# Supplementary material for: Multiple introductions of the dengue vector, Aedes aegypti, into California
Source: PLoS Negl Trop Dis. 2017 Aug 10;11(8):e0005718. doi: 10.1371/journal.pntd.0005718 (PMC5552028; doi:10.1371/journal.pntd.0005718)
Supplement: S2 File — Microsatellite data from all populations indicated in Table 1. Missing data is indicated with -9. (XLSX) [file pntd.0005718.s008.xlsx]

## Sheet: Sheet1
Sample ID	Population	Year	AC1		AC2		AC4		AC5		CT2		AG1		AG2		AG5		A1		A9		B2		B3
Fres_001	Fresno	2015	197	197	188	188	128	130	158	158	184	184	127	127	137	143	168	178	158	158	191	194	113	113	175	175
Fres_002	Fresno	2015	209	209	188	188	130	130	154	159	184	184	117	127	115	133	178	178	168	168	188	191	113	113	175	175
Fres_003	Fresno	2015	201	209	188	190	130	130	158	159	184	184	127	127	133	137	172	178	158	158	182	191	113	113	148	175
Fres_004	Fresno	2015	197	209	188	188	128	128	148	154	184	184	127	127	137	143	178	178	168	168	191	191	113	113	166	175
Fres_005	Fresno	2015	197	197	188	188	128	130	158	158	184	184	117	127	143	143	178	178	158	162	188	191	113	113	166	175
Fres_006	Fresno	2015	209	209	188	188	128	130	158	159	184	184	121	121	115	115	178	178	162	168	191	191	113	113	166	175
Fres_007	Fresno	2015	197	197	188	188	128	128	158	158	184	184	121	127	115	137	172	178	162	168	182	182	113	113	166	166
Fres_008	Fresno	2015	197	197	188	188	128	128	159	159	184	184	127	127	115	115	168	168	162	162	182	188	113	113	166	172
Fres_009	Fresno	2015	197	209	188	188	128	130	156	159	184	184	121	121	115	129	172	176	158	168	191	191	113	113	175	175
Fres_010	Fresno	2015	197	197	188	188	128	128	159	159	184	184	121	127	115	129	172	172	162	162	191	191	113	113	166	166
Fres_011	Fresno	2015	197	197	188	188	128	128	159	159	184	184	115	121	115	129	168	176	158	168	182	191	113	113	166	175
Fres_012	Fresno	2015	197	197	188	190	128	130	158	158	184	184	127	127	115	115	172	178	158	158	191	191	113	113	172	175
Fres_013	Fresno	2015	197	197	186	188	128	128	158	159	184	184	115	121	115	133	172	178	158	162	182	182	113	113	166	172
Fres_014	Fresno	2015	197	197	188	190	128	130	148	156	184	188	127	127	115	115	172	178	158	158	191	191	113	113	172	172
Fres_015	Fresno	2015	197	197	188	188	128	130	156	158	184	184	127	127	115	143	170	178	158	158	191	191	113	113	172	175
Fres_016	Fresno	2015	209	209	186	188	128	128	158	158	184	188	119	121	129	129	172	172	162	162	188	191	95	107	175	175
Fres_017	Fresno	2015	195	197	186	188	128	128	158	158	184	188	121	121	133	145	176	178	158	162	182	182	107	113	172	175
Fres_021	Fresno	2015	195	209	186	188	128	128	158	159	184	188	119	127	143	145	172	176	158	162	194	194	107	113	172	175
Fres_022	Fresno	2015	197	201	188	190	128	128	158	159	184	184	121	127	115	145	176	176	158	162	191	194	113	113	166	172
Fres_023	Fresno	2015	197	197	188	188	128	128	159	159	184	184	121	127	115	143	176	178	162	162	182	191	113	113	166	166
Fres_024	Fresno	2015	197	197	188	188	128	128	158	159	184	184	121	127	115	129	168	172	162	162	191	191	113	113	166	175
Fres_025	Fresno	2015	197	209	188	188	128	128	159	161	184	188	121	127	115	115	166	178	162	162	188	191	113	113	166	166
Fres_026A	Fresno	2015	197	197	184	188	128	130	164	164	184	184	117	117	115	129	166	172	158	158	182	188	95	95	172	175
Fres_026B	Fresno	2015	197	197	188	190	128	130	154	156	184	184	119	127	115	115	172	176	158	158	188	191	113	113	175	175
Fres_027	Fresno	2015	197	209	188	188	128	130	158	159	184	184	127	127	143	145	178	178	158	162	191	191	113	113	172	175
Fres_028	Fresno	2015	195	195	186	188	128	130	-9	-9	184	184	115	117	115	115	166	172	158	168	182	182	113	113	148	175
Fres_029	Fresno	2015	209	209	188	188	128	128	156	158	184	184	117	117	129	129	166	172	158	158	182	182	113	113	172	175
Fres_030	Fresno	2015	195	209	188	188	128	130	152	159	184	184	115	117	129	129	172	172	158	162	182	191	113	113	148	175
Fres_031	Fresno	2015	197	197	188	190	130	130	157	160	184	184	117	127	115	115	168	168	158	158	182	191	113	113	148	148
Fres_032	Fresno	2015	197	209	184	188	128	130	156	156	184	184	115	115	115	143	166	166	158	162	191	191	95	113	175	175
Fres_033	Fresno	2015	197	197	188	188	130	130	156	160	184	184	115	121	115	143	166	168	158	158	182	191	113	113	175	175
Fres_034	Fresno	2015	197	209	188	190	130	130	156	160	184	184	121	127	115	115	168	176	158	158	182	182	113	113	175	175
Fres_035	Fresno	2015	197	209	184	188	128	130	156	160	184	184	121	127	129	137	166	172	158	171	182	182	113	113	148	172
Fres_037	Fresno	2015	197	201	186	188	130	130	148	158	184	184	115	127	115	115	170	172	158	168	182	182	113	113	148	175
Ana_LC_001	Anaheim (1)	2015	197	201	186	186	128	128	157	159	184	188	117	117	115	115	168	172	168	171	182	194	113	113	148	166
Ana_LC_002	Anaheim (1)	2015	197	197	186	188	128	128	157	159	184	188	117	119	115	115	168	172	158	168	188	194	113	113	166	175
Ana_LC_003	Anaheim (1)	2015	197	197	186	186	128	130	157	159	184	188	117	117	115	115	168	172	158	168	188	194	113	113	166	175
Ana_LC_004	Anaheim (1)	2015	197	209	186	188	128	130	157	159	184	188	117	119	115	115	168	172	158	171	182	188	113	113	166	175
Ana_LC_005	Anaheim (1)	2015	197	197	186	186	128	130	157	159	184	188	117	117	115	115	168	172	158	168	188	194	113	113	166	175
Ana_LC_006	Anaheim (1)	2015	197	201	186	186	128	128	157	159	184	188	117	117	115	115	168	172	168	168	182	194	113	113	148	166
Ana_LC_007	Anaheim (1)	2015	197	201	186	186	128	128	157	157	188	188	117	119	115	115	168	172	168	171	182	194	113	113	148	166
Ana_LC_008	Anaheim (1)	2015	197	201	186	188	128	128	157	157	188	188	117	119	115	115	168	172	168	168	182	194	113	113	148	166
Ana_LC_009	Anaheim (1)	2015	197	201	186	188	128	130	157	159	184	188	117	119	115	115	168	172	158	171	182	182	113	113	166	175
Ana_LC_010	Anaheim (1)	2015	197	201	186	186	128	128	157	157	188	188	117	117	115	115	168	172	168	168	182	194	113	113	148	166
Ana_LC_011	Anaheim (1)	2015	197	201	186	188	128	128	157	157	188	188	117	119	115	115	168	172	168	171	188	194	113	113	148	166
Ana_LC_012	Anaheim (1)	2015	197	201	186	186	128	128	157	159	184	188	117	117	115	115	168	172	168	168	182	194	113	113	148	166
Ana_LC_013	Anaheim (1)	2015	197	201	186	188	128	128	159	160	184	184	117	117	115	115	168	172	168	168	182	194	113	113	148	166
Ana_LC_014	Anaheim (1)	2015	197	197	186	188	128	130	157	159	184	188	117	117	115	115	168	172	158	168	182	194	113	113	166	175
Ana_LC_015	Anaheim (1)	2015	201	209	186	188	128	128	157	159	184	188	117	117	115	115	168	172	168	171	182	182	113	113	148	166
Ana_001	Anaheim (2)	2015	195	201	186	188	-9	-9	148	148	188	188	115	119	115	115	166	168	168	171	-9	-9	104	113	166	166
Ana_002	Anaheim (2)	2015	195	201	184	188	128	128	148	159	184	188	115	119	115	115	166	168	158	171	188	188	104	113	166	166
Ana_003	Anaheim (2)	2015	197	201	188	188	128	128	161	161	184	188	119	119	115	115	166	170	159	159	182	188	104	113	166	166
Ana_004	Anaheim (2)	2015	195	197	184	188	128	128	152	159	184	188	117	119	115	145	168	172	158	171	182	188	104	113	166	175
Ana_005	Anaheim (2)	2015	197	201	188	188	128	128	152	161	184	184	119	119	115	131	166	168	158	168	182	188	104	113	166	166
Ana_006	Anaheim (2)	2015	195	195	186	188	128	128	148	159	184	188	115	119	115	115	166	168	168	171	-9	-9	104	104	166	166
Ana_007	Anaheim (2)	2015	197	201	186	188	128	128	161	161	184	184	115	119	115	115	170	170	158	168	182	188	104	113	166	166
Ana_008	Anaheim (2)	2015	195	201	184	188	128	128	148	161	184	184	115	119	115	115	166	170	168	171	182	182	104	104	166	166
Ana_009	Anaheim (2)	2015	195	201	184	186	128	128	159	161	184	188	115	115	115	115	166	166	168	171	182	188	104	113	166	166
Ana_010	Anaheim (2)	2015	201	201	184	186	128	128	159	161	184	188	115	115	115	115	166	166	171	171	182	188	104	104	166	166
Ana_011	Anaheim (2)	2015	195	195	184	186	128	128	148	152	-9	-9	115	117	115	115	166	168	168	171	182	182	104	104	166	166
Ana_012	Anaheim (2)	2015	201	201	184	188	128	128	152	161	184	184	117	119	115	115	170	170	171	171	188	188	104	104	166	166
Ana_013	Anaheim (2)	2015	197	201	184	188	128	128	161	161	184	188	117	119	115	115	168	170	158	168	182	188	95	95	166	166
Ana_014	Anaheim (2)	2015	197	197	184	188	128	128	148	148	184	184	117	119	115	115	166	166	158	158	182	188	104	113	166	166
Ana_015	Anaheim (2)	2015	195	201	184	188	128	128	148	161	188	188	117	119	115	115	168	170	168	171	182	182	95	95	166	166
Ana_016	Anaheim (2)	2015	195	201	184	188	128	128	148	152	184	188	117	119	115	145	166	168	168	168	188	188	104	113	166	166
Or_001	Orange	2015	201	201	188	188	128	128	157	161	184	188	115	119	115	115	176	176	162	162	188	194	113	113	175	175
Or_002	Orange	2015	201	203	188	188	128	128	156	158	188	188	117	119	115	115	176	178	158	158	188	188	95	113	166	166
Or_003	Orange	2015	201	201	188	188	112	128	156	161	184	188	117	119	115	120	176	176	158	158	182	188	113	113	166	166
Or_004	Orange	2015	201	201	188	188	128	128	156	161	184	188	115	115	115	115	178	178	158	162	182	188	95	113	166	175
Or_005	Orange	2015	201	203	188	188	128	128	156	161	184	188	115	115	115	115	176	178	158	158	188	194	95	95	166	166
Or_006	Orange	2015	201	201	188	188	128	128	156	161	184	188	115	117	115	115	176	178	162	171	188	188	95	95	166	175
Or_007	Orange	2015	201	201	188	188	112	128	156	158	184	188	115	117	115	115	176	178	158	158	182	188	113	113	166	166
Or_008	Orange	2015	201	201	188	188	112	128	156	158	184	188	115	117	115	120	178	178	158	162	182	188	113	113	166	175
Or_009	Orange	2015	201	201	188	188	128	128	156	156	184	184	115	117	115	115	176	178	158	171	182	194	95	95	166	166
Or_010	Orange	2015	201	201	188	188	128	128	156	158	184	188	117	117	115	120	178	178	162	171	182	194	95	113	166	175
Or_011	Orange	2015	201	201	188	188	128	128	157	161	184	188	115	117	115	120	176	178	171	171	182	188	113	113	166	166
Or_012	Orange	2015	201	203	188	188	128	128	156	158	184	188	115	117	115	115	176	178	158	158	188	194	95	95	166	166
Or_013	Orange	2015	201	201	188	188	128	128	156	161	184	188	115	117	115	115	178	178	158	158	182	188	95	113	166	166
GG_001	Garden Grove	2015	197	209	184	184	128	128	161	161	188	188	115	115	115	115	170	170	168	168	182	182	113	113	148	166
GG_002	Garden Grove	2015	209	209	184	184	128	128	161	161	184	188	115	115	115	115	170	172	168	168	182	182	107	113	166	166
GG_003	Garden Grove	2015	197	209	184	188	128	128	161	161	188	188	115	115	115	115	170	172	168	168	182	182	113	113	148	166
GG_004	Garden Grove	2015	209	209	184	184	128	128	158	161	188	188	115	115	115	115	170	170	168	168	182	182	95	95	148	166
GG_005	Garden Grove	2015	197	209	184	188	128	128	161	161	188	188	115	115	115	115	172	172	168	168	182	182	104	113	148	166
GG_006	Garden Grove	2015	197	209	184	184	128	128	161	161	188	188	115	115	115	169	170	170	168	168	182	182	104	107	166	166
GG_007	Garden Grove	2015	197	209	184	184	128	128	158	161	184	188	115	115	155	155	172	178	168	168	182	182	104	104	148	166
GG_008	Garden Grove	2015	197	209	184	184	128	128	156	161	188	188	115	115	115	115	170	172	168	168	182	182	107	113	166	166
GG_009	Garden Grove	2015	197	209	184	188	128	128	156	158	188	188	115	115	115	115	170	170	168	168	182	182	113	113	148	166
GG_010	Garden Grove	2015	209	209	188	188	128	128	161	161	188	188	115	119	115	115	170	170	168	168	182	182	95	113	166	166
GG_011	Garden Grove	2015	209	209	184	184	128	128	156	158	188	188	115	115	115	115	170	178	168	168	182	182	95	107	166	166
GG_012	Garden Grove	2015	209	209	188	188	128	128	161	161	188	188	115	119	155	155	170	172	168	168	182	182	104	104	148	166
GG_013	Garden Grove	2015	209	209	184	188	128	128	161	161	184	188	115	119	115	115	170	172	168	168	182	182	113	113	166	166
GG_014	Garden Grove	2015	197	197	184	188	128	128	158	158	188	188	115	119	115	115	172	172	168	168	182	182	113	113	148	166
GG_015	Garden Grove	2015	209	209	184	188	128	128	161	161	188	188	115	119	115	115	170	172	168	168	182	182	113	113	166	166
GG_016	Garden Grove	2015	209	209	188	188	128	128	156	161	184	188	115	119	115	115	172	172	168	168	182	182	95	104	148	166
GG_017	Garden Grove	2015	209	209	184	188	128	128	158	158	188	188	115	119	115	115	170	172	168	168	182	182	107	107	148	166
GG_018	Garden Grove	2015	197	209	184	188	128	128	161	161	184	184	115	119	115	155	172	172	168	168	182	182	104	113	166	166
GG_019	Garden Grove	2015	209	209	184	188	128	128	161	161	184	188	115	119	115	115	170	172	168	168	182	182	107	113	166	166
GG_020	Garden Grove	2015	209	209	188	188	128	128	161	161	188	188	115	119	115	155	170	172	168	168	182	182	104	107	148	166
GG_021	Garden Grove	2015	197	209	184	188	128	128	158	161	184	188	115	119	115	115	170	172	168	168	182	182	95	113	148	166
GG_022	Garden Grove	2015	197	209	184	188	128	128	161	161	188	188	115	119	115	115	170	172	168	168	182	182	107	113	148	166
GG_023	Garden Grove	2015	197	209	188	188	128	128	161	161	188	188	115	119	115	115	170	172	168	168	182	182	107	113	148	166
GG_024	Garden Grove	2015	209	209	184	188	128	128	156	158	188	188	115	119	115	115	170	172	168	168	182	182	113	113	148	166
GG_025	Garden Grove	2015	209	209	184	188	128	128	158	158	188	188	115	119	115	115	170	170	168	168	182	182	95	104	148	166
GG_026	Garden Grove	2015	209	209	184	188	128	128	156	161	188	188	115	119	115	115	170	172	168	168	-9	-9	107	107	166	166
GG_027	Garden Grove	2015	197	209	184	188	128	128	161	161	188	188	115	119	115	115	170	172	168	168	182	182	113	113	148	166
GG_028	Garden Grove	2015	197	209	184	188	128	128	161	161	184	188	115	119	115	115	172	172	168	168	182	182	107	113	166	166
GG_029	Garden Grove	2015	197	209	184	188	128	128	158	158	188	188	115	119	115	115	170	172	168	168	182	182	95	113	148	148
SA_001	Santa Ana	2015	197	209	188	188	128	128	158	158	188	188	115	119	137	151	168	172	168	168	182	182	104	113	166	175
SA_002	Santa Ana	2015	201	209	188	188	128	128	157	158	188	188	119	119	137	151	168	168	168	168	182	182	104	104	148	175
SA_003	Santa Ana	2015	197	201	188	188	128	128	158	158	188	188	117	119	151	151	168	168	168	168	188	188	104	104	166	175
SA_004	Santa Ana	2015	201	201	188	188	128	128	157	158	188	188	115	119	137	151	168	176	168	168	182	182	104	104	166	175
SA_005	Santa Ana	2015	201	209	188	188	128	128	158	158	188	188	119	119	137	137	172	176	168	168	182	188	104	104	175	175
SA_006	Santa Ana	2015	209	209	188	188	128	128	158	158	188	188	119	119	131	137	172	176	168	168	-9	-9	104	104	148	175
SA_007	Santa Ana	2015	209	209	188	188	128	128	158	158	188	188	119	119	137	151	168	172	168	168	-9	-9	104	104	148	148
SA_008	Santa Ana	2015	201	209	188	188	128	128	157	158	188	188	119	119	137	151	168	168	168	168	182	182	104	104	175	175
SA_009	Santa Ana	2015	201	209	188	188	128	128	157	158	188	188	117	119	137	151	168	168	168	168	-9	-9	104	104	148	175
SA_010	Santa Ana	2015	197	209	188	188	128	128	158	158	188	188	115	119	137	151	168	168	168	168	-9	-9	104	104	166	175
SA_011	Santa Ana	2015	201	209	188	188	128	128	157	158	-9	-9	115	117	137	151	172	176	168	168	182	182	104	104	148	148
SA_012	Santa Ana	2015	201	201	188	188	128	128	157	158	188	188	115	119	137	151	168	168	168	168	182	188	104	104	175	175
SA_013	Santa Ana	2015	197	201	188	188	128	128	157	158	188	188	117	119	137	137	168	172	168	168	182	182	104	104	175	175
SA_014	Santa Ana	2015	197	209	188	188	128	128	158	158	188	188	119	119	137	151	168	172	168	168	182	188	104	113	148	175
SA_015	Santa Ana	2015	201	209	188	188	128	128	157	157	188	188	117	119	137	151	168	172	168	168	182	182	104	104	148	148
SA_016	Santa Ana	2015	201	201	188	188	128	128	158	158	188	188	117	119	131	151	168	168	168	168	182	182	104	113	148	175
SA_017	Santa Ana	2015	197	209	188	188	128	128	157	158	188	188	117	117	137	151	168	168	168	168	182	182	104	104	148	175
SA_018	Santa Ana	2015	197	201	188	188	128	128	158	158	188	188	115	117	137	137	168	168	168	168	182	188	104	104	166	175
SA_019	Santa Ana	2015	201	201	188	188	128	128	157	158	188	188	119	119	131	151	168	168	168	168	182	182	104	113	148	175
SA_020	Santa Ana	2015	209	209	188	188	128	128	157	157	188	188	117	119	137	151	168	172	168	168	-9	-9	104	104	148	175
SA_021	Santa Ana	2015	201	209	188	188	128	128	157	158	188	188	115	119	137	151	168	168	168	168	-9	-9	104	104	148	175
SA_022	Santa Ana	2015	201	205	188	188	128	128	157	158	188	188	117	119	131	151	168	172	168	168	-9	-9	104	104	166	175
SA_023	Santa Ana	2015	201	209	188	188	128	128	158	158	188	188	117	119	137	151	188	188	168	168	188	188	104	104	148	166
SA_025	Santa Ana	2015	197	209	188	188	128	128	158	158	188	188	115	119	137	151	172	172	168	168	182	182	104	104	166	175
SA_026	Santa Ana	2015	201	209	188	188	128	128	157	158	188	188	117	119	131	137	168	176	168	168	182	182	104	113	148	175
SA_027	Santa Ana	2015	209	209	188	188	128	128	158	158	188	188	119	119	137	137	168	168	167	167	182	182	104	104	175	175
SA_028	Santa Ana	2015	201	201	188	188	128	128	157	158	188	188	115	119	151	151	168	176	168	168	182	188	104	104	175	175
SA_029	Santa Ana	2015	201	201	188	188	128	128	158	158	188	188	115	117	131	151	168	176	168	168	182	182	104	104	175	175
SA_030	Santa Ana	2015	209	209	188	188	128	128	157	158	188	188	119	119	137	151	168	168	149	170	188	188	104	104	148	175
SA_031	Santa Ana	2015	197	209	188	188	128	128	158	158	188	188	117	117	131	137	168	168	168	168	188	188	104	104	166	175
MV_001	Mission Viejo	2015	197	209	188	188	128	128	158	159	184	188	117	117	115	115	166	180	158	158	191	191	113	113	166	166
MV_002	Mission Viejo	2015	209	209	186	188	128	128	158	159	184	184	117	119	115	115	166	176	158	158	191	191	113	113	166	166
MV_003	Mission Viejo	2015	197	197	188	188	128	128	156	158	184	184	117	117	115	115	166	168	158	171	191	191	113	113	166	166
MV_004	Mission Viejo	2015	197	197	188	188	128	128	158	158	184	188	117	121	115	115	166	168	158	158	191	191	113	113	166	166
MV_005	Mission Viejo	2015	197	209	188	188	128	128	158	159	184	188	115	117	115	115	166	166	158	162	191	194	113	113	166	166
MV_006	Mission Viejo	2015	197	197	188	188	128	128	149	149	184	184	119	119	115	115	166	178	158	171	191	191	113	113	166	166
MV_007	Mission Viejo	2015	197	209	188	188	128	128	149	156	184	184	117	119	115	115	166	166	158	158	191	191	113	113	166	166
MV_008	Mission Viejo	2015	197	209	188	188	128	128	149	156	184	184	117	117	115	115	166	168	158	171	191	191	113	113	166	166
MV_009	Mission Viejo	2015	209	209	188	188	128	128	149	160	184	184	117	119	115	115	166	166	158	158	191	191	113	113	166	166
MV_010	Mission Viejo	2015	197	209	188	188	128	128	149	156	184	184	117	117	115	115	166	168	158	158	191	191	113	113	166	166
MV_012	Mission Viejo	2015	197	197	188	188	128	128	149	159	184	188	115	117	115	115	168	168	158	158	191	191	113	113	166	166
MV_013	Mission Viejo	2015	197	209	188	188	128	128	156	160	184	184	117	119	115	115	166	168	158	158	191	191	113	113	166	166
MV_014	Mission Viejo	2015	197	209	188	188	128	128	158	158	184	184	117	117	115	115	166	168	158	162	194	194	113	113	166	172
MV_015	Mission Viejo	2015	209	209	188	188	128	130	158	160	184	184	115	117	115	115	166	168	168	171	194	194	113	113	166	175
MV_016	Mission Viejo	2015	197	209	188	188	128	128	149	158	184	184	119	119	115	115	168	168	158	158	191	191	113	113	166	166
MV_017	Mission Viejo	2015	197	209	188	188	128	128	158	160	184	188	115	117	115	115	166	178	162	171	191	191	113	113	166	166
MV_018	Mission Viejo	2015	197	209	188	188	128	128	149	158	184	184	117	119	115	115	168	168	158	162	194	194	113	113	166	166
MV_019	Mission Viejo	2015	197	197	188	188	128	128	158	158	184	184	119	119	115	115	166	168	158	158	194	194	113	113	166	166
MV_020	Mission Viejo	2015	197	197	188	188	128	128	158	158	184	184	119	121	115	115	166	166	158	158	191	191	113	113	166	166
MV_021	Mission Viejo	2015	197	209	186	188	128	128	156	160	184	184	117	119	115	115	166	168	158	158	191	194	113	113	166	166
MV_022	Mission Viejo	2015	197	197	188	188	128	128	158	159	184	188	115	117	115	115	166	166	158	158	191	194	113	113	166	172
MV_023	Mission Viejo	2015	197	209	188	188	128	128	158	158	184	184	117	119	115	115	166	168	158	171	191	194	113	113	166	166
MV_024	Mission Viejo	2015	197	197	188	188	128	128	156	158	184	184	115	119	115	115	168	168	158	171	191	194	113	113	166	166
MV_025	Mission Viejo	2015	197	197	188	188	128	128	158	158	188	188	121	121	115	115	166	168	158	158	191	194	113	113	166	166
MV_026	Mission Viejo	2015	197	209	188	188	128	128	149	158	-9	-9	117	119	115	115	166	168	158	158	182	182	113	113	166	172
MV_027	Mission Viejo	2015	197	209	188	188	128	128	149	158	184	184	117	117	115	115	166	166	158	158	191	194	113	113	166	166
MV_028	Mission Viejo	2015	197	209	188	188	128	128	149	158	184	184	115	121	115	115	168	178	158	162	191	191	113	113	166	166
MV_029	Mission Viejo	2015	197	197	188	188	128	128	158	158	184	188	115	119	115	115	166	166	158	158	-9	-9	113	113	166	166
MV_030	Mission Viejo	2015	197	209	188	188	128	128	156	158	184	184	119	119	115	115	166	166	158	158	191	191	113	113	166	166
MV_031	Mission Viejo	2015	197	209	188	188	128	128	149	158	184	184	117	119	115	115	166	168	158	171	194	194	113	113	166	166
MV_032	Mission Viejo	2015	197	209	186	188	128	128	149	156	184	184	119	121	115	115	166	168	171	171	191	191	113	113	166	166
MV_033	Mission Viejo	2015	197	197	188	188	128	128	149	158	184	184	115	117	115	115	166	168	158	158	182	191	113	113	166	172
MV_034	Mission Viejo	2015	197	209	188	188	128	128	149	149	184	184	119	119	115	115	168	168	158	158	191	191	113	113	166	166
MV_035	Mission Viejo	2015	197	209	186	188	128	128	149	156	184	184	117	119	115	115	168	178	158	162	191	194	-9	-9	-9	-9
MV_036	Mission Viejo	2015	197	209	188	188	128	128	158	159	184	188	117	117	115	115	166	168	158	158	191	194	113	113	166	166
MV_037	Mission Viejo	2015	197	209	188	188	128	128	158	160	184	184	117	117	115	115	166	166	158	168	191	194	113	113	166	175
MV_038	Mission Viejo	2015	197	209	188	188	130	130	158	159	184	188	117	117	115	115	166	168	158	158	191	191	113	113	175	175
MV_039	Mission Viejo	2015	197	197	186	188	128	128	156	160	184	184	115	119	115	115	168	180	158	171	182	191	113	113	166	172
MV_040	Mission Viejo	2015	197	209	186	188	128	128	158	160	184	184	117	119	115	115	166	176	158	171	191	191	113	113	166	166
MV_041	Mission Viejo	2015	209	209	188	188	128	128	149	158	184	184	117	117	115	115	166	168	158	158	194	194	107	113	166	175
MV_042	Mission Viejo	2015	209	209	186	188	128	128	156	158	184	184	117	119	115	115	166	166	158	158	191	194	113	113	166	166
MV_043	Mission Viejo	2015	209	209	188	188	128	128	156	160	184	184	117	119	115	115	166	168	158	171	191	191	113	113	166	166
MV_044	Mission Viejo	2015	209	209	188	188	128	128	149	159	184	188	117	119	115	115	166	168	158	158	191	194	113	113	166	166
MV_045	Mission Viejo	2015	197	197	188	188	128	128	149	158	184	184	117	119	115	115	166	168	158	171	191	191	113	113	166	166
MV_046	Mission Viejo	2015	197	209	188	188	128	128	149	156	184	184	117	119	115	115	166	166	158	158	191	191	113	113	166	166
MV_047	Mission Viejo	2015	197	197	186	188	128	128	156	159	184	184	119	119	115	115	166	168	158	162	191	191	113	113	166	166
MV_048	Mission Viejo	2015	197	209	186	188	128	128	158	158	184	184	117	119	115	115	166	166	158	171	191	191	113	113	166	166
MV_049	Mission Viejo	2015	197	209	188	188	128	128	156	158	184	184	117	119	115	115	166	168	158	171	194	194	113	113	166	166
MV_050	Mission Viejo	2015	197	197	188	188	128	128	159	160	184	188	115	117	115	115	166	166	158	158	191	194	113	113	166	166
MV_051	Mission Viejo	2015	197	209	188	188	128	128	149	160	184	184	117	117	115	115	166	168	158	162	191	194	113	113	166	166
MV_052	Mission Viejo	2015	197	209	188	188	128	128	158	159	184	188	117	117	115	115	168	176	158	158	191	191	113	113	166	175
Cw_001	San Diego (1)	2015	197	201	184	188	128	128	157	158	188	188	117	119	115	117	168	178	168	171	182	182	113	113	166	175
Cw_002	San Diego (1)	2015	197	197	188	188	128	128	157	157	184	184	117	117	115	115	178	178	158	168	188	191	113	113	166	175
Cw_003	San Diego (1)	2015	197	209	186	188	128	128	156	158	184	188	117	117	115	115	168	168	158	171	194	194	113	113	166	166
Cw_004	San Diego (1)	2015	197	209	184	188	128	128	156	156	184	188	115	119	115	115	172	178	158	168	182	182	113	113	166	166
Cw_005	San Diego (1)	2015	197	201	184	186	128	128	157	158	188	188	117	119	115	117	168	178	168	171	182	182	113	113	166	175
Cw_006	San Diego (1)	2015	197	197	184	188	128	128	157	158	184	184	115	117	115	115	178	178	158	168	188	191	113	113	166	175
Cw_007	San Diego (1)	2015	197	201	184	184	128	128	157	157	184	188	115	119	115	141	168	172	168	171	182	188	113	113	166	175
Cw_008	San Diego (1)	2015	197	201	184	186	128	128	157	157	184	184	115	117	117	141	168	178	168	171	182	182	113	113	166	175
Cw_009	San Diego (1)	2015	201	201	184	188	128	128	157	158	184	184	115	117	115	115	178	178	158	158	182	188	113	113	166	166
Cw_010	San Diego (1)	2015	197	197	186	188	128	128	156	158	184	184	115	117	115	115	168	172	158	158	182	182	113	113	166	175
Cw_011	San Diego (1)	2015	197	201	184	184	128	128	157	158	184	188	115	119	115	141	168	168	168	171	182	188	113	113	166	175
Cw_012	San Diego (1)	2015	197	201	188	188	128	128	156	158	184	184	115	117	115	115	172	176	171	171	188	188	113	113	166	175
Cw_013	San Diego (1)	2015	197	197	184	186	128	128	156	158	184	184	115	117	115	115	172	178	158	171	182	188	-9	113	166	175
Cw_014	San Diego (1)	2015	197	201	184	188	128	128	156	156	184	184	115	117	115	115	178	178	158	168	182	182	113	113	175	175
Cw_015	San Diego (1)	2015	197	197	184	188	128	128	157	158	184	184	117	117	115	115	178	178	158	168	188	191	113	113	166	175
Cw_016	San Diego (1)	2015	197	201	184	188	128	128	157	158	184	188	115	117	115	141	168	172	158	158	182	182	113	113	166	166
Cw_017	San Diego (1)	2015	201	209	186	188	128	128	156	158	184	188	117	117	115	131	168	172	158	171	182	182	95	113	166	166
Cw_018	San Diego (1)	2015	197	201	184	186	128	128	156	158	184	188	115	117	115	117	168	178	168	171	182	182	113	113	166	175
Cw_019	San Diego (1)	2015	197	201	188	188	128	128	156	156	184	188	117	117	115	115	168	172	158	171	182	182	113	113	166	166
Cw_020	San Diego (1)	2015	197	201	184	184	128	128	156	158	184	188	115	119	131	141	168	172	158	168	182	188	113	113	166	175
Cw_021	San Diego (1)	2015	201	201	184	188	128	128	156	158	184	188	115	117	115	117	172	178	168	171	182	182	113	113	166	175
Cw_022	San Diego (1)	2015	201	201	184	188	128	128	158	158	184	184	115	117	115	115	168	178	158	158	188	188	113	113	166	166
Cw_023	San Diego (1)	2015	201	201	184	188	128	128	158	158	184	184	117	119	115	115	178	178	158	171	182	182	113	113	166	175
Cw_024	San Diego (1)	2015	197	201	184	188	128	128	158	158	188	188	115	117	115	151	166	178	158	168	182	182	113	113	175	175
Cw_025	San Diego (1)	2015	197	197	184	184	128	128	156	156	184	188	117	117	115	117	166	166	171	171	182	182	113	113	166	166
Cw_026	San Diego (1)	2015	197	201	184	186	128	128	156	158	188	188	117	119	115	117	172	178	168	171	182	182	113	113	166	175
Cw_027	San Diego (1)	2015	197	197	184	188	130	130	156	158	184	188	117	119	115	115	168	178	158	158	182	182	113	113	166	166
Cw_028	San Diego (1)	2015	197	201	184	184	128	128	156	156	184	188	115	119	131	141	168	168	158	158	182	182	113	113	166	166
SY_001	San Diego (2)	2015	197	201	184	188	128	128	156	156	184	184	115	117	115	115	168	168	168	171	188	188	113	113	166	175
SY_002	San Diego (2)	2015	197	201	188	188	128	128	156	158	184	188	117	119	115	141	166	166	158	158	182	182	107	113	166	175
SY_003	San Diego (2)	2015	197	209	186	188	128	128	156	156	188	188	117	117	115	151	172	176	171	171	182	188	113	113	166	175
SY_004	San Diego (2)	2015	197	197	184	188	128	128	156	156	184	184	115	119	115	131	176	178	168	168	182	182	95	113	166	175
SY_005	San Diego (2)	2015	197	201	186	188	128	128	156	156	184	188	117	117	115	115	168	172	171	171	182	182	113	113	166	175
SY_006	San Diego (2)	2015	201	201	188	188	128	128	156	156	184	184	117	117	115	117	172	178	158	171	182	182	113	113	166	166
SY_007	San Diego (2)	2015	197	197	186	188	130	130	156	158	184	184	117	117	115	137	166	176	158	171	182	182	113	113	166	166
SY_008	San Diego (2)	2015	201	209	184	188	128	128	156	158	184	184	115	117	115	137	176	178	158	171	191	191	104	113	166	175
SY_009	San Diego (2)	2015	197	209	186	188	128	128	158	158	184	188	117	117	115	115	166	168	171	171	182	188	113	113	166	166
SY_010	San Diego (2)	2015	197	201	188	188	128	128	156	156	184	184	117	119	115	131	172	178	168	168	182	182	113	113	166	175
SY_011	San Diego (2)	2015	197	197	184	188	128	128	156	156	184	188	115	115	115	131	172	178	168	171	182	182	95	113	175	175
SY_012	San Diego (2)	2015	197	197	184	186	128	128	156	158	184	184	117	119	115	117	172	172	168	171	182	188	113	113	166	175
SY_013	San Diego (2)	2015	197	201	188	188	130	130	156	158	184	184	115	117	115	131	172	178	168	171	182	188	95	113	166	175
SY_014	San Diego (2)	2015	197	197	188	188	128	128	156	158	184	184	117	119	115	141	176	178	158	158	182	188	107	113	175	175
SY_015	San Diego (2)	2015	197	197	188	188	128	128	156	156	184	188	117	117	115	131	166	166	171	171	182	182	95	95	166	166
SY_016	San Diego (2)	2015	197	201	188	188	128	128	156	156	188	188	117	117	117	117	168	172	158	171	182	182	113	113	166	166
SY_017	San Diego (2)	2015	197	201	184	184	128	128	156	158	184	184	115	117	117	117	166	178	171	171	182	191	113	113	166	166
SY_018	San Diego (2)	2015	197	201	184	188	128	128	158	160	184	188	115	117	117	141	168	172	168	171	182	188	113	113	175	175
SY_019	San Diego (2)	2015	197	201	188	188	128	128	156	158	184	188	115	117	115	149	172	178	158	158	-9	-9	104	107	166	166
SY_020	San Diego (2)	2015	197	201	188	188	128	128	156	156	184	184	117	117	115	131	166	166	158	171	182	188	95	113	166	175
SY_021	San Diego (2)	2015	197	201	184	188	128	128	156	158	184	188	115	117	117	121	166	172	158	168	182	188	113	113	166	166
SY_022	San Diego (2)	2015	197	201	184	186	128	128	156	156	184	184	115	117	115	141	166	168	158	171	188	188	113	113	166	175
SY_023	San Diego (2)	2015	197	197	188	188	128	128	156	158	184	188	115	117	115	115	172	172	158	168	182	182	113	113	166	175
SY_024	San Diego (2)	2015	197	201	184	188	128	128	156	158	184	188	115	117	115	117	168	178	158	171	182	188	113	113	166	175
SY_025	San Diego (2)	2015	197	201	184	188	128	128	156	158	184	184	115	115	115	115	168	168	158	171	182	182	113	113	166	166
SY_026	San Diego (2)	2015	197	197	188	188	128	128	158	160	184	188	117	117	115	115	166	168	168	171	188	191	113	113	166	175
SY_027	San Diego (2)	2015	201	209	184	188	128	128	156	158	184	188	117	119	115	131	172	178	168	171	188	188	113	113	166	175
SY_028	San Diego (2)	2015	197	201	184	188	130	130	156	158	184	188	115	117	115	115	172	176	158	158	182	188	95	113	166	166
SY_029	San Diego (2)	2015	201	209	184	188	128	128	156	158	184	188	117	119	115	115	178	178	168	171	182	188	113	113	166	166
SY_030	San Diego (2)	2015	197	201	186	188	128	128	156	156	184	184	115	117	115	117	168	168	158	171	182	182	113	113	166	166
Exe_001	Exeter	2014	201	203	184	188	128	130	147	147	186	186	117	121	115	119	166	172	156	168	188	188	113	113	166	166
Exe_002	Exeter	2014	201	203	188	190	128	130	147	148	184	184	117	117	115	119	168	176	168	168	182	182	113	113	148	166
Exe_003	Exeter	2014	201	203	188	190	128	128	147	147	186	186	117	117	115	119	166	172	159	168	182	191	113	113	166	166
Exe_004	Exeter	2014	201	203	184	188	128	130	147	148	184	186	117	121	119	119	172	176	168	168	182	188	113	113	148	166
Exe_005	Exeter	2014	201	203	184	188	128	128	147	148	184	184	117	121	119	119	168	168	156	156	182	188	113	113	166	166
Exe_006	Exeter	2014	202	203	188	190	128	130	147	147	184	184	117	117	115	115	166	176	168	168	182	191	113	113	166	166
Exe_007	Exeter	2014	201	201	184	184	128	128	147	147	186	186	121	121	115	119	172	172	168	168	188	188	113	113	166	166
Exe_008	Exeter	2014	201	203	184	188	128	130	147	147	184	184	117	121	119	119	172	176	168	168	182	182	113	113	148	166
Exe_009	Exeter	2014	201	203	184	188	128	130	147	147	186	186	117	121	119	119	168	176	159	159	182	188	113	113	148	166
Exe_010	Exeter	2014	201	203	188	190	128	128	147	148	184	186	117	117	115	119	172	176	159	159	188	191	113	113	166	166
Exe_011	Exeter	2014	203	203	188	190	128	130	147	148	184	184	117	117	115	115	166	176	168	168	182	191	113	113	166	166
Exe_013	Exeter	2014	201	203	188	190	128	128	147	147	184	186	117	117	115	119	166	176	156	168	182	191	113	113	166	166
Exe_014	Exeter	2014	201	203	184	190	128	130	148	148	184	184	117	121	119	119	166	172	156	156	188	191	113	113	166	166
Exe_015	Exeter	2014	202	203	188	190	128	128	147	148	184	186	117	117	115	119	172	172	159	168	182	182	113	113	166	166
Exe_016	Exeter	2014	201	201	184	188	128	130	147	147	184	184	117	121	119	119	168	176	168	168	182	188	113	113	148	166
Exe_017	Exeter	2014	201	203	184	184	130	130	147	147	184	186	117	121	119	119	166	176	156	168	188	191	113	113	148	166
Exe_018	Exeter	2014	201	203	188	190	128	128	148	148	184	184	117	117	115	115	166	176	168	168	191	191	113	113	166	166
Exe_019	Exeter	2014	201	203	184	188	130	130	147	147	184	186	117	121	115	119	166	168	156	156	191	191	113	113	148	166
Exe_020	Exeter	2014	201	203	184	190	128	128	147	148	184	186	117	121	115	119	168	172	156	168	182	188	113	113	166	166
Exe_021	Exeter	2014	201	203	188	190	128	128	147	148	184	184	117	117	119	119	172	172	156	168	182	188	113	113	166	166
Exe_022	Exeter	2014	203	203	184	188	128	130	147	147	186	186	117	121	115	115	166	172	159	159	182	191	113	113	148	166
Exe_023	Exeter	2014	202	203	184	190	128	130	147	148	184	184	117	117	119	119	168	176	156	168	182	191	113	113	166	166
Exe_024	Exeter	2014	201	203	184	188	128	130	147	147	186	186	117	121	115	115	166	172	159	168	188	191	113	113	148	166
SM_003	San Mateo	2013	197	209	188	188	128	128	148	156	184	184	117	127	133	143	178	178	158	158	182	194	113	113	166	175
SM_004	San Mateo	2013	197	197	188	188	128	130	148	159	184	188	121	127	115	143	168	178	168	171	182	191	113	113	166	175
SM_005	San Mateo	2013	197	197	188	188	130	130	159	159	184	184	117	127	115	133	168	178	158	168	182	191	113	113	175	175
SM_006	San Mateo	2013	197	197	188	188	130	130	148	158	184	188	117	127	133	145	178	178	158	158	182	191	113	113	175	175
SM_007	San Mateo	2013	197	197	188	188	130	130	156	159	184	184	121	127	137	143	168	178	158	162	191	194	113	113	175	175
SM_008	San Mateo	2013	197	209	188	190	128	128	148	156	184	184	127	127	137	143	178	178	158	158	191	194	113	113	172	175
SM_009	San Mateo	2013	197	197	188	188	130	130	158	159	184	184	121	121	149	149	176	176	158	158	182	191	107	113	175	175
SM_010	San Mateo	2013	197	197	184	188	128	130	158	159	184	184	121	127	115	133	178	178	168	171	182	182	113	113	166	175
SM_011	San Mateo	2013	197	201	184	190	130	130	156	158	184	184	117	127	115	115	168	178	158	168	194	194	113	113	148	175
SM_012	San Mateo	2013	209	209	188	188	128	128	148	156	184	184	115	121	143	143	178	178	158	158	188	194	113	113	166	172
SM_013	San Mateo	2013	197	197	188	188	128	128	159	159	184	184	121	127	143	145	178	178	168	168	182	191	113	113	175	175
SM_014	San Mateo	2013	197	197	188	188	130	130	158	159	184	184	121	121	149	149	176	178	158	158	182	191	113	113	175	175
SM_015	San Mateo	2013	197	209	188	188	128	130	157	158	184	188	117	117	115	115	172	176	158	162	182	182	107	113	166	175
SM_016	San Mateo	2013	197	197	188	188	-9	-9	157	157	184	184	115	117	143	149	176	176	158	162	-9	-9	107	113	175	175
SM_017	San Mateo	2013	197	197	188	188	130	130	159	159	184	184	121	127	115	133	168	178	158	168	182	191	113	113	175	175
SM_018	San Mateo	2013	197	197	188	188	128	130	157	158	184	184	117	127	137	143	166	178	162	168	182	188	113	113	148	175
SM2_023	San Mateo	2013	197	209	188	190	128	128	148	156	184	184	127	127	137	143	178	178	158	162	188	194	113	113	175	175
SM2_024	San Mateo	2013	197	197	188	188	128	130	157	159	184	184	117	127	145	149	176	178	158	168	191	191	113	113	175	175
SM2_025	San Mateo	2013	197	209	188	188	128	130	148	158	184	188	121	127	143	145	172	178	162	168	182	194	113	113	148	166
SM2_026	San Mateo	2013	201	209	188	188	128	128	148	160	184	188	121	127	141	143	168	178	158	162	182	182	113	113	166	175
SM2_027	San Mateo	2013	197	197	188	188	130	130	158	159	184	184	121	121	143	149	176	176	158	158	182	191	107	113	175	175
SM2_031	San Mateo	2013	197	197	188	190	128	130	158	160	184	184	121	127	115	115	172	178	158	162	182	182	113	113	166	175
CMad_001	Madera (1)	2013	197	201	188	188	128	128	148	154	184	188	115	121	115	145	166	178	158	158	182	182	113	113	166	175
CMad_002	Madera (1)	2013	197	209	184	188	128	128	154	158	184	184	121	127	133	143	168	172	158	158	182	182	113	113	175	175
CMad_003	Madera (1)	2013	197	201	184	188	128	130	158	159	184	184	115	127	115	133	178	178	162	168	182	188	113	113	148	175
CMad_006	Madera (1)	2013	197	209	184	188	128	128	159	159	184	184	121	127	143	143	168	178	162	162	182	182	113	113	166	166
CMad_007	Madera (1)	2013	197	197	188	188	128	130	159	159	184	184	121	127	143	143	168	176	158	158	182	191	113	113	175	175
CMad_010	Madera (1)	2013	199	209	184	188	128	130	148	159	184	184	117	121	137	143	172	178	162	162	182	191	113	113	175	175
CMad_011	Madera (1)	2013	201	209	184	188	128	128	156	160	184	188	115	127	143	145	176	178	162	162	182	194	95	113	175	175
CMad_015	Madera (1)	2013	197	197	188	188	128	130	158	160	184	188	117	121	115	115	168	176	168	168	182	194	113	113	175	175
CMad_016	Madera (1)	2013	197	209	188	188	128	130	156	160	184	184	117	117	115	115	176	176	162	168	191	194	113	113	148	166
CMad_017	Madera (1)	2013	197	197	188	188	128	130	148	159	188	188	121	127	115	143	178	178	162	162	182	182	113	113	172	175
CMad_020	Madera (1)	2013	197	197	188	188	130	130	158	160	184	188	121	127	115	145	178	178	162	168	182	182	113	113	148	175
CMad_021	Madera (1)	2013	197	197	188	188	130	130	156	160	184	184	117	121	115	143	178	178	158	168	182	182	113	113	148	148
CMad_025	Madera (1)	2013	209	209	184	190	128	128	156	159	184	188	117	127	115	137	176	176	162	162	182	194	113	113	166	166
CMad_026	Madera (1)	2013	197	209	188	188	128	130	158	159	184	184	117	121	143	143	178	178	158	162	182	194	113	113	166	172
CMad_027	Madera (1)	2013	197	209	184	188	128	128	158	159	184	184	115	121	115	143	178	178	158	162	182	182	107	113	166	175
CMad_030	Madera (1)	2013	209	209	184	188	128	128	148	148	184	188	127	127	143	143	168	176	168	168	191	194	113	113	175	175
CMad_031	Madera (1)	2013	197	197	188	188	130	130	159	160	184	184	117	127	133	143	178	178	158	158	182	191	113	113	148	175
CMad_032	Madera (1)	2013	197	197	188	188	128	130	158	159	184	184	121	121	115	115	166	172	158	162	182	194	113	113	166	175
CMad_035	Madera (1)	2013	197	209	188	188	128	130	158	160	184	184	127	127	143	143	176	178	158	162	191	191	113	113	175	175
CMad_036	Madera (1)	2013	197	209	188	188	128	130	158	159	184	184	115	117	143	143	172	176	168	168	182	191	113	113	148	166
CMad_038	Madera (1)	2013	197	197	188	188	130	130	159	159	184	184	121	127	115	133	176	178	158	168	182	194	113	113	148	148
CMad_039	Madera (1)	2013	197	197	184	188	130	130	158	160	184	184	121	127	115	143	168	178	158	162	182	191	113	113	175	175
CMad_040	Madera (1)	2013	197	209	188	188	128	128	148	148	188	188	117	127	133	137	172	178	158	162	182	194	113	113	166	172
CMad_043	Madera (1)	2013	197	209	184	188	128	130	156	158	184	188	115	121	115	145	172	178	158	162	182	182	113	113	172	175
CMad_044	Madera (1)	2013	197	199	188	190	130	130	148	159	184	188	127	127	133	145	168	178	158	162	182	188	113	113	148	175
CMad_045	Madera (1)	2013	197	209	184	188	128	130	148	159	184	188	117	121	133	143	168	178	162	162	191	194	113	113	166	175
CMad_046	Madera (1)	2013	209	209	188	188	128	128	158	158	184	184	121	121	115	115	178	178	162	168	182	191	113	113	166	175
CMad_050	Madera (1)	2013	197	209	188	188	128	130	157	159	184	184	117	121	115	145	172	176	162	168	182	191	113	113	148	175
CMad_051	Madera (1)	2013	197	209	188	188	128	128	158	161	184	184	121	127	115	143	172	178	158	162	191	191	113	113	166	172
CMad_052	Madera (1)	2013	197	209	188	190	128	128	158	159	184	184	117	127	115	145	168	176	162	168	182	182	113	113	166	175
CMad_053	Madera (1)	2013	197	197	188	190	128	130	148	156	184	188	121	127	115	143	178	178	158	158	188	191	113	113	148	166
CMad_054	Madera (1)	2013	197	201	188	188	128	128	156	160	184	188	121	127	137	143	178	178	162	162	182	191	113	113	166	172
CMad_055	Madera (1)	2013	197	209	184	188	128	130	158	159	184	184	127	127	137	145	176	178	158	162	182	182	113	113	148	166
CMad_058	Madera (1)	2013	197	201	188	188	128	128	159	159	184	184	121	121	143	143	168	178	158	162	182	182	113	113	166	172
CMad_061	Madera (1)	2013	197	197	188	188	128	130	158	159	184	184	117	121	115	137	168	178	162	162	182	182	113	113	175	175
CMad_062	Madera (1)	2013	197	209	188	188	130	130	159	159	184	184	115	121	143	143	172	176	158	162	182	182	95	113	175	175
CMad_063	Madera (1)	2013	197	209	188	188	128	128	156	158	184	188	117	121	115	143	176	178	158	158	182	188	113	113	172	175
CMad_064	Madera (1)	2013	197	209	188	188	130	130	148	158	188	188	117	127	143	143	178	178	158	168	191	191	113	113	148	175
CMad_065	Madera (1)	2013	197	209	188	188	128	130	148	156	184	184	121	121	115	115	176	178	158	158	182	182	113	113	148	166
CMad_067	Madera (1)	2013	209	209	188	188	128	128	148	158	184	188	121	127	115	143	176	178	162	168	182	188	113	113	172	175
CMad_068	Madera (1)	2013	197	201	188	188	128	130	156	158	184	184	127	127	143	143	176	178	158	162	182	191	95	113	166	175
CMad_069	Madera (1)	2013	197	209	188	188	128	130	148	159	184	188	121	121	137	143	168	172	162	162	182	188	113	113	148	175
CMad_070	Madera (1)	2013	209	209	188	188	128	130	158	161	184	184	115	121	115	143	172	176	158	168	191	191	113	113	175	175
CMad_071	Madera (1)	2013	209	209	188	188	128	128	158	159	184	184	117	121	143	145	176	178	158	162	182	182	113	113	172	172
CMad_072	Madera (1)	2013	197	197	188	188	128	130	148	157	184	184	115	121	115	137	178	178	162	162	191	194	113	113	148	166
CMad_090	Madera (1)	2013	197	209	188	188	128	128	157	160	184	184	127	127	115	137	176	178	158	162	182	191	113	113	172	172
CMad_091	Madera (1)	2013	197	197	188	188	128	130	156	158	184	184	121	121	133	143	178	178	162	168	182	182	113	113	166	175
CMad_092	Madera (1)	2013	197	209	188	188	130	130	148	157	184	188	121	127	115	137	178	178	162	162	182	191	113	113	148	175
CMad_094	Madera (1)	2013	197	209	188	188	128	128	148	160	184	184	121	121	115	115	176	178	162	162	182	194	113	113	166	166
CMad_095	Madera (1)	2013	197	209	188	188	128	128	148	160	184	184	121	121	115	143	176	178	162	162	182	194	113	113	166	166
Mad1_001	Madera (2)	2013	197	209	184	188	128	128	148	154	184	184	115	121	143	143	172	176	162	162	182	182	113	113	166	166
Mad1_002	Madera (2)	2013	209	209	188	188	128	130	148	154	184	188	115	121	143	143	168	176	158	162	188	194	113	113	166	175
Mad1_003	Madera (2)	2013	201	209	188	188	128	130	156	158	184	188	121	127	143	143	168	178	158	168	182	191	113	113	148	172
Mad1_004	Madera (2)	2013	201	209	188	188	128	130	148	159	188	188	117	121	143	143	178	178	158	168	188	191	113	113	166	175
Mad1_005	Madera (2)	2013	197	209	188	188	128	130	159	160	184	184	121	121	115	143	168	178	162	168	188	191	113	113	166	175
Mad1_006	Madera (2)	2013	197	209	188	188	128	130	148	159	184	188	121	127	143	143	172	178	158	162	191	194	113	113	166	175
Mad1_007	Madera (2)	2013	197	209	188	188	130	130	159	160	184	184	121	127	143	145	178	178	158	168	188	191	113	113	175	175
Mad1_008	Madera (2)	2013	197	209	188	188	130	130	156	158	184	184	127	127	115	143	166	178	158	158	182	182	113	113	175	175
Mad1_009	Madera (2)	2013	197	201	188	188	130	130	158	159	188	188	121	127	115	143	178	178	158	168	188	191	113	113	166	175
Mad1_010	Madera (2)	2013	197	201	188	188	128	128	159	159	184	184	121	127	115	143	176	178	158	158	182	191	113	113	175	175
Mad1_011	Madera (2)	2013	209	209	184	188	128	128	156	160	184	188	117	127	115	115	172	178	162	168	182	191	113	113	166	175
Mad1_012	Madera (2)	2013	197	209	188	188	128	130	158	158	184	188	121	127	115	143	178	178	162	168	182	191	113	113	166	175
Mad1_013	Madera (2)	2013	197	209	188	188	130	130	159	160	184	184	121	127	115	145	168	178	158	168	188	191	113	113	175	175
Mad1_014	Madera (2)	2013	209	209	188	188	128	130	148	156	188	188	117	121	115	143	172	176	158	162	182	191	113	113	166	175
Mad1_015	Madera (2)	2013	197	197	188	188	128	130	148	158	184	184	115	121	115	115	172	176	158	162	182	191	113	113	166	175
Mad1_016	Madera (2)	2013	197	209	188	188	128	130	156	158	184	184	117	121	115	133	168	178	158	162	182	194	113	113	166	175
Mad1_017	Madera (2)	2013	197	209	188	190	128	128	159	159	184	184	121	127	133	143	168	178	158	162	188	191	113	113	166	175
Mad1_018	Madera (2)	2013	197	209	188	188	130	130	158	159	184	184	117	127	115	143	168	172	158	168	182	191	113	113	148	175
Mad1_019	Madera (2)	2013	197	201	188	190	128	130	148	159	184	188	127	127	143	143	168	178	162	168	182	182	113	113	148	172
Mad1_020	Madera (2)	2013	209	209	188	188	128	128	156	160	184	188	121	127	115	143	178	178	158	168	182	182	113	113	172	175
Mad1_021	Madera (2)	2013	201	209	188	188	128	128	148	159	184	188	121	127	137	143	168	178	158	162	182	182	113	113	172	172
Mad1_022	Madera (2)	2013	209	209	188	188	128	130	148	159	184	184	117	117	115	143	166	176	158	162	182	191	113	113	166	175
Mad1_023	Madera (2)	2013	197	197	188	188	128	130	148	158	184	184	115	121	115	115	172	176	158	162	182	191	113	113	166	175
Mad1_024	Madera (2)	2013	197	201	188	188	130	130	158	158	184	188	121	127	143	143	178	178	158	168	188	191	113	113	166	175
Mad1_025	Madera (2)	2013	197	209	188	188	128	128	148	148	184	188	121	127	115	115	168	178	162	168	182	188	113	113	172	175
Mad1_026	Madera (2)	2013	197	209	184	188	128	130	148	160	184	184	115	127	143	145	176	178	158	162	182	191	113	113	175	175
Mad1_027	Madera (2)	2013	197	209	188	188	130	130	148	158	184	188	121	127	115	143	168	176	158	168	191	191	113	113	148	175
Clovis_001	Clovis (1)	2013	197	209	186	186	128	128	158	164	184	184	115	115	115	129	166	166	158	171	182	188	113	113	166	175
Clovis_002	Clovis (1)	2013	197	209	186	186	128	128	158	164	184	184	115	115	115	115	166	166	158	171	182	191	113	113	166	175
Clovis_003	Clovis (1)	2013	201	201	186	188	128	128	158	158	184	184	115	117	115	129	168	168	158	171	182	182	113	113	172	172
Clovis_004	Clovis (1)	2013	197	201	188	188	128	128	164	164	184	184	117	117	115	129	178	178	158	171	182	182	113	113	166	175
Clovis_005	Clovis (1)	2013	195	201	188	188	128	128	158	161	184	184	117	117	115	115	178	178	158	171	182	188	113	113	166	175
Clovis_006	Clovis (1)	2013	197	201	188	188	128	128	164	164	184	184	117	117	129	129	178	178	158	171	182	182	113	113	166	175
Clovis_007	Clovis (1)	2013	197	209	186	188	128	128	164	164	184	184	115	117	115	115	166	166	158	171	182	188	113	113	166	175
Clovis_008	Clovis (1)	2013	197	201	188	188	128	128	156	164	184	184	117	117	115	129	166	168	158	158	182	182	113	113	166	172
Clovis_009	Clovis (1)	2013	195	201	186	186	128	128	158	161	184	188	115	115	115	129	166	166	158	168	182	188	113	113	172	175
Clovis_010	Clovis (1)	2013	197	197	186	188	128	128	156	156	184	184	115	117	115	129	178	178	158	171	182	182	95	113	166	175
Clovis_011	Clovis (1)	2013	197	197	186	186	128	128	157	161	184	188	115	115	115	129	172	178	168	168	182	188	113	113	172	172
Clovis_012	Clovis (1)	2013	197	201	186	186	128	128	158	164	184	184	115	115	115	129	168	172	158	171	182	182	113	113	166	175
Clovis_013	Clovis (1)	2013	197	201	186	188	128	128	161	164	184	188	115	117	129	129	166	176	168	168	182	182	113	113	172	172
Clovis_014	Clovis (1)	2013	197	201	188	188	128	128	158	160	184	184	117	117	115	129	170	172	168	171	182	182	113	113	166	166
Clovis_015	Clovis (1)	2013	195	197	188	188	128	128	156	161	184	184	117	117	129	129	168	178	158	168	188	188	113	113	166	175
Clovis_016	Clovis (1)	2013	195	197	186	188	128	128	158	164	184	184	115	119	115	129	166	172	158	171	182	191	113	113	166	175
Clovis_017	Clovis (1)	2013	197	201	184	188	128	128	158	164	184	184	117	119	117	129	170	178	168	171	188	191	113	113	166	166
Clovis_018	Clovis (1)	2013	197	197	188	188	128	128	156	158	184	184	117	117	115	129	178	178	171	171	182	188	95	113	166	166
Clovis_019	Clovis (1)	2013	195	197	188	188	128	128	156	158	184	184	117	117	129	129	168	168	158	168	191	194	113	113	175	175
Clovis_020	Clovis (1)	2013	197	201	186	188	128	128	156	156	184	184	115	117	115	115	166	166	158	171	182	194	113	113	166	172
Clovis_029	Clovis (1)	2013	195	201	186	188	128	128	158	158	184	184	115	117	115	129	166	166	158	158	182	188	113	113	172	175
Clovis_030	Clovis (1)	2013	197	201	186	188	128	128	158	160	184	184	115	117	117	129	168	176	158	171	182	191	113	113	172	172
Clovis_031	Clovis (1)	2013	197	201	186	188	128	128	156	158	184	184	115	117	115	129	166	176	158	171	182	188	113	113	166	172
Clovis_032	Clovis (1)	2013	195	197	186	188	128	128	156	158	184	184	115	117	115	117	168	178	158	168	188	188	113	113	172	175
Clovis_033	Clovis (1)	2013	197	197	188	188	128	128	156	158	184	184	117	117	115	115	168	178	168	168	182	188	95	113	166	175
Clovis_034	Clovis (1)	2013	197	201	186	186	128	128	156	158	184	184	115	119	115	129	166	166	158	168	188	194	113	113	166	175
Clovis_035	Clovis (1)	2013	197	201	184	188	128	128	156	158	184	184	119	127	129	129	170	178	158	168	182	188	113	113	172	172
Clovis_036	Clovis (1)	2013	195	197	184	186	128	128	158	158	184	184	119	119	115	129	166	178	158	171	188	191	95	113	166	172
Clovis_038	Clovis (1)	2013	197	201	184	188	128	128	158	158	184	184	117	119	129	129	166	166	158	168	182	191	113	113	166	172
Clovis_039	Clovis (1)	2013	195	195	188	188	128	128	156	158	184	184	117	117	129	129	166	176	158	171	182	188	113	113	166	175
Clovis_040	Clovis (1)	2013	195	197	184	186	128	128	156	157	184	184	115	119	129	129	172	176	158	158	182	182	113	113	172	175
Clovis_041	Clovis (1)	2013	197	201	184	186	128	128	157	158	184	184	115	119	129	129	166	168	158	168	182	191	113	113	172	175
Clovis_042	Clovis (1)	2013	197	201	184	184	128	128	157	158	184	184	119	119	115	129	172	178	158	168	182	191	113	113	172	172
Clovis_043	Clovis (1)	2013	201	201	184	188	128	128	158	158	184	184	117	119	115	115	172	176	158	168	182	182	113	113	172	175
Clovis_044	Clovis (1)	2013	197	197	184	188	128	128	158	160	184	184	117	119	129	129	166	168	158	171	188	191	113	113	166	172
Clovis_045	Clovis (1)	2013	201	201	188	188	128	128	158	164	184	184	117	117	129	129	166	166	158	158	182	191	113	113	172	175
Clovis_046	Clovis (1)	2013	195	195	186	188	128	128	158	164	184	184	115	119	115	115	166	172	158	171	191	191	113	113	175	175
Clovis_047	Clovis (1)	2013	201	201	188	188	128	128	158	164	184	184	127	127	129	129	168	168	171	171	182	182	113	113	166	166
Clovis_048	Clovis (1)	2013	195	197	188	188	128	128	156	158	184	188	117	119	129	129	166	178	158	158	182	188	113	113	175	175
Clovis_049	Clovis (1)	2013	195	195	186	188	128	128	161	161	188	188	115	117	129	129	178	178	158	171	182	182	113	113	166	175
Clovis_050	Clovis (1)	2013	197	201	186	188	128	128	158	158	184	184	117	119	115	129	166	166	158	158	188	191	113	113	172	175
Clovis_051	Clovis (1)	2013	195	197	188	188	128	128	156	164	184	184	117	117	115	129	166	176	158	158	182	191	113	113	175	175
Clovis_052	Clovis (1)	2013	195	201	188	188	128	128	156	158	184	184	117	117	115	129	170	176	158	158	182	191	113	113	166	166
Clovis_053	Clovis (1)	2013	197	201	188	188	128	128	156	164	184	184	117	117	115	129	170	170	158	158	182	188	113	113	166	172
Clovis_054	Clovis (1)	2013	195	197	188	188	128	128	156	164	184	184	117	117	129	129	166	166	158	158	182	191	113	113	175	175
Clovis_055	Clovis (1)	2013	195	197	188	188	128	128	156	160	184	184	117	117	115	129	166	176	158	158	182	182	113	113	175	175
Clovis_056	Clovis (1)	2013	195	201	188	188	128	128	156	156	184	184	117	117	129	129	176	176	158	171	182	188	113	113	166	175
Clovis_057	Clovis (1)	2013	201	201	188	188	128	128	156	164	184	184	117	117	115	129	170	176	158	158	182	188	113	113	166	175
Clovis_058	Clovis (1)	2013	195	201	188	188	128	128	158	158	184	184	117	117	129	129	176	176	158	158	182	188	113	113	166	175
Clovis_059	Clovis (1)	2013	197	201	188	188	128	128	156	164	184	184	117	117	115	115	166	178	168	171	182	191	95	113	166	166
Clovis_060	Clovis (1)	2013	197	201	188	188	128	128	156	158	184	184	117	127	115	115	166	168	158	158	182	182	113	113	172	172
Clovis_061	Clovis (1)	2013	195	209	188	188	128	128	164	164	184	184	117	117	129	129	170	178	171	171	182	182	113	113	166	166
Clovis_062	Clovis (1)	2013	195	197	186	188	128	128	156	158	184	184	119	127	115	129	178	178	158	171	182	182	95	113	166	175
Clovis_063	Clovis (1)	2013	197	209	186	188	128	128	157	164	184	184	115	117	129	129	166	168	158	171	182	191	113	113	166	175
Clovis_064	Clovis (1)	2013	197	197	184	186	128	128	158	158	184	184	115	119	129	129	172	178	158	158	182	188	113	113	172	175
Clovis_065	Clovis (1)	2013	197	197	188	188	128	128	156	164	184	184	117	117	115	115	166	166	158	171	182	182	113	113	175	175
Clovis_091	Clovis (1)	2013	195	197	184	188	128	128	157	157	184	184	117	119	129	129	166	170	158	171	188	188	95	113	166	175
Clovis_092	Clovis (1)	2013	195	197	184	188	128	128	158	158	184	184	117	119	129	129	166	172	158	171	188	191	95	113	172	175
Clovis_093	Clovis (1)	2013	197	201	188	188	128	128	156	158	184	184	117	117	129	129	178	178	158	158	182	182	113	113	172	175
Clovis_094	Clovis (1)	2013	195	201	188	188	128	128	156	157	184	184	117	117	129	129	176	176	171	171	182	188	113	113	166	166
Cal_001	Clovis (2)	2013	209	209	184	188	128	130	154	160	184	188	115	115	115	143	178	178	158	168	182	194	113	113	172	175
Cal_002	Clovis (2)	2013	209	209	188	188	128	130	148	158	184	184	115	117	133	143	172	178	158	168	182	191	113	113	175	175
Cal_003	Clovis (2)	2013	209	209	188	188	128	130	148	160	184	188	115	117	133	143	172	178	158	168	182	194	113	113	172	175
Cal_004	Clovis (2)	2013	209	209	184	188	128	130	154	158	184	184	115	127	133	143	172	178	158	168	182	191	113	113	172	175
Cal_005	Clovis (2)	2013	197	209	188	188	128	128	148	160	184	188	115	117	115	143	172	178	162	168	182	191	113	113	166	175
Cal_006	Clovis (2)	2013	209	209	184	188	128	130	154	160	184	188	115	115	115	143	178	178	158	168	182	194	113	113	172	175
Cal_007	Clovis (2)	2013	209	209	188	188	128	130	154	160	184	188	115	117	133	143	178	178	158	168	182	194	113	113	172	175
Cal_008	Clovis (2)	2013	209	209	188	188	128	130	154	158	184	184	117	127	115	143	178	178	158	168	182	194	113	113	172	175
Cal_009	Clovis (2)	2013	197	209	188	188	128	128	148	160	184	188	115	117	133	143	172	178	162	168	182	191	113	113	166	172
Cal_010	Clovis (2)	2013	197	209	184	188	128	128	148	158	184	184	115	115	133	143	172	178	162	168	182	194	113	113	166	172
Cal_011	Clovis (2)	2013	197	209	188	188	128	128	148	158	184	184	117	127	133	143	178	178	162	168	182	191	113	113	166	175
Cal_012	Clovis (2)	2013	209	209	188	188	128	130	154	158	184	184	117	127	133	143	178	178	158	168	182	194	113	113	172	175
Cal_013	Clovis (2)	2013	209	209	184	188	128	130	154	160	184	188	115	127	115	143	172	178	158	168	182	194	113	113	172	175
Cal_014	Clovis (2)	2013	195	211	188	188	128	128	158	161	184	188	117	127	129	129	166	176	158	171	182	188	113	113	166	166
Cal_015	Clovis (2)	2013	195	197	184	186	128	128	158	164	184	184	115	119	129	129	172	176	158	158	182	191	113	113	172	172
Cal_016	Clovis (2)	2013	197	197	188	188	128	128	157	157	184	184	117	117	129	129	176	178	158	171	182	191	113	113	166	172
Cal_017	Clovis (2)	2013	195	211	186	188	128	128	158	160	184	188	115	117	115	129	166	178	158	158	182	182	113	113	166	175
Cal_018	Clovis (2)	2013	197	197	184	184	128	128	157	157	184	184	119	119	115	129	166	172	158	158	188	191	113	113	166	172
Cal_019	Clovis (2)	2013	195	201	184	188	128	128	158	158	184	184	119	127	115	129	166	178	158	168	182	188	95	113	166	172
Cal_020	Clovis (2)	2013	195	197	188	188	128	128	158	164	184	184	117	127	129	129	172	178	158	168	182	188	95	113	166	166
Cal_021	Clovis (2)	2013	195	201	184	188	128	128	158	158	184	184	119	119	115	129	172	178	158	158	182	188	113	113	172	175
Cal_022	Clovis (2)	2013	197	201	188	188	128	128	158	158	184	184	119	127	115	129	168	178	158	168	182	191	113	113	166	172
Cal_023	Clovis (2)	2013	197	197	188	188	128	128	158	164	184	184	117	119	129	129	168	172	158	171	182	191	113	113	166	172
Cal_024	Clovis (2)	2013	195	201	184	186	128	128	156	160	184	184	115	119	129	129	168	172	158	168	182	188	113	113	166	172
Cal_025	Clovis (2)	2013	197	201	188	188	128	128	160	164	184	184	117	117	115	129	166	176	158	168	182	188	95	113	166	172
Cal_026	Clovis (2)	2013	195	197	184	188	128	128	157	157	184	184	119	119	115	115	166	172	158	158	182	191	95	113	172	175
Cal_027	Clovis (2)	2013	197	197	184	188	128	128	157	158	184	184	119	119	129	129	178	178	158	158	188	191	113	113	172	175
Cal_028	Clovis (2)	2013	197	197	184	188	128	128	158	158	184	184	119	127	115	129	170	172	158	171	182	191	113	113	166	172
Cal_029	Clovis (2)	2013	197	201	184	188	128	128	158	158	184	184	119	127	115	129	178	178	158	158	182	188	113	113	166	172
Cal_030	Clovis (2)	2013	197	197	188	188	128	128	158	158	184	184	117	127	129	129	166	170	158	171	188	191	113	113	172	172
Cal_031	Clovis (2)	2013	197	201	184	188	128	128	158	158	184	184	119	119	115	129	172	178	158	158	188	191	113	113	172	172
Cal_032	Clovis (2)	2013	195	201	184	186	128	128	158	158	184	184	115	119	129	129	166	170	158	168	182	188	113	113	166	175
Cal_033	Clovis (2)	2013	195	197	188	188	128	128	158	158	184	184	117	119	115	129	166	166	158	158	182	191	95	113	172	172
Cal_034	Clovis (2)	2013	195	197	184	188	128	128	157	164	184	184	117	117	115	129	166	172	158	158	188	188	113	113	175	175
Cal_035	Clovis (2)	2013	195	197	188	188	128	128	164	164	184	184	117	119	115	129	172	178	158	171	182	191	113	113	166	175
GLA_001	Los Angeles	2014	201	201	184	184	128	128	158	158	184	184	115	115	115	133	166	166	171	171	182	191	95	113	148	148
GLA_002	Los Angeles	2014	197	209	184	186	128	128	147	158	184	188	115	127	115	129	172	178	159	171	182	188	107	113	166	166
GLA_003	Los Angeles	2014	197	209	188	188	128	128	147	158	184	188	117	119	115	115	172	178	159	171	182	182	107	107	166	166
GLA_004	Los Angeles	2014	197	197	186	188	128	128	147	158	184	188	119	127	115	129	172	178	158	171	188	188	107	113	148	166
GLA_005	Los Angeles	2014	209	211	184	188	128	128	147	158	184	188	115	117	115	115	172	178	159	171	182	182	107	107	166	166
GLA_006	Los Angeles	2014	211	211	184	188	128	128	158	158	184	184	115	119	115	129	172	178	171	171	182	182	107	113	166	166
Az_001	Maricopa County	2013	197	197	186	188	128	128	148	157	184	188	115	119	115	131	168	168	168	168	182	182	113	113	148	175
Az_003	Maricopa County	2013	209	209	184	188	128	128	158	159	184	188	115	119	115	115	170	172	168	168	182	191	104	104	166	175
Az_004	Maricopa County	2013	197	209	188	188	128	128	148	161	188	188	117	117	115	133	172	176	158	168	182	182	113	113	148	172
Az_005	Maricopa County	2013	209	209	188	188	130	130	158	159	188	188	115	119	131	151	168	170	168	168	182	182	95	104	166	172
Az_006	Maricopa County	2013	197	197	184	188	128	128	148	161	184	188	117	117	115	115	172	176	158	168	182	191	107	113	175	175
Az_007	Maricopa County	2013	195	197	188	188	128	128	147	158	184	184	121	121	115	115	168	172	168	168	182	182	113	113	166	166
Az_008	Maricopa County	2013	197	201	188	188	128	128	158	161	188	188	117	119	115	131	170	172	168	168	182	182	104	113	148	166
Az_009	Maricopa County	2013	197	209	188	188	128	130	156	161	184	188	115	121	115	131	168	172	162	168	182	182	104	113	148	166
Az_010	Maricopa County	2013	201	201	184	184	128	128	158	159	184	184	117	117	115	115	168	172	168	171	182	188	113	113	166	172
Az_011	Maricopa County	2013	197	197	188	188	128	128	158	158	184	188	117	117	129	131	168	178	168	171	182	191	95	113	166	166
Az_012	Maricopa County	2013	197	209	188	188	128	128	159	159	188	188	117	119	115	131	172	172	162	171	182	182	113	113	166	172
Az_013	Maricopa County	2013	197	209	184	188	128	128	157	159	184	188	115	117	115	131	172	176	168	171	182	182	107	113	166	166
Az_014	Maricopa County	2013	201	209	188	188	128	128	156	159	188	188	119	121	115	115	172	172	168	171	182	182	113	113	148	172
Az_015	Maricopa County	2013	197	209	188	188	128	128	156	159	184	188	117	119	115	115	168	168	168	168	182	182	113	113	166	166
Az_016	Maricopa County	2013	195	209	184	188	128	130	156	159	184	184	115	119	115	139	176	178	168	168	182	182	95	104	166	166
Az_017	Maricopa County	2013	197	197	184	188	128	128	161	161	184	188	115	117	115	131	168	172	162	168	182	188	104	113	172	172
Az_018	Maricopa County	2013	209	209	186	188	128	128	156	159	184	188	117	119	115	131	168	172	168	171	182	182	104	104	166	175
Az_019	Maricopa County	2013	197	209	184	188	128	128	158	159	184	184	115	119	115	131	170	172	162	168	182	188	113	113	166	175
Az_020	Maricopa County	2013	197	209	186	188	128	130	158	159	184	188	117	119	115	115	168	168	168	168	182	182	95	95	148	166
Az_021	Maricopa County	2013	197	209	186	188	128	130	157	161	184	184	117	117	115	115	172	172	168	168	182	191	113	113	166	166
Az_022	Maricopa County	2013	197	209	188	188	128	128	159	161	184	184	117	117	115	129	172	178	162	168	182	191	95	113	166	166
Az_023	Maricopa County	2013	197	197	188	188	128	128	159	160	188	188	115	117	115	131	172	178	162	168	182	182	104	113	148	166
Az_024	Maricopa County	2013	197	197	184	188	128	128	159	159	184	184	115	117	115	115	176	178	168	168	182	182	95	113	166	166
Az_025	Maricopa County	2013	197	209	188	188	128	128	156	160	188	188	115	117	115	115	172	172	158	162	182	182	95	113	172	175
Az_026	Maricopa County	2013	197	201	188	188	128	128	158	161	184	184	119	119	115	115	168	176	158	168	182	182	95	95	166	175
Az_027	Maricopa County	2013	197	209	188	188	128	128	156	159	184	188	115	115	115	115	176	178	158	168	182	182	104	113	166	175
Az_028	Maricopa County	2013	197	197	184	184	128	128	148	161	184	184	115	115	115	117	168	176	168	168	182	191	113	113	148	175
Az_029	Maricopa County	2013	197	201	184	188	128	130	156	157	188	188	115	117	131	131	168	176	171	171	182	182	104	113	148	172
Az_030	Maricopa County	2013	197	209	188	188	128	128	157	158	184	188	115	121	115	153	168	172	168	168	182	182	104	113	172	172
Az_031	Maricopa County	2013	197	209	186	188	128	128	158	158	184	188	115	117	133	153	168	172	168	168	188	188	104	113	148	166
Az_032	Maricopa County	2013	197	197	184	188	128	130	159	159	184	188	115	117	115	115	168	172	168	168	182	182	113	113	148	166
Az_033	Maricopa County	2013	197	209	184	188	128	128	148	159	188	188	115	115	115	131	168	172	168	171	182	188	95	113	166	172
Az_034	Maricopa County	2013	201	201	188	188	128	130	159	159	184	184	115	115	115	115	168	172	158	162	182	182	104	113	166	175
Az_035	Maricopa County	2013	197	197	184	184	128	128	157	159	184	184	117	121	115	115	172	178	158	168	182	182	104	104	166	166
Az_036	Maricopa County	2013	209	209	186	188	128	128	159	159	184	184	115	119	115	131	168	168	158	171	188	191	95	113	166	172
Az_037	Maricopa County	2013	197	201	188	188	128	128	156	158	188	188	115	115	115	115	168	172	162	168	182	188	104	113	148	166
Az_038	Maricopa County	2013	197	209	184	188	128	128	159	160	184	184	115	119	115	131	168	176	168	171	182	191	113	113	148	148
Az_039	Maricopa County	2013	197	201	184	188	128	128	159	161	184	188	115	115	115	131	172	176	168	168	182	182	113	113	166	172
Az_040	Maricopa County	2013	197	209	184	188	128	128	159	159	184	188	115	117	115	151	168	178	158	168	188	188	113	113	166	166
Az_041	Maricopa County	2013	197	209	188	188	128	128	157	158	184	188	115	119	115	115	172	172	158	158	182	188	113	113	148	166
Az_042	Maricopa County	2013	197	209	184	188	128	128	159	159	184	188	115	117	115	115	168	172	158	168	182	182	113	113	166	166
Az_043	Maricopa County	2013	197	197	184	188	128	128	159	159	184	188	115	117	117	145	170	172	168	168	188	191	107	113	166	175
Az_044	Maricopa County	2013	201	209	188	188	128	128	157	158	184	188	115	115	115	131	176	178	162	168	182	191	113	113	166	175
Az_045	Maricopa County	2013	197	201	184	188	128	130	159	159	184	188	115	117	115	115	172	178	162	168	182	188	113	113	148	166
Az_046	Maricopa County	2013	209	209	184	188	128	128	159	160	184	184	115	115	115	131	172	178	168	168	182	191	104	113	166	166
Az_047	Maricopa County	2013	197	209	184	188	128	130	159	159	184	188	115	115	115	115	172	176	168	168	182	182	104	113	175	175
Az_048	Maricopa County	2013	197	209	184	188	128	130	158	159	184	184	115	119	115	115	176	178	162	168	182	182	104	113	166	175
Az_049	Maricopa County	2013	209	209	188	188	128	128	148	159	184	188	115	117	115	151	172	176	158	168	182	182	104	113	166	166
Az_050	Maricopa County	2013	195	209	188	188	128	128	159	159	184	188	115	121	115	115	172	172	158	158	191	191	113	113	166	175
Az_051	Maricopa County	2013	197	201	184	184	128	128	157	159	184	184	115	119	115	131	172	176	158	168	182	182	113	113	166	166
Az_052	Maricopa County	2013	201	209	184	188	128	128	159	159	184	184	119	121	133	133	170	172	158	168	-9	-9	95	113	166	166
Az_053	Maricopa County	2013	197	209	184	188	128	130	148	159	184	188	117	119	115	115	172	178	168	168	182	191	113	113	148	166
Az_054	Maricopa County	2013	197	209	186	186	128	128	148	161	184	188	115	117	117	117	172	176	158	168	182	182	104	113	166	166
TJC2_001	Tucson	2012	197	197	188	188	128	128	148	148	184	184	117	119	129	145	172	178	168	168	188	191	104	113	148	166
TJC2_002	Tucson	2012	197	197	186	188	128	128	148	159	184	188	115	119	115	131	168	176	158	168	182	182	107	113	148	166
TJC2_003	Tucson	2012	197	197	184	188	128	128	148	156	184	188	115	119	115	115	172	176	158	168	182	182	95	113	175	175
TJC2_004	Tucson	2012	197	201	184	188	128	128	148	159	184	188	115	119	115	131	168	176	168	171	182	182	107	113	166	175
TJC2_005	Tucson	2012	197	209	188	188	128	128	157	159	184	184	115	119	129	135	166	172	171	171	182	191	95	107	172	175
TJC2_006	Tucson	2012	197	201	188	188	128	128	148	158	184	188	117	119	129	145	172	178	168	168	188	191	113	113	148	166
TJC2_007	Tucson	2012	195	197	184	184	128	130	161	161	188	188	115	115	115	153	168	172	168	168	182	182	104	104	172	175
TJC2_008	Tucson	2012	195	197	184	184	128	128	161	161	188	188	115	115	115	153	172	178	168	168	182	182	104	113	172	175
TJC2_009	Tucson	2012	195	209	188	188	128	128	158	158	188	188	115	121	115	151	172	178	158	171	188	188	113	113	166	166
TJC2_010	Tucson	2012	197	197	184	188	128	128	148	159	184	184	115	115	115	129	168	178	158	168	188	188	104	113	166	175
TJC2_011	Tucson	2012	197	197	186	188	128	128	158	159	184	188	115	119	115	131	168	172	158	168	188	188	107	113	148	166
TJC2_012	Tucson	2012	197	201	186	188	128	128	148	159	184	188	115	119	115	131	168	172	168	168	188	188	107	113	166	166
TJC2_013	Tucson	2012	197	201	186	188	128	128	158	159	184	188	115	119	115	131	172	176	168	171	182	182	113	113	166	175
TJC2_014	Tucson	2012	197	201	184	188	128	128	148	159	184	188	115	115	115	131	172	172	168	168	188	188	107	113	166	166
TJC2_015	Tucson	2012	197	197	184	188	128	128	158	158	184	188	115	119	115	129	166	172	158	168	182	182	95	113	175	175
TJC2_016	Tucson	2012	197	197	186	188	128	128	148	159	184	188	115	119	115	131	172	176	158	171	182	182	113	113	148	175
TJC2_017	Tucson	2012	197	197	184	188	128	128	158	159	184	188	115	115	115	131	172	176	158	168	182	182	113	113	148	166
TJC2_018	Tucson	2012	197	197	184	188	128	128	148	159	184	188	115	115	115	131	172	176	168	168	188	188	113	113	148	166
TJC2_019	Tucson	2012	197	197	186	188	128	128	158	159	184	188	115	119	115	131	172	176	168	168	182	182	107	113	148	166
TJC2_020	Tucson	2012	197	197	188	188	128	128	148	159	184	188	115	115	131	151	178	178	158	162	188	188	104	107	172	175
TJC2_021	Tucson	2012	197	201	184	188	128	128	158	159	184	188	115	115	115	131	168	172	168	168	188	188	107	113	166	166
TJC2_022	Tucson	2012	197	197	184	188	128	128	158	159	184	188	115	115	115	131	168	176	158	171	188	188	107	113	148	175
TJC2_023	Tucson	2012	197	197	184	188	128	128	148	159	184	188	115	119	115	131	172	172	168	168	188	188	113	113	148	166
TJC2_024	Tucson	2012	197	197	186	188	128	128	158	159	184	188	115	119	115	131	168	172	168	171	188	188	107	113	148	175
TJC2_025	Tucson	2012	197	197	188	188	128	128	148	159	184	184	115	119	115	129	168	172	168	168	191	191	104	113	148	172
TJC2_026	Tucson	2012	197	197	184	188	128	128	158	159	184	188	115	115	115	131	168	172	158	171	188	188	107	113	148	175
TJC2_053	Tucson	2012	197	209	188	188	128	130	158	161	184	188	115	115	115	115	168	172	168	168	182	182	104	104	166	172
TJC2_054	Tucson	2012	197	197	184	188	128	128	148	159	184	188	115	115	115	131	172	172	158	168	188	188	113	113	148	166
TJC2_055	Tucson	2012	197	201	184	188	128	128	158	159	184	188	115	115	115	131	168	172	158	171	188	188	107	113	166	175
TJC2_056	Tucson	2012	197	209	186	188	128	128	157	159	184	188	115	115	117	131	172	172	162	171	190	190	113	113	172	175
TJC2_057	Tucson	2012	197	209	186	188	128	128	158	158	184	188	117	119	115	115	172	176	158	168	182	182	95	95	175	175
TJC2_058	Tucson	2012	197	197	186	188	128	128	158	159	184	188	115	119	115	131	168	172	158	171	182	182	113	113	148	175
TJC2_059	Tucson	2012	197	197	184	188	128	128	148	158	184	188	115	115	129	129	168	172	168	168	191	191	113	113	148	166
TJC2_060	Tucson	2012	197	201	184	188	128	128	148	159	184	188	115	115	115	131	168	172	168	171	188	188	107	113	166	166
TJC2_061	Tucson	2012	197	209	184	188	128	128	156	158	188	188	119	119	115	129	166	172	158	168	182	182	95	113	172	175
TJC2_062	Tucson	2012	197	201	184	188	128	128	148	158	184	188	115	117	129	129	172	172	158	168	191	191	113	113	172	175
TJC2_063	Tucson	2012	197	197	186	188	128	128	158	158	184	188	117	119	115	129	172	176	158	168	182	182	113	113	175	175
TJC2_064	Tucson	2012	197	209	188	188	128	130	158	158	184	188	115	119	151	153	172	178	158	158	188	188	113	113	166	166
TJC2_065	Tucson	2012	197	209	184	188	128	130	158	161	184	188	115	115	115	115	168	178	168	168	182	182	104	104	166	172
TJC2_066	Tucson	2012	209	209	184	188	128	128	156	158	188	188	119	119	115	129	166	172	158	168	182	182	95	113	172	175
TJC2_067	Tucson	2012	197	201	186	188	128	128	148	159	184	188	115	119	115	131	172	172	168	168	188	188	113	113	166	166
TJC2_068	Tucson	2012	195	197	188	188	128	130	158	161	184	188	115	115	115	153	168	172	168	168	182	182	104	104	172	175
TJC2_069	Tucson	2012	197	201	184	188	128	128	158	159	184	188	115	115	115	131	168	176	168	171	188	188	107	113	166	166
TJC2_070	Tucson	2012	197	209	188	188	128	130	148	161	184	188	115	115	115	153	168	172	168	168	182	182	104	104	166	172
TJC2_071	Tucson	2012	197	197	184	188	128	128	148	148	184	184	115	117	115	145	172	178	168	168	188	188	104	113	148	166
TJC2_072	Tucson	2012	197	209	188	188	128	130	158	161	184	188	115	115	115	115	172	172	168	168	182	182	104	113	166	172
TJC2_073	Tucson	2012	209	209	186	188	128	128	158	158	184	188	115	117	115	115	166	172	158	168	182	182	95	95	172	175
TJC2_074	Tucson	2012	197	201	186	188	128	128	148	159	184	188	115	119	115	131	168	176	168	168	188	188	107	113	166	166
TJC2_075	Tucson	2012	197	197	186	188	128	128	148	159	184	188	115	119	115	131	172	176	158	171	188	188	113	113	148	166
TJC2_076	Tucson	2012	197	201	184	188	128	128	148	158	184	188	115	117	115	129	168	172	158	168	188	188	104	113	172	175
TJC2_077	Tucson	2012	197	209	186	188	128	128	148	158	184	184	115	117	115	129	172	176	158	168	182	182	95	113	175	175
TJC2_078	Tucson	2012	197	197	186	188	128	128	148	159	184	188	115	119	115	131	172	176	158	171	182	182	107	113	148	175
TJC2_079	Tucson	2012	197	197	186	188	128	128	148	159	184	188	115	119	115	131	168	172	158	171	188	188	113	113	148	175
TJC2_080	Tucson	2012	197	197	184	188	128	128	158	158	184	188	117	119	115	129	166	172	158	168	182	182	95	113	175	175
Cruc_027	Las Cruces	2015	197	209	188	188	128	128	154	161	184	184	115	117	115	129	172	176	162	168	182	182	95	107	166	166
Cruc_028	Las Cruces	2015	197	201	188	188	128	128	156	161	184	184	115	117	115	151	172	178	162	162	182	182	107	113	166	166
Cruc_029	Las Cruces	2015	201	209	188	188	128	128	154	161	184	184	117	117	115	129	172	178	162	171	182	182	107	113	166	166
Cruc_030	Las Cruces	2015	197	197	188	191	128	128	157	159	184	184	119	119	115	115	168	178	162	168	191	191	107	113	166	166
Cruc_031	Las Cruces	2015	197	201	188	191	128	128	154	159	184	184	119	119	115	115	168	178	168	168	182	182	107	107	166	175
Cruc_032	Las Cruces	2015	197	201	188	191	128	128	157	159	184	184	119	119	115	131	168	172	168	168	182	182	113	113	166	175
Cruc_033	Las Cruces	2015	197	197	188	188	128	128	154	161	184	184	117	117	129	151	172	178	162	168	182	182	107	113	166	166
Cruc_034	Las Cruces	2015	197	197	188	188	128	128	156	161	184	184	115	117	129	151	168	178	162	168	182	182	107	113	166	166
Cruc_035	Las Cruces	2015	197	209	188	188	128	128	157	159	184	184	117	119	115	115	172	178	162	162	191	191	107	113	148	166
Cruc_036	Las Cruces	2015	197	197	188	188	128	128	161	161	184	184	115	117	115	115	168	176	162	168	182	182	95	107	166	166
Cruc_037	Las Cruces	2015	201	209	188	191	128	128	157	159	184	184	119	119	115	115	168	168	162	168	182	191	107	113	148	175
Cruc_038	Las Cruces	2015	197	201	188	188	128	128	156	161	184	184	117	117	115	115	168	176	162	162	182	182	95	107	166	166
Cruc_039	Las Cruces	2015	197	201	188	191	128	128	157	157	184	184	117	119	115	131	168	178	168	168	182	191	113	113	166	175
Cruc_040	Las Cruces	2015	197	209	188	188	128	128	161	161	184	184	115	117	115	115	168	176	162	168	182	182	95	107	166	166
Cruc_041	Las Cruces	2015	197	201	188	191	128	128	157	159	184	184	119	119	115	131	168	178	168	168	182	191	107	113	166	175
Cruc_042	Las Cruces	2015	201	209	188	191	128	128	154	159	184	184	117	119	115	115	168	172	162	168	182	191	107	113	148	175
Cruc_043	Las Cruces	2015	201	209	188	191	128	128	157	157	184	184	117	119	115	131	172	178	162	168	182	182	107	113	148	175
Cruc_044	Las Cruces	2015	197	201	188	191	128	128	154	159	184	184	119	119	115	131	168	168	168	168	182	191	113	113	166	175
Cruc_045	Las Cruces	2015	201	209	188	191	128	128	154	157	184	184	119	119	115	115	172	178	168	168	182	182	107	107	148	175
Cruc_046	Las Cruces	2015	197	209	188	191	128	128	157	159	184	184	119	119	115	131	168	168	162	168	182	191	107	107	148	166
Cruc_047	Las Cruces	2015	197	197	188	188	128	128	161	161	184	184	117	117	115	115	172	176	162	168	182	182	95	107	166	166
Cruc_048	Las Cruces	2015	197	209	188	188	128	128	154	157	184	184	117	117	115	115	168	178	162	162	182	191	107	107	148	166
Cruc_049	Las Cruces	2015	197	201	188	188	128	128	154	161	184	184	115	117	129	151	168	178	162	168	182	182	107	113	166	166
Cruc_050	Las Cruces	2015	197	209	188	191	128	128	157	159	184	184	119	119	115	131	168	172	162	168	182	191	113	113	148	166
Cruc_051	Las Cruces	2015	197	209	188	191	128	128	154	157	184	184	117	119	115	115	168	178	162	162	182	191	104	107	148	166
Cruc_052	Las Cruces	2015	197	201	188	191	128	128	157	159	184	184	119	119	115	131	172	178	168	168	182	191	107	113	166	175
Cruc_053	Las Cruces	2015	197	197	188	191	128	128	154	159	184	184	119	119	115	131	168	168	162	168	191	191	110	113	166	166
Cruc_054	Las Cruces	2015	197	209	184	188	128	128	159	161	184	184	119	119	115	149	178	178	168	168	182	191	110	113	148	166
Cruc_055	Las Cruces	2015	197	209	188	188	128	128	156	161	184	184	119	119	115	149	178	178	168	168	182	191	110	113	166	166
Cruc_056	Las Cruces	2015	197	209	188	191	128	128	154	159	184	184	119	119	115	131	168	172	162	162	182	191	110	113	148	166
Cruc_057	Las Cruces	2015	201	209	188	191	128	128	157	159	184	184	119	119	115	131	168	172	162	168	191	191	110	113	148	175
Cruc_058	Las Cruces	2015	197	201	188	188	128	128	157	159	184	184	117	119	115	131	168	172	168	168	182	191	110	113	166	175
Cruc_059	Las Cruces	2015	197	209	188	188	128	128	157	159	184	184	117	119	115	131	168	178	162	162	182	191	107	113	148	166
Cruc_060	Las Cruces	2015	197	201	188	191	128	128	154	159	184	184	117	119	115	115	168	168	168	168	182	191	107	113	166	175
Cruc_061	Las Cruces	2015	197	209	184	188	128	128	156	158	184	184	119	119	115	149	178	178	162	168	182	191	107	113	166	166
Cruc_062	Las Cruces	2015	197	209	184	188	128	128	159	161	184	184	119	119	115	149	178	178	162	168	182	191	113	113	148	166
Cruc_063	Las Cruces	2015	197	209	188	191	128	128	157	157	184	184	117	119	115	131	172	178	162	162	191	191	107	113	148	166
Cruc_064	Las Cruces	2015	197	209	184	188	128	128	159	161	184	184	119	119	115	149	178	178	168	168	182	191	107	113	148	166
Cruc_065	Las Cruces	2015	197	209	188	188	128	128	159	161	184	184	119	119	115	149	178	178	162	168	182	191	113	113	148	166
Cruc_066	Las Cruces	2015	209	209	188	188	128	130	154	154	184	184	117	117	115	131	172	176	162	168	182	188	107	113	175	175
Cruc_067	Las Cruces	2015	209	209	188	188	128	130	158	158	184	188	115	115	131	131	168	176	162	162	182	191	107	113	166	175
Cruc_068	Las Cruces	2015	197	197	188	188	128	128	157	157	184	184	117	117	115	131	178	178	168	168	182	182	113	113	166	166
Cruc_069	Las Cruces	2015	197	209	188	188	128	128	157	157	184	184	117	127	115	115	168	178	162	168	182	182	113	113	166	166
Cruc_070	Las Cruces	2015	197	201	188	188	128	130	157	158	184	188	115	119	115	129	168	176	158	162	182	182	113	113	148	166
Cruc_071	Las Cruces	2015	195	197	188	188	128	130	154	158	184	188	117	119	117	131	166	168	162	162	182	188	113	113	166	166
Cruc_072	Las Cruces	2015	197	197	188	188	128	128	156	161	184	184	117	119	115	129	178	178	162	168	182	182	107	113	166	166
Cruc_073	Las Cruces	2015	197	201	188	188	128	128	154	156	184	184	121	121	115	149	178	178	162	168	182	191	113	113	166	172
Cruc_074	Las Cruces	2015	197	201	188	188	128	128	157	161	188	188	115	115	115	115	168	176	158	162	182	182	104	113	166	166
Cruc_075	Las Cruces	2015	197	209	184	188	130	130	158	158	184	184	115	119	131	149	168	176	158	168	188	191	95	95	166	175
Cruc_076	Las Cruces	2015	197	197	188	188	128	130	157	161	184	188	117	117	115	115	172	176	158	162	182	194	95	113	166	166
Cruc_077	Las Cruces	2015	195	209	188	188	128	130	157	161	184	188	119	127	115	131	168	178	162	162	182	182	107	113	166	166
Cruc_078	Las Cruces	2015	197	197	188	188	128	130	156	157	184	184	115	115	117	131	172	178	168	171	182	188	107	113	148	172
Cruc_079	Las Cruces	2015	209	209	188	188	128	130	152	158	184	188	119	127	117	131	176	178	158	162	182	182	113	113	166	166
Cruc_080	Las Cruces	2015	197	201	184	188	128	130	159	161	184	184	117	119	115	115	176	176	162	162	182	191	107	107	166	175
Houston_001	Houston	2011	209	209	184	188	128	128	157	159	184	184	115	117	115	115	172	178	168	171	182	182	113	113	166	175
Houston_002	Houston	2011	197	197	184	188	128	128	147	159	184	184	121	121	115	115	166	172	168	168	182	182	113	113	166	172
Houston_003	Houston	2011	209	209	184	188	128	128	157	159	184	184	115	117	115	115	172	178	168	168	182	182	113	113	166	166
Houston_004	Houston	2011	197	197	184	188	128	128	157	158	184	184	121	127	115	115	168	168	158	168	182	182	113	113	166	175
Houston_005	Houston	2011	197	209	188	188	130	130	147	158	184	184	115	119	115	115	172	178	158	171	182	188	113	113	172	172
Houston_006	Houston	2011	209	211	188	188	128	128	158	159	184	184	117	119	115	115	178	178	168	168	182	182	113	113	166	166
Houston_007	Houston	2011	197	197	188	188	128	128	157	158	184	184	121	127	115	117	168	172	158	168	182	182	113	113	166	175
Houston_008	Houston	2011	197	209	184	188	128	128	157	159	184	184	119	121	115	117	168	168	158	158	182	182	113	113	166	175
Houston_009	Houston	2011	197	209	188	188	128	128	147	159	184	184	117	117	115	115	172	178	168	168	182	182	113	113	166	166
Houston_010	Houston	2011	197	209	188	188	128	130	158	159	184	184	117	119	115	115	172	178	158	171	182	182	113	113	172	172
Houston_011	Houston	2011	209	209	188	188	128	130	158	159	184	184	115	117	115	129	172	178	168	171	182	182	113	113	166	166
Houston_012	Houston	2011	197	197	184	186	128	128	147	159	184	184	117	121	115	115	166	172	168	171	182	182	113	113	166	172
Houston_013	Houston	2011	209	209	188	188	128	128	157	159	184	184	115	117	115	129	172	178	168	171	182	182	113	113	166	166
Houston_014	Houston	2011	209	209	188	188	128	128	156	158	184	184	115	117	115	129	172	178	168	171	182	182	113	113	166	175
Houston_015	Houston	2011	209	209	184	188	128	128	156	158	184	184	115	117	117	129	172	178	168	171	182	182	113	113	166	175
Houston_016	Houston	2011	209	209	188	188	128	128	157	159	184	184	115	117	115	129	172	172	168	168	182	182	113	113	166	166
Houston_017	Houston	2011	209	209	184	188	128	130	157	159	184	184	115	117	115	129	172	172	168	171	182	182	113	113	166	166
Houston_018	Houston	2011	209	209	184	188	128	130	157	159	184	184	115	117	115	129	172	178	171	171	182	182	113	113	175	175
Houston_019	Houston	2011	197	197	188	188	128	128	158	158	184	184	117	121	115	117	172	178	162	168	182	191	113	113	166	175
Cam_001	Cameron County	2015	197	197	188	188	128	128	156	160	184	184	119	121	115	129	178	178	-9	-9	188	191	107	113	166	175
Cam_002	Cameron County	2015	197	209	188	188	128	128	160	160	184	184	117	119	115	115	178	178	158	158	191	191	113	113	166	166
Cam_003	Cameron County	2015	197	197	188	188	128	128	160	160	184	184	119	121	115	121	168	168	158	168	191	191	95	113	166	175
Cam_004	Cameron County	2015	197	197	188	188	128	130	157	157	184	184	117	121	115	131	168	168	158	168	188	188	113	113	166	175
Cam_005	Cameron County	2015	197	209	184	188	128	128	157	159	184	184	117	121	115	133	168	172	158	168	182	188	95	113	166	166
Cam_006	Cameron County	2015	197	197	188	188	128	128	157	157	184	184	117	121	115	133	168	178	158	168	182	188	95	113	166	166
Cam_007	Cameron County	2015	197	197	184	188	128	128	157	159	184	184	117	121	117	131	168	172	158	168	188	188	113	113	166	166
Cam_008	Cameron County	2015	197	209	188	188	128	128	160	160	184	184	119	121	115	115	178	178	158	158	188	191	113	113	166	166
Cam_009	Cameron County	2015	195	209	188	188	128	128	156	160	184	184	117	119	115	129	166	168	-9	-9	182	182	113	113	172	172
Cam_010	Cameron County	2015	197	209	188	188	128	128	156	160	184	184	119	121	115	121	178	178	158	158	191	191	113	113	166	166
Cam_011	Cameron County	2015	197	209	188	188	128	128	160	160	184	184	119	121	115	115	178	178	158	158	188	191	113	113	166	166
Cam_012	Cameron County	2015	197	197	188	188	128	128	157	159	184	184	117	121	115	133	168	168	158	168	182	188	95	113	166	166
Cam_013	Cameron County	2015	197	197	188	188	128	128	157	159	184	184	117	121	115	133	168	178	158	171	188	188	95	113	166	166
Cam_014	Cameron County	2015	197	209	188	188	128	128	157	157	184	184	117	121	115	133	168	168	158	171	182	188	95	113	166	166
Cam_015	Cameron County	2015	197	197	188	188	128	130	157	157	184	184	117	121	115	133	168	168	158	168	182	188	95	113	166	175
Cam_016	Cameron County	2015	197	209	188	188	128	128	157	157	184	184	117	121	117	131	168	172	158	171	182	188	113	113	166	166
Cam_017	Cameron County	2015	197	209	188	188	128	128	157	157	184	184	117	121	115	131	168	178	158	160	188	188	113	113	166	166
Cam_018	Cameron County	2015	197	209	188	188	128	128	156	160	184	184	119	121	115	129	178	178	158	158	188	191	107	113	166	166
Cam_019	Cameron County	2015	197	197	188	188	128	128	156	160	184	184	119	121	121	129	178	178	158	168	188	191	107	113	166	175
Cam_020	Cameron County	2015	197	197	188	188	128	130	157	157	184	184	117	121	117	133	168	178	158	168	188	188	95	113	166	175
Cam_021	Cameron County	2015	195	197	188	188	128	130	156	156	184	184	119	121	117	133	168	178	168	171	182	182	113	113	172	175
Cam_022	Cameron County	2015	195	197	188	188	128	128	157	160	184	184	119	121	115	121	168	178	158	171	182	191	113	113	166	175
Cam_023	Cameron County	2015	197	209	188	188	128	130	156	160	184	184	119	119	115	115	178	178	158	159	182	191	113	113	148	172
Cam_024	Cameron County	2015	197	197	184	186	128	128	156	157	184	188	119	119	129	129	172	172	158	168	182	188	113	113	166	166
Cam_025	Cameron County	2015	209	209	188	188	128	128	156	157	184	188	115	117	115	131	172	178	-9	-9	182	188	95	113	166	166
Cam_026	Cameron County	2015	195	197	188	188	128	128	157	160	184	184	119	121	129	133	168	178	158	171	182	188	113	113	166	175
Cam_027	Cameron County	2015	195	195	188	188	128	128	157	160	184	184	117	121	121	133	168	178	158	158	182	191	113	113	166	166
Cam_028	Cameron County	2015	195	209	188	188	128	128	148	159	184	184	117	117	115	121	166	168	168	168	188	188	113	113	166	175
Cam_029	Cameron County	2015	195	197	188	188	128	130	157	162	184	184	117	119	115	121	166	178	168	168	191	191	113	113	166	166
Cam_030	Cameron County	2015	209	209	188	188	128	128	156	157	184	184	117	117	115	135	168	178	168	171	182	188	113	113	166	166
Cam_031	Cameron County	2015	195	197	186	188	128	128	156	159	184	184	115	127	115	129	168	172	158	158	182	182	95	113	166	166
Cam_032	Cameron County	2015	197	209	188	188	128	130	157	159	184	184	117	119	115	131	168	178	158	159	182	182	113	113	148	172
Cam_033	Cameron County	2015	197	209	188	188	128	128	157	159	184	184	117	119	115	131	168	178	-9	-9	191	191	95	113	166	175
Cam_034	Cameron County	2015	197	197	188	188	128	128	156	156	184	184	119	121	117	133	168	178	158	168	182	191	95	113	166	172
Cam_035	Cameron County	2015	195	195	188	188	128	128	156	157	184	188	119	121	129	133	178	178	158	158	188	188	113	113	166	166
Cam_036	Cameron County	2015	197	209	186	188	128	128	147	157	184	184	121	121	129	133	178	178	158	171	182	182	113	113	166	166
Cam_037	Cameron County	2015	197	209	188	188	128	128	157	159	184	184	117	127	117	129	168	172	158	171	182	182	113	113	172	175
Cam_038	Cameron County	2015	197	209	184	188	128	128	157	157	184	184	117	119	115	115	168	176	168	171	182	188	113	113	175	175
Cam_039	Cameron County	2015	197	209	188	188	128	128	158	162	184	184	121	121	117	131	176	178	168	168	182	191	95	113	166	166
Cam_040	Cameron County	2015	197	211	184	188	128	128	156	158	184	184	117	119	129	129	176	178	158	168	182	182	113	113	166	172
Cam_041	Cameron County	2015	197	197	188	188	128	128	157	157	184	184	119	121	129	129	172	178	-9	-9	182	182	107	113	172	175
Cam_042	Cameron County	2015	197	197	188	188	128	128	157	157	184	184	117	119	115	115	168	172	158	168	182	182	113	113	166	166
Cam_043	Cameron County	2015	195	209	188	188	128	128	156	160	184	184	117	119	115	135	168	176	171	171	182	182	113	113	166	172
Cam_044	Cameron County	2015	197	209	188	188	128	128	157	159	184	184	115	119	115	115	168	178	158	158	182	188	113	113	166	166
Cam_045	Cameron County	2015	197	197	186	188	128	128	147	157	184	184	115	119	129	133	178	178	158	158	188	191	113	113	166	166
Cam_046	Cameron County	2015	197	197	188	188	128	130	156	157	184	184	117	119	115	131	176	178	158	158	-9	-9	107	113	172	175
Cam_047	Cameron County	2015	197	197	184	188	128	128	156	159	184	184	117	121	115	129	172	178	158	158	182	188	113	113	166	166
Cam_048	Cameron County	2015	209	209	188	188	128	128	147	157	184	184	119	121	115	129	168	178	158	171	182	182	95	113	166	166
Cam_049	Cameron County	2015	197	197	188	188	128	128	157	157	184	184	117	121	117	133	172	178	-9	-9	182	188	95	113	166	166
Cam_050	Cameron County	2015	201	209	188	188	128	128	147	157	184	184	117	121	115	129	172	178	162	171	182	191	95	113	166	166
Cam_051	Cameron County	2015	197	209	188	188	128	128	147	157	184	184	115	119	117	131	172	172	158	158	182	182	95	113	166	166
Cam_052	Cameron County	2015	197	209	184	188	128	128	156	157	184	184	119	121	115	115	168	172	158	168	182	188	113	113	166	166
Cam_053	Cameron County	2015	197	197	188	188	128	128	156	158	184	184	117	117	115	115	168	168	158	171	182	188	113	113	166	178
Cam_054	Cameron County	2015	197	209	188	188	128	130	159	160	184	184	117	117	115	131	166	178	158	158	182	182	113	113	166	166
Cam_055	Cameron County	2015	197	209	188	188	128	128	159	159	184	184	119	121	115	131	168	172	158	162	182	182	113	113	166	166
Cam_056	Cameron County	2015	197	197	188	188	128	130	158	159	184	184	117	119	115	129	168	172	158	168	182	182	113	113	172	172
Cam_057	Cameron County	2015	197	209	188	188	128	128	157	158	184	184	117	121	129	129	168	178	-9	-9	182	182	113	113	166	166
Cam_058	Cameron County	2015	209	209	188	188	128	130	152	156	184	184	115	121	115	131	172	178	158	168	188	188	113	113	166	175
Cam_059	Cameron County	2015	195	197	188	188	128	128	156	159	184	184	117	117	115	117	168	178	158	158	182	191	113	113	166	175
Cam_060	Cameron County	2015	197	209	188	188	128	128	157	157	184	184	119	121	131	133	168	172	168	171	182	182	95	113	166	175
Dall_001	Dallas County	2015	209	209	184	188	128	130	156	164	184	184	115	115	115	115	168	172	158	168	182	191	113	113	148	175
Dall_002	Dallas County	2015	197	209	184	188	128	128	157	158	184	184	117	119	115	115	168	176	158	168	188	194	95	113	166	166
Dall_003	Dallas County	2015	201	209	188	188	128	130	156	158	184	184	115	117	115	115	166	166	158	171	191	194	113	113	175	175
Dall_004	Dallas County	2015	195	197	184	188	128	130	158	164	184	184	115	115	115	115	166	172	168	168	188	191	95	113	175	175
Dall_005	Dallas County	2015	197	197	188	188	128	130	159	159	184	184	119	121	131	131	166	166	158	171	182	182	113	113	166	175
Dall_006	Dallas County	2015	197	209	188	188	128	128	157	159	184	184	115	115	115	131	172	176	158	171	182	182	113	113	166	175
Dall_007	Dallas County	2015	197	209	184	188	128	128	157	158	184	184	117	117	115	133	168	176	168	168	182	194	113	113	166	166
Dall_008	Dallas County	2015	195	195	184	184	128	128	157	160	184	184	117	119	115	117	168	176	168	171	191	194	113	113	166	175
Dall_009	Dallas County	2015	197	201	184	188	128	130	156	157	184	184	115	121	115	115	166	178	168	168	188	188	113	113	166	175
Dall_010	Dallas County	2015	195	201	186	188	130	130	156	157	184	188	117	127	115	149	168	172	158	168	188	191	107	113	175	175
Dall_011	Dallas County	2015	201	209	188	188	128	130	161	164	184	184	115	115	115	131	166	168	158	171	182	182	113	113	148	166
Dall_012	Dallas County	2015	201	201	188	188	128	130	156	164	184	184	115	117	117	143	166	170	171	171	182	194	113	113	172	172
Dall_013	Dallas County	2015	197	209	188	188	128	130	157	159	184	184	115	127	115	115	172	176	158	158	182	182	113	113	166	166
Dall_014	Dallas County	2015	197	209	182	188	128	128	158	160	184	184	115	121	115	129	166	176	158	168	188	194	113	113	166	175
Dall_015	Dallas County	2015	197	209	188	188	128	130	157	162	184	188	115	117	133	145	168	176	158	168	188	188	113	113	175	175
Dall_016	Dallas County	2015	197	201	188	188	128	128	157	158	184	184	115	115	115	115	168	178	171	171	182	191	107	113	166	175
Dall_017	Dallas County	2015	195	197	184	188	128	130	158	160	184	188	115	115	115	115	168	176	168	168	188	191	113	113	175	175
Dall_018	Dallas County	2015	195	209	188	188	130	130	152	157	184	188	115	117	115	115	166	176	158	168	191	194	95	113	166	175
Dall_019	Dallas County	2015	197	197	184	188	128	130	157	158	184	184	115	121	115	115	168	178	158	168	188	188	113	113	166	166
Dall_020	Dallas County	2015	197	209	184	188	128	130	157	158	184	188	115	121	115	169	168	168	168	168	188	191	113	113	175	175
Dall_021	Dallas County	2015	197	201	188	188	130	130	159	160	184	184	115	117	115	115	168	172	168	171	191	191	113	113	166	166
Dall_022	Dallas County	2015	197	201	184	188	130	130	149	158	184	184	117	117	115	137	166	166	168	171	182	182	95	113	175	175
Dall_023	Dallas County	2015	197	197	188	188	130	130	158	159	184	188	119	119	115	115	166	172	168	171	182	188	113	113	175	175
Dall_024	Dallas County	2015	197	197	188	188	128	130	160	161	184	188	115	115	115	115	168	168	168	171	182	191	113	113	172	172
Dall_025	Dallas County	2015	197	201	188	188	128	128	161	164	184	184	115	115	115	131	166	166	168	171	182	191	113	113	148	175
Dall_026	Dallas County	2015	201	209	188	188	128	130	157	159	184	184	115	121	115	131	172	178	168	168	194	194	113	113	175	175
Dall_027	Dallas County	2015	197	197	186	188	128	130	148	160	184	184	115	121	117	117	166	178	168	168	194	194	113	113	166	175
Dall_028	Dallas County	2015	197	201	184	188	128	128	152	158	184	184	119	119	115	117	166	168	158	162	182	188	113	113	148	175
Dall_029	Dallas County	2015	193	197	188	188	128	130	157	160	184	184	115	121	115	117	166	172	168	168	191	191	113	113	166	175
Dall_030	Dallas County	2015	197	197	188	188	128	130	149	158	184	188	119	119	115	159	166	168	158	168	191	194	113	113	166	175
Dall_031	Dallas County	2015	201	209	184	188	128	130	147	159	184	184	115	115	115	117	172	176	158	171	191	191	107	113	175	175
Dall_032	Dallas County	2015	201	209	188	188	128	130	158	159	184	184	117	119	115	115	168	176	168	171	182	188	113	113	175	175
Dall_033	Dallas County	2015	197	209	188	188	128	128	156	160	184	184	115	117	115	115	168	168	158	168	182	188	113	113	166	175
Dall_034	Dallas County	2015	197	201	188	188	128	128	157	161	184	184	115	117	115	115	166	168	171	171	182	191	113	113	148	148
Dall_035	Dallas County	2015	197	209	188	188	128	128	159	159	184	184	115	119	117	131	168	178	171	171	188	191	113	113	175	175
Dall_036	Dallas County	2015	195	201	188	188	128	130	149	157	184	184	117	117	115	115	168	178	168	171	188	191	113	113	166	166
Dall_037	Dallas County	2015	197	209	188	188	128	128	159	159	184	188	115	115	117	133	166	178	168	168	182	182	107	113	166	166
Dall_038	Dallas County	2015	195	209	184	188	128	130	157	159	184	184	117	121	115	133	176	178	168	171	182	191	95	113	166	166
Dall_039	Dallas County	2015	197	209	188	188	128	128	157	160	184	184	115	119	115	133	168	178	168	171	182	188	113	113	-9	-9
Dall_040	Dallas County	2015	197	197	186	188	128	130	157	157	184	184	115	127	131	143	168	176	158	171	182	188	113	113	166	172
Dall_041	Dallas County	2015	195	209	184	188	128	128	159	159	184	184	117	119	115	149	168	178	168	168	182	188	113	113	148	148
Dall_042	Dallas County	2015	197	197	184	188	128	128	157	160	184	184	115	115	115	117	166	168	168	171	182	188	113	113	166	166
Dall_043	Dallas County	2015	195	197	184	188	128	130	152	159	184	188	115	117	117	117	168	176	158	168	182	188	113	113	166	175
Dall_044	Dallas County	2015	197	209	188	188	128	130	157	158	184	184	115	121	115	115	168	172	168	171	188	191	95	113	175	175
Dall_045	Dallas County	2015	195	201	188	188	128	128	157	158	184	184	115	119	115	131	176	178	168	171	182	182	113	113	148	166
Dall_046	Dallas County	2015	201	209	188	188	128	128	159	160	184	184	115	117	115	119	168	178	168	171	188	194	113	113	175	175
Dall_047	Dallas County	2015	201	201	186	188	128	128	147	157	184	188	117	119	117	149	166	176	168	171	182	182	113	113	166	175
Dall_048	Dallas County	2015	195	209	184	188	128	128	159	161	184	184	115	115	115	115	172	178	158	158	182	182	113	113	166	166
Dall_049	Dallas County	2015	209	209	188	188	128	130	159	161	184	184	115	115	129	131	168	172	158	168	188	191	113	113	175	175
Dall_050	Dallas County	2015	195	197	188	188	128	130	159	160	184	184	115	115	115	115	172	172	171	171	182	191	95	95	166	175
Dall_051	Dallas County	2015	201	209	184	188	128	128	159	159	184	184	115	121	115	149	178	178	158	168	191	194	113	113	166	175
Dall_052	Dallas County	2015	201	201	184	188	130	130	158	159	184	184	117	121	115	115	168	178	168	171	182	194	113	113	175	175
Dall_053	Dallas County	2015	195	209	184	188	128	128	159	161	184	184	115	115	117	117	172	176	158	168	182	182	113	113	166	166
Dall_054	Dallas County	2015	197	209	188	188	128	128	159	159	184	184	115	127	115	131	168	176	168	168	182	182	113	113	166	175
Dall_055	Dallas County	2015	197	201	188	188	128	130	156	166	184	184	115	117	115	115	168	168	168	171	182	194	113	113	166	175
Dall_056	Dallas County	2015	197	209	188	188	128	128	147	158	184	184	115	127	115	117	166	176	168	171	182	188	113	113	166	175
Dall_057	Dallas County	2015	197	197	188	188	130	130	149	157	184	184	115	115	115	115	170	178	168	171	188	191	113	113	166	172
Dall_058	Dallas County	2015	197	209	188	188	128	130	157	157	184	184	115	117	117	143	168	170	168	171	182	182	113	113	172	175
Dall_059	Dallas County	2015	197	209	188	188	128	130	159	160	184	184	117	119	115	117	178	178	168	168	191	194	113	113	166	175
Dall_060	Dallas County	2015	197	209	188	188	128	128	159	159	184	184	115	127	115	115	168	176	168	171	182	182	113	113	175	175
NO_001	New Orleans	2011	195	197	188	188	128	128	147	160	-9	-9	115	117	-9	-9	172	172	171	171	191	191	95	107	172	175
NO_002	New Orleans	2011	195	201	184	184	128	128	147	154	188	188	117	117	115	115	168	178	156	158	182	188	113	113	166	175
NO_003	New Orleans	2011	195	197	188	188	128	130	157	159	184	184	117	117	115	129	168	172	158	168	182	191	104	107	166	175
NO_004	New Orleans	2011	195	195	188	188	128	130	156	160	184	188	115	117	115	143	170	176	168	171	182	182	107	113	166	166
NO_005	New Orleans	2011	197	209	188	188	128	128	158	158	184	184	115	121	115	117	-9	-9	158	168	188	191	113	113	166	166
NO_006	New Orleans	2011	195	209	184	188	128	130	157	159	184	184	121	121	119	143	172	178	168	168	191	191	113	113	166	175
NO_007	New Orleans	2011	197	197	-9	-9	128	128	147	147	184	188	117	119	115	115	168	178	162	162	182	188	113	113	166	175
NO_008	New Orleans	2011	197	197	186	188	128	128	159	160	184	188	115	117	129	145	172	172	159	171	191	191	95	107	166	175
NO_009	New Orleans	2011	195	209	-9	-9	128	130	147	156	184	184	115	115	115	129	176	176	156	158	188	188	95	113	166	175
NO_010	New Orleans	2011	195	197	188	188	128	130	157	159	184	184	117	117	115	133	168	170	158	168	182	191	113	113	166	175
NO_011	New Orleans	2011	195	201	186	188	128	128	154	161	184	188	115	121	115	129	172	176	168	171	191	191	113	113	166	166
NO_012	New Orleans	2011	195	197	188	188	128	130	147	159	184	188	121	121	115	115	170	178	158	168	191	191	95	113	166	175
NO_013	New Orleans	2011	195	197	-9	-9	128	130	156	156	184	184	119	121	115	149	170	178	-9	-9	188	188	95	113	166	172
NO_014	New Orleans	2011	195	197	188	188	128	130	158	161	184	184	121	121	115	129	170	172	158	168	181	181	113	113	166	166
NO_015	New Orleans	2011	195	197	184	188	128	128	147	156	184	184	115	121	117	141	172	178	171	171	191	191	107	113	172	175
NO_016	New Orleans	2011	195	197	184	188	128	128	157	159	184	184	115	121	119	129	166	178	168	171	194	194	113	113	166	166
NO_017	New Orleans	2011	197	197	186	188	130	130	156	163	184	188	119	121	115	115	170	178	158	168	191	191	113	113	166	166
NO_018	New Orleans	2011	197	201	188	188	130	130	159	162	184	188	121	121	115	117	172	178	168	171	182	188	113	113	166	166
NO_019	New Orleans	2011	195	197	186	188	128	130	147	159	184	188	117	119	115	115	170	176	158	168	191	191	95	113	166	175
NO_020	New Orleans	2011	197	197	188	188	130	130	156	158	184	184	115	117	115	115	176	176	171	171	182	182	95	113	166	166
NO_021	New Orleans	2011	195	197	184	188	128	128	147	147	184	188	117	119	115	129	170	176	156	158	182	182	113	113	166	166
NO_022	New Orleans	2011	195	201	184	188	130	130	147	156	184	184	115	121	117	129	176	178	168	168	194	194	113	113	166	175
NO_023	New Orleans	2011	195	197	188	188	130	130	156	158	184	184	115	121	115	115	170	178	158	168	191	191	113	113	166	166
NO_024	New Orleans	2011	197	209	188	188	128	128	158	158	184	188	117	121	117	143	172	178	158	168	182	182	95	113	175	175
NO_025	New Orleans	2011	195	197	-9	-9	128	130	156	156	184	184	119	121	115	115	166	176	-9	-9	188	188	95	113	166	166
NO_026	New Orleans	2011	197	197	184	188	128	130	158	160	188	188	117	119	115	115	172	178	159	171	182	194	113	113	166	166
NO_027	New Orleans	2011	197	197	188	188	128	128	148	164	184	184	115	119	115	115	168	178	158	162	182	188	113	113	166	175
NO_028	New Orleans	2011	197	197	184	184	128	130	148	155	188	188	117	117	115	115	170	178	162	162	182	182	113	113	166	175
NO_029	New Orleans	2011	197	197	186	186	128	128	148	159	184	188	115	119	115	115	176	178	168	168	191	191	95	113	175	175
NO_030	New Orleans	2011	201	209	188	188	130	130	158	159	184	184	121	121	115	129	170	172	158	171	182	188	107	113	166	166
NO_031	New Orleans	2011	195	201	188	188	128	128	160	164	184	184	117	119	115	129	172	176	168	171	191	191	113	113	166	166
NO_032	New Orleans	2011	195	201	186	188	128	130	161	164	184	184	115	119	115	129	172	176	158	159	188	191	113	113	166	166
NO_033	New Orleans	2011	197	197	186	188	130	130	156	163	184	188	119	121	115	115	170	176	158	168	191	191	113	113	166	166
NO_034	New Orleans	2011	195	195	188	188	130	130	156	159	184	188	117	121	115	115	170	178	168	171	182	194	113	113	166	166
NO_035	New Orleans	2011	195	197	188	188	128	130	-9	-9	188	188	117	121	115	115	170	176	158	168	191	191	95	113	166	175
NO_036	New Orleans	2011	195	197	184	188	128	128	147	163	184	184	115	117	115	129	168	178	158	162	188	188	113	113	166	166
NO_037	New Orleans	2011	197	209	188	188	130	130	147	159	184	184	117	121	117	129	172	176	162	171	182	188	95	113	166	175
NO_038	New Orleans	2011	197	201	184	188	130	130	147	147	184	188	117	119	115	129	170	176	156	162	182	188	113	113	175	175
NO_039	New Orleans	2011	197	209	184	188	128	130	157	159	184	184	121	121	119	143	166	176	168	171	194	194	113	113	172	175
NO_040	New Orleans	2011	207	209	188	188	130	130	156	158	184	188	117	121	115	117	170	170	168	168	191	191	107	113	166	166
NO_041	New Orleans	2011	195	195	188	188	128	130	159	159	184	184	115	117	115	115	178	178	168	171	182	194	113	113	166	166
NO_042	New Orleans	2011	195	197	186	188	128	128	157	159	188	188	115	117	117	129	172	172	159	171	191	191	113	113	172	175
NO_043	New Orleans	2011	195	197	188	188	128	128	158	158	184	184	115	117	115	115	176	178	158	168	188	188	95	113	166	175
NO_044	New Orleans	2011	195	197	184	188	128	128	147	147	184	188	117	119	115	115	168	178	158	162	188	188	113	113	166	166
NO_045	New Orleans	2011	195	201	186	188	128	128	161	164	184	188	115	119	115	129	172	176	168	171	191	191	113	113	166	166
NO_046	New Orleans	2011	195	209	188	188	128	128	147	160	184	184	115	117	117	129	-9	-9	159	168	188	191	95	107	172	172
NO2_001	New Orleans	2012	197	197	188	188	128	128	159	160	184	188	115	115	117	149	172	178	168	168	191	191	104	107	166	175
NO2_002	New Orleans	2012	201	209	188	188	128	130	161	164	184	184	117	117	115	119	170	178	162	168	191	191	107	113	175	175
NO2_003	New Orleans	2012	195	209	184	188	128	128	157	159	184	188	117	119	115	115	166	172	158	171	191	191	113	113	175	175
NO2_004	New Orleans	2012	209	209	188	188	128	130	156	160	184	184	117	121	115	115	176	178	158	158	191	191	113	113	166	175
NO2_005	New Orleans	2012	197	209	184	188	128	130	157	159	184	188	119	121	115	116	172	178	158	158	188	191	113	113	166	166
NO2_006	New Orleans	2012	197	197	184	188	128	128	148	159	184	184	115	117	115	116	172	178	158	162	182	181	113	113	148	175
NO2_007	New Orleans	2012	195	197	188	188	128	130	156	161	188	188	117	121	115	115	168	170	156	168	188	191	113	113	166	175
NO2_008	New Orleans	2012	201	209	188	188	130	130	156	156	184	188	117	117	115	115	170	178	156	168	191	191	113	113	166	175
NO2_009	New Orleans	2012	201	209	188	188	128	130	156	160	184	188	115	121	115	115	168	180	168	168	188	188	113	113	175	175
NO2_010	New Orleans	2012	195	197	188	188	128	128	160	161	188	188	115	117	115	117	170	178	168	168	191	191	113	113	175	175
NO2_011	New Orleans	2012	197	209	186	188	128	130	154	160	184	184	115	121	115	163	170	176	158	168	191	191	107	113	175	175
NO2_012	New Orleans	2012	197	209	188	188	128	130	156	159	184	188	115	117	117	143	178	178	168	171	188	188	113	113	175	175
NO2_013	New Orleans	2012	201	209	184	188	128	130	159	163	184	188	117	121	141	149	170	178	158	159	182	188	113	113	175	175
NO2_014	New Orleans	2012	195	195	188	188	128	128	157	160	184	184	119	121	115	129	166	170	162	168	188	188	95	113	166	175
NO2_015	New Orleans	2012	197	209	188	188	128	130	158	160	188	188	115	119	115	129	178	178	158	158	188	188	113	113	175	175
NO2_016	New Orleans	2012	197	197	184	188	128	130	155	158	184	188	121	121	115	129	178	178	158	171	188	188	104	113	175	175
NO2_017	New Orleans	2012	197	201	188	188	128	130	159	159	184	188	121	121	115	143	170	178	158	168	191	194	113	113	166	175
NO2_018	New Orleans	2012	197	209	184	188	128	128	148	159	184	188	115	117	115	116	168	172	168	171	194	194	113	113	172	175
NO2_019	New Orleans	2012	195	197	184	188	128	130	148	154	184	184	115	117	115	141	168	172	162	168	194	194	113	113	166	175
NO2_020	New Orleans	2012	209	209	184	188	128	128	154	156	184	184	121	121	117	117	178	178	162	171	188	188	113	113	166	175
NO2_021	New Orleans	2012	197	197	184	188	128	128	154	156	184	184	121	121	115	115	170	178	158	168	182	182	113	113	175	175
NO2_022	New Orleans	2012	209	209	188	188	128	128	152	154	184	184	121	121	115	117	172	178	162	171	188	188	113	113	166	175
NO2_023	New Orleans	2012	195	195	188	188	128	130	154	159	184	188	119	121	117	129	170	178	162	171	188	191	113	113	166	175
NO2_024	New Orleans	2012	195	201	188	188	128	130	157	157	184	188	117	121	117	141	170	172	168	168	188	194	113	113	166	175
NO2_025	New Orleans	2012	197	209	184	188	128	128	154	156	184	188	115	121	115	129	170	178	168	168	194	194	113	113	166	175
NO2_026	New Orleans	2012	195	197	184	188	128	128	156	159	184	188	115	121	117	119	178	178	162	168	194	194	113	113	175	175
NO2_027	New Orleans	2012	195	195	186	188	128	128	159	160	184	184	115	115	117	117	168	176	168	171	188	191	113	113	175	175
NO2_028	New Orleans	2012	195	209	186	188	130	130	148	160	184	184	115	117	115	117	172	176	168	168	182	194	113	113	166	166
NO2_029	New Orleans	2012	195	209	186	188	128	130	147	160	184	184	119	119	115	116	178	178	168	168	182	191	113	113	166	172
NO2_030	New Orleans	2012	195	209	186	188	130	130	148	160	184	184	115	117	117	117	168	176	168	168	182	194	113	113	166	166
NO2_031	New Orleans	2012	197	209	188	188	128	130	148	159	184	184	117	123	115	115	166	170	158	171	182	188	107	113	175	175
NO2_032	New Orleans	2012	197	197	188	188	130	130	158	159	184	184	117	119	115	115	172	178	159	171	191	194	95	107	175	175
NO2_033	New Orleans	2012	197	209	188	188	128	128	159	161	184	188	115	121	115	141	170	170	158	168	182	188	113	113	175	175
NO2_034	New Orleans	2012	197	209	188	188	128	128	159	164	184	184	119	119	115	141	166	170	158	168	182	188	113	113	175	175
NO2_035	New Orleans	2012	195	197	188	188	128	130	159	164	188	188	117	121	115	141	170	172	159	171	182	182	95	113	166	175
NO2_036	New Orleans	2012	195	209	188	188	128	130	159	160	184	184	121	121	129	129	178	178	168	168	191	191	95	113	166	166
NO2_037	New Orleans	2012	195	209	188	188	128	130	156	159	184	184	121	121	115	129	178	178	168	171	191	191	95	113	166	175
NO2_038	New Orleans	2012	195	197	184	188	128	130	154	159	184	188	115	117	115	141	170	176	159	171	182	182	95	113	166	175
NO2_039	New Orleans	2012	197	197	184	188	128	130	160	164	186	188	115	121	115	117	170	172	168	171	182	182	113	113	166	175
NO2_040	New Orleans	2012	197	197	188	188	128	130	158	160	184	184	115	119	115	115	170	172	168	171	188	188	113	113	172	175
NO2_041	New Orleans	2012	195	209	188	188	128	130	156	159	184	184	119	121	129	131	166	178	168	171	188	188	113	113	166	175
NO2_042	New Orleans	2012	197	197	188	188	128	130	156	160	184	194	115	121	115	116	172	178	158	171	194	194	113	113	166	175
NO2_043	New Orleans	2012	197	197	188	188	128	130	156	159	184	184	117	121	115	117	172	178	158	168	194	194	113	113	175	175
NO2_044	New Orleans	2012	197	197	188	188	128	130	156	159	184	184	117	121	115	117	172	178	158	168	194	194	113	113	175	175
NO2_045	New Orleans	2012	197	197	188	188	128	130	156	159	184	184	117	121	115	141	172	178	158	171	194	194	95	113	166	175
NO2_046	New Orleans	2012	209	209	186	188	128	130	156	156	184	184	115	119	117	139	172	178	168	171	182	194	95	113	166	175
NO2_047	New Orleans	2012	197	209	188	188	128	128	154	159	184	188	115	121	115	115	168	178	168	168	182	191	95	113	166	175
NO2_048	New Orleans	2012	209	209	186	188	128	130	155	159	184	184	115	119	117	139	174	178	168	168	182	194	95	113	166	175
NO2_049	New Orleans	2012	195	197	184	188	128	128	158	158	184	184	117	121	115	143	170	178	162	168	191	191	113	113	175	175
NO2_050	New Orleans	2012	197	209	184	184	128	128	147	159	184	188	115	117	119	127	170	170	158	162	182	188	113	113	175	175
NO2_051	New Orleans	2012	195	209	188	188	128	128	159	160	184	184	117	121	115	119	166	178	158	168	191	191	113	113	175	175
NO2_052	New Orleans	2012	197	197	188	188	128	130	159	159	184	184	115	115	115	115	172	172	168	171	191	191	113	113	166	175
NO2_053	New Orleans	2012	197	209	188	188	128	128	156	160	184	184	117	121	115	115	170	178	158	162	188	188	113	113	148	175
NO2_054	New Orleans	2012	197	201	188	188	128	130	156	164	184	188	121	121	115	143	166	178	159	168	188	194	95	113	172	175
NO2_055	New Orleans	2012	197	209	188	188	128	130	157	158	184	184	117	119	117	137	170	178	156	168	182	181	95	113	166	175
NO2_056	New Orleans	2012	197	201	188	188	128	128	156	164	184	188	121	121	115	143	166	178	168	171	191	191	95	113	175	175
NO2_057	New Orleans	2012	195	209	184	186	128	130	159	159	188	188	117	121	115	133	178	178	158	168	188	191	107	113	175	175
NO2_058	New Orleans	2012	195	197	184	186	130	130	159	159	184	188	117	121	115	153	166	170	157	168	188	191	104	113	166	175
NO2_059	New Orleans	2012	195	197	184	184	130	130	147	159	188	188	117	121	115	133	170	178	157	168	191	191	113	113	166	175
NO2_060	New Orleans	2012	195	197	184	184	128	130	159	159	184	188	117	121	115	133	166	170	157	168	188	191	113	113	166	175
NO2_061	New Orleans	2012	195	209	184	184	128	130	159	159	184	188	117	121	115	133	166	170	158	168	188	188	113	113	175	175
NO2_062	New Orleans	2012	197	209	184	186	130	130	159	159	184	188	117	121	115	133	166	178	158	168	188	191	107	113	175	175
NO2_063	New Orleans	2012	195	209	184	184	128	130	147	159	188	188	117	121	115	153	166	170	158	168	188	191	104	113	175	175
NO2_064	New Orleans	2012	195	195	184	186	128	130	159	159	184	188	117	121	115	133	166	170	157	168	188	191	113	113	166	175
NO2_065	New Orleans	2012	195	195	186	188	128	130	147	159	188	188	119	121	115	153	166	178	158	168	191	191	104	107	166	175
NO2_066	New Orleans	2012	195	197	184	188	130	130	147	159	184	188	119	121	115	133	166	170	157	168	188	191	113	113	166	175
NO2_067	New Orleans	2012	195	197	186	188	130	130	147	159	188	188	119	121	115	133	166	178	157	168	188	191	107	113	166	175
NO2_068	New Orleans	2012	197	209	184	186	130	130	147	159	188	188	117	121	115	133	170	178	158	168	188	188	113	113	175	175
NO2_069	New Orleans	2012	195	195	186	188	128	130	147	159	188	188	119	121	115	153	166	170	157	168	191	191	104	113	166	175
NO2_070	New Orleans	2012	197	209	184	184	130	130	159	159	184	188	117	121	115	153	166	170	158	168	188	188	104	113	175	175
NO2_071	New Orleans	2012	195	195	184	188	128	130	147	159	188	188	119	121	115	153	166	170	157	168	191	191	104	113	166	175
NO2_072	New Orleans	2012	195	209	184	184	128	130	159	159	184	188	117	121	115	153	170	178	158	168	188	191	104	113	175	175
NO2_073	New Orleans	2012	195	195	184	188	128	130	147	159	188	188	119	121	115	153	166	170	157	168	191	191	104	113	166	175
NO2_074	New Orleans	2012	195	209	184	184	128	130	159	159	184	188	117	121	115	133	166	178	158	168	188	191	107	113	175	175
NO2_075	New Orleans	2012	195	195	184	188	130	130	147	159	188	188	119	121	115	153	170	178	157	168	191	191	113	113	166	175
NO2_076	New Orleans	2012	195	197	184	186	128	130	159	159	188	188	121	121	133	153	166	178	168	168	188	191	104	113	175	175
NO2_077	New Orleans	2012	195	197	184	188	128	130	159	159	184	184	115	117	131	161	172	178	168	168	188	188	113	113	166	175
NO2_078	New Orleans	2012	197	197	184	186	128	128	158	159	184	184	115	115	115	131	178	178	168	168	182	188	113	113	175	175
NO2_079	New Orleans	2012	195	197	186	188	130	130	159	159	184	184	115	117	131	161	172	178	158	168	182	188	113	113	166	166
NO2_080	New Orleans	2012	197	197	184	186	128	128	158	159	184	184	115	115	131	161	172	178	168	168	182	191	113	113	175	175
NO2_081	New Orleans	2012	195	197	186	188	130	130	147	158	184	188	115	117	115	131	172	178	158	168	182	191	113	113	166	166
NO2_082	New Orleans	2012	195	197	184	186	128	130	158	159	184	184	115	115	131	161	178	178	168	168	182	188	113	113	166	175
NO2_083	New Orleans	2012	195	197	188	188	128	130	147	159	184	188	117	117	115	129	172	178	168	168	188	188	113	113	166	175
NO2_084	New Orleans	2012	195	197	184	188	130	130	159	159	184	184	115	117	131	161	178	178	158	168	188	188	113	113	166	166
NO2_085	New Orleans	2012	195	197	186	188	128	130	147	158	184	188	115	117	115	131	178	178	168	168	182	188	113	113	166	175
NO2_086	New Orleans	2012	197	197	188	188	128	130	158	158	184	184	115	117	119	143	170	176	159	171	188	188	113	113	175	175
NO2_087	New Orleans	2012	197	209	186	188	130	130	158	159	184	184	117	119	119	139	168	172	158	171	191	191	113	113	166	166
NO2_088	New Orleans	2012	197	209	186	188	128	130	159	159	184	184	117	119	119	139	172	176	171	171	188	188	113	113	166	166
NO2_089	New Orleans	2012	197	197	188	188	128	130	158	159	184	184	115	117	119	139	170	176	171	171	191	191	113	113	166	166
NO2_090	New Orleans	2012	197	209	186	188	130	130	158	159	184	184	115	119	119	139	172	176	158	171	191	191	113	113	166	166
NO2_091	New Orleans	2012	197	197	188	188	128	130	158	158	184	184	115	115	115	139	168	172	159	171	191	191	113	113	175	175
NO2_092	New Orleans	2012	197	197	188	188	128	130	158	158	184	184	115	117	119	139	170	176	171	171	191	191	113	113	166	166
NO2_093	New Orleans	2012	197	209	186	188	128	130	159	159	184	184	117	119	119	139	172	176	159	171	188	188	113	113	175	175
NO2_094	New Orleans	2012	195	197	186	188	128	130	158	159	184	188	115	117	115	161	172	178	168	168	188	191	113	113	-9	-9
NO2_095	New Orleans	2012	197	209	186	188	128	130	158	159	184	184	115	119	139	143	170	172	158	171	188	191	113	113	166	166
NO2_096	New Orleans	2012	195	197	188	188	128	130	158	159	184	188	115	119	115	115	178	178	168	168	188	191	113	113	175	175
NO2_097	New Orleans	2012	195	197	188	188	128	130	158	159	184	188	119	121	115	115	170	178	158	168	188	191	113	113	175	175
NO2_098	New Orleans	2012	195	197	188	188	128	130	157	158	184	184	115	119	115	115	170	178	168	168	188	191	95	113	175	175
NO2_099	New Orleans	2012	195	197	188	188	128	130	157	158	184	184	119	121	115	115	170	172	168	168	188	191	113	113	175	175
NO2_100	New Orleans	2012	197	209	186	188	128	130	157	158	184	184	121	121	115	115	172	178	158	168	188	188	113	113	166	175
NO2_101	New Orleans	2012	195	197	188	188	128	130	158	159	184	188	119	121	115	115	170	178	168	168	191	191	113	113	166	175
NO2_102	New Orleans	2012	195	197	188	188	128	130	157	158	184	184	119	121	115	115	170	178	158	168	188	191	113	113	166	175
NO2_103	New Orleans	2012	197	209	188	188	128	130	157	158	184	184	115	119	115	115	178	178	158	168	188	188	95	113	166	175
NO2_104	New Orleans	2012	195	197	188	188	128	130	158	159	184	188	115	119	115	115	170	178	168	168	188	191	113	113	175	175
NO2_105	New Orleans	2012	197	209	186	188	128	130	157	158	184	188	115	121	115	115	170	178	158	168	188	188	95	113	166	175
NO2_106	New Orleans	2012	195	197	186	188	128	130	157	158	184	184	115	121	115	115	172	178	168	168	188	191	95	113	166	175
NO2_107	New Orleans	2012	197	209	186	188	128	130	158	159	184	188	115	121	115	115	178	178	158	168	191	191	113	113	175	175
NO2_108	New Orleans	2012	197	209	188	188	128	130	158	159	184	188	119	121	115	115	170	178	158	168	191	191	113	113	166	175
NO2_109	New Orleans	2012	197	209	188	188	128	130	158	159	184	188	119	121	115	115	170	172	158	168	191	191	113	113	175	175
NO2_110	New Orleans	2012	195	197	188	188	128	130	158	159	184	188	115	119	115	115	170	178	168	168	188	191	113	113	175	175
NO2_111	New Orleans	2012	195	197	188	188	128	130	157	158	184	184	115	119	115	115	178	178	168	168	188	191	95	113	175	175
NO2_112	New Orleans	2012	195	197	186	188	128	130	157	158	184	184	115	121	115	115	172	178	168	168	191	191	113	113	166	175
NO2_113	New Orleans	2012	197	209	188	188	128	130	157	158	184	184	115	119	115	115	170	172	168	168	188	188	113	113	175	175
NO2_114	New Orleans	2012	197	209	188	188	128	130	157	158	184	184	115	119	115	115	178	178	158	168	188	188	113	113	175	175
NO2_115	New Orleans	2012	195	209	188	188	130	130	157	159	184	188	115	121	115	115	170	178	158	168	191	191	95	113	175	175
NO2_116	New Orleans	2012	195	197	188	188	130	130	156	159	184	188	117	121	115	115	166	178	168	171	191	191	113	113	172	175
NO2_117	New Orleans	2012	195	209	188	188	128	130	157	159	188	188	117	121	129	133	172	178	158	159	182	188	113	113	166	175
NO2_118	New Orleans	2012	195	195	188	188	130	130	156	157	184	188	117	121	115	133	170	178	168	171	188	191	113	113	172	175
NO2_119	New Orleans	2012	195	209	188	188	130	130	156	157	184	188	119	121	115	129	178	178	159	168	188	188	113	113	166	166
NO2_120	New Orleans	2012	195	209	188	188	130	130	159	160	188	188	119	121	129	133	170	172	158	159	182	188	113	113	166	175
NO2_121	New Orleans	2012	195	195	188	188	128	130	157	160	184	188	117	121	129	133	170	178	159	168	-9	-9	113	113	-9	-9
NO2_122	New Orleans	2012	195	197	188	188	130	130	157	159	184	188	119	121	115	129	166	178	168	171	188	191	113	113	172	175
NO2_123	New Orleans	2012	195	197	188	188	130	130	156	157	184	188	119	121	129	133	170	178	168	171	188	191	113	113	172	175
NO2_124	New Orleans	2012	195	197	188	188	130	130	156	157	184	188	117	121	115	115	178	178	168	171	191	191	113	113	172	175
NO2_125	New Orleans	2012	195	209	188	188	128	130	159	160	188	188	119	121	129	133	170	172	158	159	188	188	113	113	166	175
NO2_126	New Orleans	2012	195	197	188	188	130	130	156	159	184	188	119	121	115	115	166	178	168	171	191	191	113	113	172	175
NO2_127	New Orleans	2012	195	195	188	188	130	130	156	157	184	188	119	121	115	115	178	178	159	168	188	191	113	113	166	172
NO2_128	New Orleans	2012	197	209	188	188	130	130	157	160	188	188	119	121	115	115	172	178	156	171	182	191	113	113	175	175
NO2_129	New Orleans	2012	195	197	188	188	130	130	156	157	184	188	117	121	115	115	166	170	168	171	191	191	113	113	172	175
NO2_130	New Orleans	2012	195	195	188	188	130	130	156	159	184	188	119	121	115	129	178	178	159	168	191	191	113	113	166	172
NO2_131	New Orleans	2012	197	209	188	188	128	130	159	160	188	188	117	121	115	133	172	178	158	171	182	191	113	113	175	175
NO2_132	New Orleans	2012	195	195	188	188	130	130	156	159	184	188	117	121	115	129	178	178	159	168	188	191	113	113	166	172
NO2_133	New Orleans	2012	197	209	188	188	130	130	157	159	188	188	119	121	115	133	170	172	156	171	182	191	113	113	175	175
NO2_134	New Orleans	2012	195	209	188	188	130	130	156	159	184	188	117	121	115	129	178	178	159	168	188	188	113	113	166	166
NO2_135	New Orleans	2012	-9	-9	188	188	130	130	-9	-9	188	188	121	121	115	129	170	178	159	171	188	191	113	113	166	175
NO2_136	New Orleans	2012	197	197	188	188	128	130	156	158	184	184	115	121	115	129	172	176	158	158	191	194	113	113	166	175
NO2_137	New Orleans	2012	197	197	188	188	128	130	156	158	184	184	115	115	115	115	172	176	158	171	182	182	113	113	175	175
NO2_138	New Orleans	2012	197	197	188	188	128	130	156	158	184	184	115	115	115	115	172	176	158	158	182	194	113	113	166	175
NO2_139	New Orleans	2012	197	197	188	188	128	130	157	158	184	184	115	121	115	129	172	176	158	158	191	194	113	113	166	175
NO2_140	New Orleans	2012	197	197	188	188	128	130	156	158	184	184	115	121	115	129	172	176	158	171	182	182	113	113	175	175
NO2_141	New Orleans	2012	197	197	188	188	128	130	157	158	184	184	115	121	115	129	172	176	158	158	191	194	113	113	166	175
NO2_142	New Orleans	2012	197	197	188	188	128	130	157	158	184	184	115	115	115	129	172	176	158	171	191	194	113	113	175	175
NO2_143	New Orleans	2012	197	197	188	188	128	130	147	157	184	184	119	121	115	129	172	176	158	158	191	191	113	113	166	175
NO2_144	New Orleans	2012	197	197	188	188	128	130	147	157	184	188	119	121	115	115	172	176	158	171	182	182	113	113	175	175
NO2_145	New Orleans	2012	197	197	188	188	128	130	156	158	184	184	119	121	115	115	172	176	158	171	182	182	113	113	175	175
NO2_146	New Orleans	2012	197	197	188	188	128	130	156	158	184	184	115	121	115	115	172	176	158	171	182	182	113	113	175	175
NO2_147	New Orleans	2012	197	197	188	188	128	130	157	158	184	184	115	115	115	115	172	176	158	158	191	194	113	113	166	175
NO2_148	New Orleans	2012	197	197	188	188	128	130	147	157	184	184	119	121	115	129	172	176	158	171	182	182	113	113	175	175
NO2_149	New Orleans	2012	197	197	188	188	128	130	157	158	184	188	115	121	115	115	172	176	158	158	182	194	113	113	166	175
NO2_150	New Orleans	2012	197	197	188	188	128	128	156	157	184	184	115	121	115	115	172	172	158	158	182	191	113	113	175	175
18_001	Musco (1)	2011	201	209	188	188	130	130	160	162	184	188	115	115	115	133	168	170	162	168	182	191	113	113	166	175
18_002	Musco (1)	2011	201	201	184	184	128	130	157	159	184	184	117	119	115	117	168	172	162	168	191	191	113	113	166	166
18_003	Musco (1)	2011	195	209	184	188	128	128	160	161	184	188	115	117	115	133	176	178	158	171	191	191	113	113	166	175
18_004	Musco (1)	2011	203	209	184	184	128	128	147	157	184	188	115	121	115	117	168	172	171	171	182	182	113	113	175	175
18_005	Musco (1)	2011	195	203	184	184	128	128	156	157	188	188	115	119	129	133	168	176	171	171	188	188	113	113	172	175
18_006	Musco (1)	2011	197	209	186	188	128	130	147	159	184	188	115	115	115	131	170	172	158	158	188	191	113	113	166	166
18_007	Musco (1)	2011	197	209	184	186	128	130	159	159	188	188	117	117	115	115	170	178	158	171	191	191	95	113	166	175
18_008	Musco (1)	2011	201	209	186	188	130	130	157	161	184	188	115	121	115	149	172	176	158	171	191	191	113	113	166	175
18_009	Musco (1)	2011	197	203	186	188	128	128	156	157	188	188	115	115	115	133	170	172	158	158	182	191	113	113	148	166
18_010	Musco (1)	2011	195	209	186	188	128	130	157	159	188	188	115	117	115	115	172	174	158	168	182	188	113	113	166	175
18_011	Musco (1)	2011	195	197	184	184	128	128	145	147	188	188	115	115	117	133	168	172	168	171	191	191	95	113	166	175
18_012	Musco (1)	2011	209	209	186	186	128	130	159	161	184	188	115	119	115	133	168	178	158	159	188	191	113	113	172	175
9_001	Musco (1)	2011	195	209	188	188	128	128	147	157	184	188	115	117	115	117	168	168	162	168	191	191	113	113	175	175
9_002	Musco (1)	2011	195	199	184	188	128	128	147	161	184	188	115	115	115	115	168	170	162	171	191	191	95	113	166	166
9_003	Musco (1)	2011	197	209	186	186	128	130	147	159	188	188	115	117	117	133	172	178	158	168	191	191	113	113	166	175
9_004	Musco (1)	2011	197	209	184	188	128	128	158	160	188	188	115	115	117	143	172	172	158	171	188	191	95	113	172	175
9_005	Musco (1)	2011	197	209	188	188	128	130	157	159	184	184	115	115	115	145	170	174	159	171	191	191	113	113	166	172
9_006	Musco (1)	2011	195	197	184	188	128	130	158	158	184	188	115	115	115	143	168	168	162	171	191	191	113	113	166	175
9_007	Musco (1)	2011	195	201	184	188	130	130	156	158	184	188	117	119	131	143	168	170	158	171	188	191	113	113	166	175
9_008	Musco (1)	2011	197	209	184	184	128	130	159	161	188	188	117	119	115	133	172	172	158	168	188	188	95	113	166	166
9_009	Musco (1)	2011	209	209	188	188	128	130	157	161	184	188	119	119	133	133	176	178	162	162	182	191	113	113	175	175
9_010	Musco (1)	2011	201	209	184	184	128	128	157	159	184	188	117	119	115	133	168	174	171	171	188	191	95	95	166	172
9_011	Musco (1)	2011	195	201	186	186	128	130	157	161	188	188	115	117	115	133	172	178	162	162	182	182	113	113	166	175
9_012	Musco (1)	2011	195	197	184	186	130	130	147	157	188	188	115	115	115	129	170	172	158	171	188	188	113	113	175	175
9_013	Musco (1)	2011	203	209	186	188	128	130	156	157	188	188	115	115	117	135	168	176	168	171	191	191	107	107	166	175
9_014	Musco (1)	2011	197	203	184	184	128	130	145	158	184	184	115	117	133	145	172	178	158	158	191	191	113	113	172	175
9_015	Musco (1)	2011	201	203	184	188	128	128	147	159	184	184	115	117	115	145	170	174	159	171	191	191	95	113	166	172
9_017	Musco (1)	2011	197	203	184	188	130	130	159	161	184	188	115	115	115	145	168	178	168	171	191	191	113	113	166	175
9_018	Musco (1)	2011	199	209	184	188	130	130	159	161	188	188	115	119	115	115	168	170	158	158	188	191	113	113	166	175
9_019	Musco (1)	2011	197	209	184	184	128	128	147	159	184	188	117	117	115	145	168	178	158	159	191	191	113	113	166	175
9_020	Musco (1)	2011	195	197	184	186	130	130	147	157	184	184	117	117	133	145	170	170	158	171	182	194	95	113	166	175
9_021	Musco (1)	2011	195	201	184	188	130	130	159	159	184	188	115	121	115	115	172	172	162	168	188	191	113	113	166	175
9_022	Musco (1)	2011	195	209	184	188	128	130	158	159	188	188	115	117	115	115	178	178	168	168	188	191	113	113	172	175
9_023	Musco (1)	2011	197	201	188	188	128	130	147	158	184	188	115	117	115	115	170	170	158	162	188	191	113	113	175	175
9_024	Musco (1)	2011	197	209	184	188	128	130	157	159	184	184	117	121	133	161	168	170	171	171	188	191	113	113	172	175
9_025	Musco (1)	2011	195	203	186	186	128	128	156	161	188	188	117	121	115	115	168	172	162	171	182	191	113	113	166	175
9_026	Musco (1)	2011	195	203	186	186	128	130	149	158	188	188	115	117	115	117	172	174	158	171	191	191	113	113	175	175
9_027	Musco (1)	2011	197	203	186	188	128	130	157	157	184	184	117	119	115	143	168	178	158	171	182	188	113	113	172	175
9_028	Musco (1)	2011	197	201	186	188	128	130	159	159	184	188	115	115	115	133	172	178	171	171	191	191	113	113	172	175
9_029	Musco (1)	2011	201	201	184	188	128	130	156	157	184	188	117	121	133	133	168	172	171	171	182	182	107	113	148	166
9_030	Musco (1)	2011	195	197	186	188	128	130	147	158	184	188	115	115	115	115	172	178	168	171	191	191	113	113	172	175
9_031	Musco (1)	2011	195	197	184	188	128	130	158	158	184	184	115	119	133	143	168	172	158	171	188	191	113	113	175	175
9_032	Musco (1)	2011	197	199	188	188	130	130	149	157	184	184	117	121	115	159	170	178	159	171	182	191	113	113	166	175
9_033	Musco (1)	2011	197	197	184	188	128	130	157	161	184	188	117	121	115	129	170	170	158	162	182	191	113	113	166	175
9_034	Musco (1)	2011	197	201	186	188	130	130	154	158	184	188	115	115	115	133	172	178	158	162	188	191	95	113	166	175
9_035	Musco (1)	2011	203	209	184	186	128	130	159	161	184	184	115	119	115	117	168	172	158	168	188	191	113	113	166	175
9_036	Musco (1)	2011	195	201	186	186	128	130	159	161	188	188	115	115	129	149	168	172	168	171	182	191	113	113	166	175
9_037	Musco (1)	2011	201	203	186	188	128	130	158	161	184	188	115	115	115	143	170	178	171	171	188	191	113	113	166	175
GA_001	Musco (2)	2012	201	203	184	186	128	128	156	157	184	188	115	119	115	115	168	178	162	162	188	191	113	113	175	175
GA_002	Musco (2)	2012	201	203	184	188	128	130	157	159	184	188	115	121	115	115	178	178	162	162	182	188	113	113	166	166
GA_003	Musco (2)	2012	195	201	186	186	128	130	157	161	184	184	115	117	115	143	168	172	162	171	188	188	113	113	166	175
GA_004	Musco (2)	2012	197	209	184	186	128	130	157	158	184	184	115	121	115	131	168	176	171	171	188	191	95	113	172	175
GA_005	Musco (2)	2012	195	203	184	188	128	130	157	159	184	188	115	121	115	115	178	178	162	171	188	188	113	113	166	166
GA_006	Musco (2)	2012	197	209	184	186	128	130	149	154	188	188	115	121	115	131	168	172	171	171	188	191	95	113	172	175
GA_007	Musco (2)	2012	197	203	184	184	128	128	157	158	184	188	119	121	115	145	168	168	158	162	182	188	113	113	166	175
FLO_001	Rio	2014	201	209	188	188	128	128	159	160	184	184	117	117	131	141	168	168	168	171	188	191	95	113	172	172
FLO_002	Rio	2014	197	197	188	188	128	130	147	159	184	184	117	121	117	141	172	176	158	168	-9	-9	95	113	148	172
FLO_003	Rio	2014	197	209	186	188	128	128	156	159	184	184	117	119	119	141	168	176	158	168	191	191	113	113	172	172
FLO_004	Rio	2014	201	209	188	188	128	130	147	157	188	188	121	121	115	115	174	176	158	168	191	191	95	113	175	175
FLO_005	Rio	2014	195	197	188	188	128	130	158	159	184	184	115	117	115	115	172	176	158	158	191	191	113	113	172	172
FLO_006	Rio	2014	201	201	184	188	128	128	147	161	184	188	117	121	115	117	176	178	168	171	191	191	113	113	166	172
FLO_007	Rio	2014	197	197	184	188	128	128	155	161	184	184	115	117	115	141	172	178	158	171	188	191	95	113	166	175
FLO_008	Rio	2014	197	197	188	188	128	128	147	159	188	188	119	121	117	139	168	176	156	171	188	191	95	113	172	172
FLO_009	Rio	2014	197	209	188	188	128	130	158	158	184	184	117	119	115	135	172	174	168	171	191	194	113	113	148	175
FLO_010	Rio	2014	197	209	184	188	128	128	157	158	184	188	117	117	115	141	172	172	168	171	191	191	113	113	172	172
FLO_011	Rio	2014	201	209	188	188	128	130	156	159	184	184	117	121	115	115	172	172	158	171	188	188	113	113	172	172
FLO_012	Rio	2014	195	209	188	188	128	128	159	160	184	188	115	119	115	153	178	178	158	158	188	188	113	113	172	172
FLO_014	Rio	2014	209	209	184	188	128	130	152	159	184	188	117	119	115	115	168	172	168	171	182	194	113	113	166	166
FLO_015	Rio	2014	195	209	184	188	130	130	159	164	188	188	115	119	115	115	170	178	158	158	182	182	113	113	172	175
FLO_016	Rio	2014	195	197	184	188	128	130	156	157	184	184	117	117	115	115	172	178	156	168	188	188	95	113	166	175
FLO_017	Rio	2014	197	197	184	188	128	130	152	156	184	184	117	121	115	115	178	178	156	168	182	188	113	113	166	175
FLO_018	Rio	2014	209	209	184	188	130	130	147	159	184	188	117	117	139	141	176	178	168	168	188	188	113	113	166	175
FLO_019	Rio	2014	197	209	188	188	128	130	147	161	184	184	115	117	117	135	166	172	159	168	188	188	113	113	166	175
FLO_020	Rio	2014	197	209	184	188	128	130	156	158	184	188	117	121	115	117	168	168	168	171	188	188	113	113	172	175
FLO_021	Rio	2014	195	197	184	184	128	130	147	161	184	184	117	117	117	117	172	178	158	168	188	191	113	113	172	172
FLO_022	Rio	2014	197	209	188	188	130	130	147	159	188	188	117	119	115	117	170	178	158	168	188	188	113	113	166	175
FLO_023	Rio	2014	209	209	186	188	130	130	147	157	184	188	119	119	117	117	170	178	168	168	182	182	95	113	166	175
FLO_024	Rio	2014	197	209	188	188	128	130	160	161	184	188	115	117	115	117	170	176	158	171	191	191	95	113	166	175
FLO_025	Rio	2014	195	209	184	188	128	130	159	160	184	184	117	117	115	131	172	172	168	168	191	191	113	113	148	175
FLO_026	Rio	2014	197	201	184	188	128	130	147	159	188	188	117	117	115	115	176	176	158	162	188	191	95	113	172	175
FLO_028	Rio	2014	197	197	184	188	128	130	147	147	184	184	115	121	115	117	168	172	168	171	188	188	113	113	172	175
FLO_029	Rio	2014	209	209	188	188	128	130	156	159	184	188	117	121	119	135	170	172	158	168	191	191	113	113	166	166
FLO_030	Rio	2014	209	209	184	188	128	128	158	159	184	184	117	119	115	145	168	172	156	158	188	191	95	113	166	166
FLO_031	Rio	2014	195	209	184	188	128	130	147	161	184	188	117	117	115	115	168	172	156	168	188	188	113	113	166	172
FLO_032	Rio	2014	197	197	186	188	130	130	147	147	188	188	115	121	117	117	166	176	158	171	188	191	95	95	166	166
FLO_033	Rio	2014	197	197	184	188	128	128	158	159	184	188	117	117	115	115	170	176	168	171	188	191	113	113	166	172
FLO_034	Rio	2014	195	209	182	184	128	130	156	158	184	184	117	121	139	143	172	178	168	171	188	191	113	113	166	175
FLO_035	Rio	2014	197	209	188	188	128	130	157	161	184	188	117	121	115	115	172	172	158	171	188	191	113	113	172	172
FLO_036	Rio	2014	195	209	188	188	130	130	154	156	188	188	115	117	117	139	172	176	158	171	182	182	113	113	166	172
FLO_037	Rio	2014	197	209	184	188	128	128	157	159	184	188	115	115	117	149	170	172	158	171	182	191	113	113	148	172
FLO_038	Rio	2014	197	197	186	188	130	130	147	161	184	188	115	117	115	115	174	176	158	159	182	188	95	113	166	172
FLO_039	Rio	2014	197	197	188	188	128	128	147	152	184	184	117	117	117	141	168	174	159	168	188	191	95	113	172	172
FLO_040	Rio	2014	195	209	184	188	128	130	158	159	184	184	115	121	115	115	168	172	158	168	191	194	95	113	172	172
FLO_041	Rio	2014	197	209	186	188	130	130	159	161	184	188	115	117	115	115	172	178	158	159	182	188	95	113	166	175
FLO_042	Rio	2014	197	197	188	188	130	130	157	159	184	184	117	121	115	115	178	178	168	171	182	188	113	113	166	172
FLO_044	Rio	2014	195	209	184	188	128	130	156	159	184	188	117	119	117	117	168	178	158	168	188	188	95	95	166	166
FLO_045	Rio	2014	195	197	188	188	128	130	147	157	184	188	115	117	119	131	172	172	158	158	182	191	113	113	166	166
FLO_046	Rio	2014	197	209	186	188	130	130	158	159	184	188	117	121	117	141	172	176	156	171	182	182	113	113	166	172
FLO_047	Rio	2014	201	209	188	188	128	128	159	160	184	188	117	119	115	115	176	176	158	158	188	191	113	113	172	172
FLO_048	Rio	2014	197	209	188	188	128	128	156	161	184	184	115	121	115	115	172	176	171	171	191	191	95	113	172	172
FLO_049	Rio	2014	197	197	188	188	128	128	157	159	184	188	115	117	117	117	166	168	168	168	188	191	95	113	148	166
FLO_050	Rio	2014	197	209	188	188	130	130	159	161	184	188	115	121	115	143	172	178	168	171	188	191	95	113	148	172
FLO_051	Rio	2014	195	209	182	188	128	130	157	159	188	188	117	119	119	135	168	172	158	158	182	182	113	113	166	175
FLO_052	Rio	2014	195	201	188	188	128	128	152	159	184	184	117	119	117	119	168	172	168	171	188	191	95	113	166	172
FLO_071	Rio	2014	195	209	184	188	130	130	147	160	184	188	115	117	117	117	172	172	158	168	188	191	95	113	172	175
FLO_072	Rio	2014	195	197	186	188	128	128	157	164	184	184	115	121	115	117	172	172	158	158	182	188	113	113	166	166
Vaca_001	Vaca Key	2009	209	209	188	188	130	130	156	161	184	188	117	119	119	141	172	178	158	168	182	191	113	113	172	172
Vaca_002	Vaca Key	2009	209	209	188	188	130	130	159	161	184	184	119	119	119	141	172	178	168	171	182	191	113	113	172	172
Vaca_003	Vaca Key	2009	195	209	188	188	128	130	148	156	184	184	117	121	135	141	176	178	158	171	182	191	113	113	172	172
Vaca_004	Vaca Key	2009	209	209	188	188	130	130	156	156	184	184	121	121	115	135	168	176	158	171	188	191	95	113	172	172
Vaca_005	Vaca Key	2009	195	209	188	188	128	130	148	156	184	184	117	121	141	151	176	178	158	171	182	191	113	113	172	172
Vaca_006	Vaca Key	2009	195	209	188	188	128	128	156	156	184	184	121	121	135	141	176	178	168	171	188	188	113	113	166	166
Vaca_007	Vaca Key	2009	195	209	188	188	128	128	147	148	184	188	117	117	141	151	168	176	168	171	191	191	113	113	166	172
Vaca_008	Vaca Key	2009	209	209	188	188	130	130	147	148	184	188	117	117	115	151	176	178	158	171	182	188	95	113	172	172
Vaca_009	Vaca Key	2009	197	209	184	188	130	130	152	157	188	188	117	121	119	141	166	168	168	171	191	191	113	113	172	172
Vaca_010	Vaca Key	2009	209	209	184	184	130	130	160	160	184	184	117	117	141	141	166	168	156	162	188	188	113	113	166	166
Vaca_011	Vaca Key	2009	197	209	186	188	128	130	156	156	184	188	115	121	115	115	170	178	168	168	182	191	113	113	166	172
Vaca_012	Vaca Key	2009	197	209	188	188	128	128	158	160	184	184	117	121	141	141	172	176	158	168	182	182	113	113	172	172
Vaca_013	Vaca Key	2009	195	195	188	188	128	128	154	161	188	188	121	121	115	141	166	168	158	168	182	182	113	113	166	172
Vaca_014	Vaca Key	2009	195	209	184	188	128	130	158	158	184	184	117	119	141	153	168	178	158	171	182	188	113	113	166	166
Vaca_015	Vaca Key	2009	195	209	184	188	130	130	157	158	184	184	119	121	115	141	168	168	158	171	182	188	95	113	166	166
Vaca_016	Vaca Key	2009	195	209	184	188	128	128	158	159	184	188	121	121	141	153	168	178	158	168	182	188	113	113	166	172
Vaca_017	Vaca Key	2009	195	209	184	188	130	130	157	159	184	188	119	121	141	153	168	168	158	171	182	188	95	113	166	166
Vaca_018	Vaca Key	2009	195	197	184	188	128	128	158	158	184	184	117	119	115	119	178	178	158	168	182	191	95	113	166	172
Vaca_019	Vaca Key	2009	209	209	188	188	130	130	147	154	188	188	117	117	119	151	172	178	168	168	182	191	95	113	172	172
Vaca_020	Vaca Key	2009	195	195	184	188	128	130	147	159	184	188	115	117	115	139	178	178	171	171	182	182	113	113	166	172
Vaca_021	Vaca Key	2009	209	209	184	184	130	130	159	159	184	184	119	121	115	119	166	178	159	159	188	188	113	113	172	175
Vaca_022	Vaca Key	2009	209	209	188	188	130	130	156	169	184	184	117	121	117	117	174	178	159	159	182	188	113	113	172	175
Vaca_023	Vaca Key	2009	195	209	188	188	128	128	156	159	184	184	115	115	115	115	166	172	149	156	182	182	95	113	160	160
Vaca_024	Vaca Key	2009	195	209	184	188	128	128	147	156	184	184	117	121	115	139	166	178	158	168	182	182	113	113	172	172
Vaca_025	Vaca Key	2009	209	209	184	188	130	130	147	161	184	184	121	121	115	119	176	176	158	171	182	194	113	113	172	175
Vaca_026	Vaca Key	2009	209	209	188	188	128	128	147	161	184	184	121	121	117	119	176	176	171	171	182	194	113	113	166	172
Vaca_027	Vaca Key	2009	195	209	184	188	128	130	148	161	184	184	117	121	117	141	176	178	158	171	191	194	113	113	166	166
Vaca_028	Vaca Key	2009	209	209	188	188	128	128	147	157	184	184	115	115	115	115	172	172	168	171	182	182	95	113	172	172
Vaca_029	Vaca Key	2009	209	209	188	188	128	128	147	157	184	184	115	121	115	115	166	178	168	171	182	182	113	113	172	172
Vaca_030	Vaca Key	2009	209	209	184	188	130	130	157	159	184	184	115	117	115	115	166	172	168	171	182	182	113	113	172	175
Vaca_031	Vaca Key	2009	195	209	184	188	128	128	157	159	184	184	117	121	115	115	172	172	158	158	182	182	95	113	172	175
Vaca_032	Vaca Key	2009	197	209	188	188	130	130	148	158	184	184	121	121	117	119	176	176	158	171	188	194	113	113	175	175
Vaca_033	Vaca Key	2009	195	209	188	188	128	128	154	169	184	188	117	119	115	117	176	178	158	159	182	191	113	113	166	172
Vaca_034	Vaca Key	2009	209	209	184	188	130	130	156	159	184	184	115	117	115	115	172	172	158	171	182	182	95	113	172	175
Vaca_035	Vaca Key	2009	195	209	188	188	130	130	147	148	188	188	115	117	115	119	168	178	158	168	182	182	113	113	166	166
Vaca_036	Vaca Key	2009	209	209	188	188	128	128	160	160	184	184	115	121	115	117	172	178	156	171	182	182	113	113	166	172
Vaca_037	Vaca Key	2009	195	209	188	188	130	130	148	158	184	188	115	121	115	119	168	172	158	158	182	182	113	113	166	166
Vaca_038	Vaca Key	2009	209	209	188	188	130	130	157	159	184	184	115	115	115	139	166	178	158	171	182	182	95	113	172	175
Vaca_039	Vaca Key	2009	197	197	184	184	130	130	147	156	184	184	117	119	115	117	168	178	159	159	182	182	113	113	166	172
Vaca_040	Vaca Key	2009	209	209	188	188	128	128	157	159	184	184	115	115	115	115	166	172	168	171	182	182	113	113	172	172
Vaca_041	Vaca Key	2009	195	209	184	184	128	130	147	161	184	188	117	119	115	115	168	178	159	159	182	182	113	113	166	172
Vaca_042	Vaca Key	2009	197	209	184	188	128	128	156	156	184	188	117	119	115	117	176	176	159	168	182	191	95	113	172	175
Conch_001	Conch Key	2006	209	209	184	188	128	128	156	161	188	188	121	121	117	137	168	172	162	168	191	191	95	113	166	172
Conch_002	Conch Key	2006	209	209	184	188	130	130	147	148	184	184	115	121	115	117	168	176	168	171	182	182	113	113	172	175
Conch_003	Conch Key	2006	195	197	184	188	130	130	148	156	184	184	117	117	115	143	178	178	159	168	188	191	95	113	166	172
Conch_004	Conch Key	2006	197	209	184	188	128	128	147	157	184	184	117	121	115	119	170	178	159	171	182	188	113	113	166	172
Conch_005	Conch Key	2006	197	209	184	184	128	130	148	156	184	188	119	121	117	117	178	178	168	171	182	191	113	113	166	172
Conch_006	Conch Key	2006	197	197	184	184	128	130	148	159	184	188	115	121	115	117	168	178	158	168	188	194	113	113	166	175
Conch_007	Conch Key	2006	197	209	188	188	128	128	158	158	184	188	121	125	115	119	172	174	158	162	182	191	113	113	166	172
Conch_008	Conch Key	2006	197	209	188	188	128	130	148	152	184	184	121	125	119	133	168	168	158	171	182	182	113	113	166	172
Conch_009	Conch Key	2006	195	197	188	188	130	130	148	152	184	184	121	125	119	133	168	168	159	168	191	191	113	113	166	166
Conch_010	Conch Key	2006	197	209	188	188	130	130	158	158	188	188	115	119	115	119	170	178	159	171	182	188	95	113	166	166
Conch_011	Conch Key	2006	197	209	184	188	128	130	148	159	184	188	117	121	115	133	168	172	158	158	182	188	113	113	166	175
Conch_012	Conch Key	2006	197	209	184	188	128	128	148	148	184	184	121	121	115	123	168	178	158	168	182	188	113	113	166	166
Conch_013	Conch Key	2006	209	209	184	188	128	128	154	161	184	188	121	121	115	135	170	170	159	159	182	191	113	113	166	166
Conch_014	Conch Key	2006	195	201	188	188	128	130	148	156	184	188	115	119	119	145	170	176	158	159	182	188	113	113	166	172
Conch_015	Conch Key	2006	209	209	188	188	128	130	148	156	188	188	115	121	117	119	178	178	158	168	182	188	107	113	166	166
Conch_016	Conch Key	2006	195	197	184	188	128	130	148	154	184	184	117	119	115	143	178	178	158	159	191	191	95	113	172	172
Conch_017	Conch Key	2006	197	197	184	188	128	128	148	148	184	184	117	121	115	133	168	178	168	168	182	188	113	113	166	166
Conch_018	Conch Key	2006	209	209	188	188	128	128	148	154	184	188	115	119	115	119	170	178	159	168	182	191	113	113	166	166
Conch_019	Conch Key	2006	209	209	188	188	128	128	157	161	184	188	115	121	119	119	178	178	168	168	182	191	113	113	166	175
Conch_020	Conch Key	2006	209	209	184	188	128	128	148	154	184	188	119	121	119	135	170	170	159	159	182	182	113	113	166	166
Conch_021	Conch Key	2006	197	209	184	184	128	130	148	159	184	188	115	117	117	133	178	178	158	158	188	194	113	113	166	175
Conch_022	Conch Key	2006	197	209	188	188	130	130	148	158	184	188	115	117	115	119	170	178	159	171	182	188	95	113	166	166
Conch_023	Conch Key	2006	209	209	184	188	128	128	148	148	184	184	115	121	115	117	178	178	158	159	182	188	95	113	172	175
Conch_024	Conch Key	2006	197	197	184	188	128	130	148	148	184	184	121	121	115	117	178	178	158	168	182	188	113	113	166	175
Conch_025	Conch Key	2006	195	201	188	188	128	130	156	158	188	188	115	119	119	145	170	176	159	159	182	182	113	113	166	172
Conch_026	Conch Key	2006	195	197	188	188	128	128	147	156	184	188	119	121	115	141	168	170	171	171	188	188	95	113	172	175
Conch_027	Conch Key	2006	209	209	188	188	128	128	148	154	184	188	115	119	119	135	178	178	168	168	182	182	113	113	166	175
Conch_028	Conch Key	2006	209	209	184	188	128	128	157	161	184	188	121	121	119	119	170	178	159	168	182	182	113	113	166	175
Conch_029	Conch Key	2006	197	209	184	188	128	130	148	156	184	188	115	121	117	117	170	178	158	162	191	191	113	113	166	175
Conch_030	Conch Key	2006	209	209	184	188	128	130	148	158	184	188	119	121	115	145	170	178	158	162	182	191	95	113	166	175
Conch_031	Conch Key	2006	195	209	188	188	130	130	148	152	184	188	115	117	117	119	172	176	168	171	182	182	113	113	166	172
Conch_032	Conch Key	2006	197	209	188	188	130	130	148	148	184	184	115	121	115	117	178	178	158	159	188	188	95	113	166	166
Conch_033	Conch Key	2006	195	197	184	188	128	130	148	156	184	184	117	119	117	143	176	178	168	168	188	191	95	113	172	172
Conch_034	Conch Key	2006	197	209	184	188	128	128	148	148	188	188	121	123	115	115	178	178	159	159	188	188	95	113	172	172
Conch_035	Conch Key	2006	209	209	188	188	128	128	148	154	184	188	121	121	115	117	168	178	158	159	188	188	95	113	172	175
Conch_036	Conch Key	2006	197	209	186	188	128	128	156	158	188	188	115	115	115	117	168	176	168	171	182	188	113	113	172	172
Conch_037	Conch Key	2006	209	209	184	188	128	128	148	154	184	188	121	121	115	117	178	178	158	159	182	188	95	113	172	175
Conch_038	Conch Key	2006	209	209	188	188	128	128	148	154	184	188	115	121	115	135	170	170	159	168	182	191	113	113	166	166
Conch_039	Conch Key	2006	209	209	188	188	128	128	154	161	184	188	115	121	115	135	170	178	159	168	182	182	113	113	166	175
Conch_040	Conch Key	2006	209	209	184	188	128	128	147	148	184	188	117	117	115	117	174	178	159	171	182	191	107	113	166	166
Conch_041	Conch Key	2006	195	209	188	188	130	130	148	152	184	188	121	121	115	117	168	172	158	171	182	191	95	113	166	172
Conch_042	Conch Key	2006	197	197	184	188	128	130	148	148	184	184	121	121	115	115	172	178	158	158	188	194	113	113	166	175
Palm_001	Conch Key	2006	197	209	184	188	128	130	147	161	184	184	121	121	115	115	172	178	158	168	188	191	113	113	148	172
Palm_002	Palm Beach	2006	197	209	184	188	128	130	159	161	184	184	121	121	-9	-9	170	176	158	168	188	191	113	113	148	172
Palm_003	Palm Beach	2006	197	209	188	188	128	130	159	159	184	184	121	121	115	115	178	178	158	168	188	191	113	113	172	172
Palm_004	Palm Beach	2006	197	209	188	188	128	128	155	157	184	188	117	119	115	157	172	174	158	158	182	191	113	113	166	175
Palm_005	Palm Beach	2006	197	203	184	184	130	130	154	158	184	184	115	119	117	117	166	172	158	171	182	191	113	113	166	175
Palm_006	Palm Beach	2006	197	203	184	186	130	130	154	157	184	184	119	121	115	117	172	172	158	171	182	182	113	113	166	175
Palm_007	Palm Beach	2006	195	209	184	186	128	128	154	158	184	184	119	121	115	117	166	172	158	168	182	182	113	113	148	166
Palm_008	Palm Beach	2006	195	209	184	184	128	128	154	157	184	184	115	119	115	117	166	172	158	168	182	182	113	113	148	166
Palm_009	Palm Beach	2006	195	203	184	188	128	128	157	157	184	184	115	117	115	117	172	172	158	168	182	182	113	113	148	166
Palm_010	Palm Beach	2006	197	203	184	184	130	130	154	157	184	184	115	119	117	117	172	172	158	171	182	182	113	113	166	175
Palm_011	Palm Beach	2006	197	203	184	184	130	130	157	158	184	184	115	119	115	117	172	172	158	171	182	182	113	113	166	175
Palm_012	Palm Beach	2006	195	203	184	188	128	128	157	157	184	184	115	115	117	117	172	172	158	171	182	191	113	113	166	175
Palm_013	Palm Beach	2006	195	203	184	184	128	128	154	157	184	184	115	115	117	117	172	172	158	171	182	182	113	113	166	175
Palm_014	Palm Beach	2006	-9	-9	186	188	128	128	154	158	184	184	-9	-9	131	131	176	176	158	168	182	182	113	113	148	166
Palm_015	Palm Beach	2006	197	203	184	186	128	130	154	157	184	184	119	121	115	117	166	172	158	168	182	182	113	113	148	166
Palm_016	Palm Beach	2006	195	209	184	184	128	128	154	158	184	184	115	119	117	117	166	172	158	168	182	191	113	113	148	166
Palm_017	Palm Beach	2006	201	209	184	184	128	128	159	160	184	184	119	121	117	119	178	178	168	168	188	191	113	113	166	172
Palm_018	Palm Beach	2006	209	209	188	190	128	128	154	154	184	188	119	121	131	131	170	176	171	171	182	182	113	113	166	166
Palm_019	Palm Beach	2006	197	197	184	186	128	128	157	159	184	184	119	119	117	119	176	178	158	158	191	191	95	113	148	166
Palm_020	Palm Beach	2006	197	197	184	186	128	128	156	158	184	188	117	119	115	115	172	178	158	158	182	191	113	113	148	166
Palm_021	Palm Beach	2006	-9	-9	184	186	128	128	157	159	184	184	119	119	115	115	172	178	158	158	191	191	113	113	166	166
Palm_022	Palm Beach	2006	197	197	184	186	128	128	156	159	184	184	121	121	117	119	178	178	159	168	188	191	113	113	166	175
Palm_023	Palm Beach	2006	209	209	186	188	128	128	154	159	184	184	119	121	117	117	178	178	158	171	182	191	113	113	166	172
Palm_024	Palm Beach	2006	209	209	188	190	128	128	154	154	184	188	119	121	117	157	168	178	171	171	182	191	113	113	166	166
Palm_025	Palm Beach	2006	197	209	184	186	128	130	156	157	188	188	117	119	115	115	170	172	171	171	182	188	95	113	148	166
Palm_026	Palm Beach	2006	195	203	186	188	128	130	147	157	184	184	117	119	117	141	176	176	158	158	182	191	113	113	166	166
Palm_027	Palm Beach	2006	195	197	186	188	130	130	148	157	188	188	117	119	115	119	176	176	158	168	188	191	113	113	166	175
Palm_028	Palm Beach	2006	203	209	188	188	130	130	148	157	188	188	115	119	117	119	168	168	158	158	182	182	113	113	166	175
Palm_029	Palm Beach	2006	195	209	184	186	128	128	156	159	184	184	119	121	115	115	172	178	156	171	188	191	95	113	166	172
Palm_030	Palm Beach	2006	197	197	188	188	128	128	157	160	184	184	119	121	119	141	168	168	156	171	182	191	113	113	172	175
Palm_031	Palm Beach	2006	197	203	184	188	128	128	156	157	188	188	117	121	119	119	174	176	158	168	191	191	113	113	166	172
Palm_032	Palm Beach	2006	195	209	184	186	128	128	156	157	184	188	117	119	115	115	172	178	156	171	182	188	95	113	148	166
Palm_033	Palm Beach	2006	197	209	188	188	130	130	148	157	188	188	115	119	115	119	166	168	158	158	182	188	113	113	166	175
Palm_034	Palm Beach	2006	197	209	184	188	128	130	156	157	184	188	119	121	115	115	176	178	171	171	182	182	95	113	148	166
Palm_035	Palm Beach	2006	195	209	184	188	128	130	156	157	184	188	117	119	115	155	170	176	158	171	188	191	95	113	166	172
Palm_036	Palm Beach	2006	195	209	184	186	128	130	156	159	184	188	119	121	115	155	170	172	156	158	182	191	95	113	166	172
Palm_037	Palm Beach	2006	197	209	184	188	128	128	156	157	184	188	119	121	115	115	170	176	156	171	182	182	95	113	148	166
Palm_038	Palm Beach	2006	197	197	184	186	128	128	152	154	184	188	117	117	117	141	174	176	158	158	182	191	113	113	166	175
Palm_039	Palm Beach	2006	195	209	184	188	128	128	156	159	184	188	119	121	115	115	170	172	156	158	188	191	95	113	166	172
Palm_040	Palm Beach	2006	195	197	188	188	130	130	-9	-9	184	188	115	119	115	119	166	176	158	158	182	191	113	113	166	175
Palm_041	Palm Beach	2006	195	197	188	188	130	130	148	157	188	188	115	119	117	119	168	168	158	168	188	191	113	113	166	175
Palm_042	Palm Beach	2006	197	197	184	188	128	128	152	157	184	184	117	121	119	141	168	174	156	171	182	191	113	113	172	175
Nog_001	Nogales	2013	195	209	188	188	128	128	158	159	184	188	117	121	115	151	172	172	168	168	182	182	104	113	175	175
Nog_002	Nogales	2013	195	197	184	188	128	130	158	159	184	188	115	119	131	145	172	172	168	171	182	182	107	113	166	166
Nog_003	Nogales	2013	197	209	184	184	128	128	152	152	184	188	115	119	115	151	172	172	168	168	182	191	113	113	166	166
Nog_004	Nogales	2013	209	209	188	188	128	128	158	159	184	188	115	115	115	151	172	172	168	171	182	182	104	104	166	175
Nog_005	Nogales	2013	201	201	188	188	128	128	156	158	184	184	121	121	115	115	172	178	168	168	182	182	104	104	172	175
Nog_006	Nogales	2013	195	197	184	188	128	128	156	158	188	188	117	121	115	151	172	172	168	168	182	191	95	104	166	172
Nog_007	Nogales	2013	197	209	186	188	128	128	158	159	184	188	115	115	115	131	172	178	168	168	182	182	95	113	148	166
Nog_008	Nogales	2013	195	209	184	184	128	128	161	161	184	188	115	121	151	151	178	178	168	168	188	188	104	104	172	175
Nog_009	Nogales	2013	197	209	184	184	128	130	158	161	184	184	115	121	115	133	172	178	168	171	182	191	113	113	175	175
Nog_010	Nogales	2013	195	197	184	184	128	130	157	158	184	188	115	117	115	115	172	172	158	174	182	188	113	113	166	175
Nog_011	Nogales	2013	197	209	186	188	128	130	152	161	188	188	115	119	115	131	172	172	168	168	182	182	107	113	166	166
Nog_012	Nogales	2013	197	201	184	184	128	128	156	158	188	188	115	119	115	149	168	172	168	168	182	188	107	113	166	175
Nog_013	Nogales	2013	197	209	184	188	128	128	158	159	188	188	115	115	115	149	172	172	168	168	188	191	95	95	166	175
Nog_014	Nogales	2013	197	209	184	188	128	130	159	161	184	188	115	121	131	131	172	178	168	171	182	188	104	113	166	166
Nog_015	Nogales	2013	201	209	184	186	128	130	158	158	184	188	117	119	115	131	172	172	168	168	182	188	113	113	166	166
Nog_016	Nogales	2013	209	209	184	188	130	130	157	161	184	188	115	115	131	153	172	178	168	168	182	182	95	113	166	175
Nog_017	Nogales	2013	197	201	184	184	128	128	158	158	184	188	115	115	115	115	168	172	168	171	182	191	113	113	166	172
Nog_018	Nogales	2013	197	209	184	188	128	128	156	158	184	188	115	115	115	151	168	172	158	168	182	182	113	113	166	166
Nog_019	Nogales	2013	197	197	184	186	130	130	158	161	184	188	115	117	115	149	166	172	168	171	188	188	104	113	166	175
Nog_020	Nogales	2013	201	209	184	186	128	130	158	158	188	188	115	115	115	155	172	172	168	168	182	188	104	113	166	175
Nog_021	Nogales	2013	209	209	184	184	128	130	156	161	184	188	115	119	131	133	172	172	158	168	188	188	95	104	166	175
Nog_022	Nogales	2013	209	209	184	188	128	128	158	159	184	184	115	115	115	115	168	172	158	171	-9	-9	95	113	148	175
Nog_023	Nogales	2013	197	209	184	186	128	130	158	161	184	188	115	117	131	145	172	172	158	168	182	182	104	113	166	166
Nog_024	Nogales	2013	197	201	184	184	128	128	158	158	188	188	115	115	131	131	172	172	168	171	182	188	95	104	175	175
Nog_025	Nogales	2013	197	201	188	188	128	128	158	161	184	184	115	115	115	131	178	178	158	168	182	182	104	113	166	166
Nog_026	Nogales	2013	195	197	184	188	128	128	159	161	188	188	115	115	115	115	172	172	158	168	182	182	113	113	166	172
Nog_027	Nogales	2013	197	209	184	184	128	128	158	158	184	188	115	119	131	145	168	178	168	171	182	182	113	113	166	175
Nog_028	Nogales	2013	197	197	184	184	128	130	157	158	184	184	115	117	115	131	172	172	168	168	182	182	107	113	175	175
Nog_029	Nogales	2013	209	209	184	184	128	128	152	158	184	188	115	115	115	149	172	178	168	171	182	188	104	113	166	175
Nog_030	Nogales	2013	195	209	186	186	128	128	152	158	188	188	115	121	131	131	172	172	168	168	188	191	104	113	166	175
Nog_031	Nogales	2013	197	201	184	188	128	128	158	158	184	184	117	119	115	151	172	172	168	171	182	191	104	107	166	166
Nog_032	Nogales	2013	201	209	184	188	128	128	158	161	184	188	115	117	131	131	168	178	168	171	188	191	113	113	166	175
Nog_033	Nogales	2013	201	209	188	188	128	128	161	163	188	188	115	117	115	115	172	172	168	168	182	182	104	113	148	166
Nog_034	Nogales	2013	201	209	186	188	128	128	157	158	184	188	115	115	115	115	168	172	168	168	182	182	107	113	166	166
Nog_035	Nogales	2013	197	209	184	184	130	130	158	161	188	188	117	119	115	145	168	178	168	168	182	191	104	113	166	175
Nog_036	Nogales	2013	197	209	184	184	128	128	156	161	184	188	115	117	115	131	172	172	158	174	-9	-9	113	113	166	166
Nog_037	Nogales	2013	201	201	184	184	128	128	158	161	184	188	115	115	115	115	172	178	168	168	182	194	95	113	172	172
Nog_038	Nogales	2013	197	201	184	186	128	128	158	161	184	184	115	121	115	115	172	172	168	168	182	188	107	113	166	175
Nog_039	Nogales	2013	197	197	184	184	128	128	159	159	184	188	115	121	115	131	172	172	168	168	182	191	113	113	172	175
Nog_040	Nogales	2013	197	197	184	184	128	128	159	159	184	188	115	121	115	115	168	172	168	168	182	182	95	113	148	175
Nog_041	Nogales	2013	197	209	184	184	128	130	156	161	184	188	115	119	115	155	172	172	158	168	182	188	107	113	166	175
Nog_042	Nogales	2013	201	209	184	184	128	128	158	159	184	188	115	115	115	145	172	172	168	171	182	188	95	107	166	175
Nog_043	Nogales	2013	195	201	184	188	128	128	158	158	184	188	115	115	115	115	172	172	158	168	188	188	95	113	166	175
Nog_044	Nogales	2013	209	209	188	188	128	130	158	159	184	188	115	117	115	131	166	172	168	168	188	188	95	113	166	166
Nog_045	Nogales	2013	195	195	184	186	128	130	158	161	184	184	115	117	131	145	172	172	168	168	182	188	95	113	175	175
Nog_046	Nogales	2013	197	197	184	188	128	128	158	159	184	188	115	115	115	115	172	172	168	168	-9	-9	104	113	166	175
Nog_047	Nogales	2013	197	201	184	184	128	130	156	161	188	188	115	117	131	145	172	178	158	168	188	188	95	104	175	175
Nog_048	Nogales	2013	197	197	184	184	128	128	156	158	184	188	115	117	115	115	168	172	168	168	182	182	95	113	166	166
Nog_049	Nogales	2013	197	209	184	186	128	128	158	159	184	188	115	115	115	115	172	172	168	171	-9	-9	104	107	166	166
Nog_050	Nogales	2013	197	209	184	184	128	130	152	159	184	188	115	115	151	151	172	172	168	168	182	182	113	113	166	175
Nog_051	Nogales	2013	201	201	184	184	128	128	158	158	184	184	115	121	115	153	172	172	168	171	-9	-9	107	107	148	166
Tj_001	Tijuana	2013	197	201	184	186	128	130	158	160	184	188	117	117	137	151	166	178	158	168	182	182	113	113	166	175
Tj_002	Tijuana	2013	197	201	184	186	128	130	156	158	184	188	117	117	137	151	172	178	158	168	182	182	113	113	166	175
Tj_003	Tijuana	2013	197	201	184	186	128	128	158	160	184	188	117	117	137	145	172	178	171	171	182	182	113	113	166	166
Tj_004	Tijuana	2013	197	201	184	188	128	128	156	157	184	184	115	117	137	151	166	172	158	171	182	182	113	113	166	166
Tj_005	Tijuana	2013	209	209	184	188	128	130	158	160	184	188	115	117	137	145	172	172	171	171	182	188	113	113	166	175
Tj_006	Tijuana	2013	209	209	184	186	128	130	156	158	184	188	117	117	145	151	166	178	171	171	182	182	107	113	166	175
Tj_007	Tijuana	2013	201	209	184	188	128	130	157	160	188	188	117	119	115	145	166	176	158	168	188	191	113	113	166	175
Tj_008	Tijuana	2013	197	209	184	186	130	130	158	160	184	188	117	117	145	145	166	172	168	171	182	182	107	113	175	175
Tj_009	Tijuana	2013	197	209	184	186	128	130	158	160	184	188	117	117	137	145	172	178	158	168	182	188	113	113	166	175
Tj_010	Tijuana	2013	201	209	184	186	128	130	158	160	184	188	117	117	137	151	172	172	158	168	182	182	113	113	166	175
Tj_011	Tijuana	2013	209	209	184	186	128	128	157	160	184	184	117	117	145	145	172	172	158	171	182	188	107	113	166	166
Tj_012	Tijuana	2013	197	201	184	188	128	130	157	160	184	184	115	117	137	145	172	172	158	168	182	182	113	113	166	175
Tj_013	Tijuana	2013	209	209	184	188	128	130	157	160	184	184	115	117	145	145	172	172	171	171	182	188	107	113	166	175
Tj_014	Tijuana	2013	197	209	184	186	130	130	157	160	184	184	117	117	145	151	172	172	168	171	182	188	107	113	175	175
Tj_015	Tijuana	2013	201	201	188	188	128	130	157	158	188	188	119	119	115	145	166	176	168	168	188	191	113	113	166	166
Tj_016	Tijuana	2013	201	209	184	186	128	128	158	160	184	188	117	117	145	151	166	172	158	168	182	182	107	113	166	166
Tj_017	Tijuana	2013	197	209	184	186	128	130	156	157	184	184	117	119	145	145	172	178	171	171	182	188	107	113	166	175
Tj_018	Tijuana	2013	201	209	188	188	128	128	157	158	188	188	119	119	115	151	172	178	158	171	182	191	113	113	175	175
Tj_019	Tijuana	2013	201	209	184	188	128	128	156	157	184	184	115	119	137	151	166	178	158	171	182	182	113	113	166	166
Tj_020	Tijuana	2013	201	209	184	186	128	128	156	158	184	188	117	119	137	145	172	172	171	171	182	182	113	113	166	166
Mad15_001	Madera	2015	197	209	184	188	128	128	148	159	184	184	117	121	115	143	166	176	162	162	182	194	113	113	175	175
Mad15_002	Madera	2015	197	209	188	188	128	128	148	160	184	184	117	119	115	143	176	178	162	168	191	194	107	113	148	172
Mad15_003	Madera	2015	197	209	188	188	128	128	160	160	184	188	115	117	143	143	178	178	158	168	182	182	113	113	166	166
Mad15_004	Madera	2015	197	209	188	188	130	130	156	158	184	188	115	115	115	145	176	178	162	162	182	182	113	113	175	175
Mad15_005	Madera	2015	197	197	188	188	128	128	148	158	184	188	117	121	137	143	176	178	162	168	182	182	113	113	148	175
Mad15_006	Madera	2015	197	209	188	188	128	128	158	160	184	184	117	127	115	115	172	178	158	158	182	188	113	113	148	175
Mad15_007	Madera	2015	197	197	188	188	128	128	158	160	184	188	115	121	115	143	176	178	158	168	182	182	113	113	166	175
Mad15_008	Madera	2015	197	197	184	188	128	128	160	160	184	184	127	127	115	145	176	178	162	168	182	182	113	113	166	172
Mad15_009	Madera	2015	197	209	188	190	128	128	158	159	184	184	121	127	115	137	166	176	162	168	182	182	113	113	175	175
Mad15_010	Madera	2015	197	209	188	190	128	128	159	159	184	184	121	127	115	143	168	178	158	168	182	182	113	113	166	166
Mad15_011	Madera	2015	197	201	188	188	128	128	158	158	184	184	121	127	115	143	166	166	162	162	182	191	113	113	175	175
Mad15_012	Madera	2015	197	201	184	190	128	128	158	159	184	184	115	127	115	143	168	168	158	158	182	182	113	113	166	175
Mad15_013	Madera	2015	197	197	184	188	128	128	148	148	184	184	115	115	145	149	176	178	162	168	191	194	113	113	148	166
Mad15_014	Madera	2015	209	209	184	188	128	128	156	159	184	184	117	127	143	145	178	178	158	162	182	188	113	113	172	175
Mad15_015	Madera	2015	197	201	184	188	128	128	158	158	184	184	115	127	115	143	168	168	158	158	182	182	113	113	166	175
Mad15_016	Madera	2015	197	201	188	188	128	128	148	158	184	184	121	121	145	145	168	172	158	162	182	182	113	113	172	175
Mad15_017	Madera	2015	197	197	184	184	128	128	148	160	184	188	117	121	115	137	168	178	158	162	191	194	113	113	175	175
Mad15_018	Madera	2015	197	201	188	188	128	128	158	161	184	184	121	127	143	143	168	178	162	162	182	194	113	113	148	172
Mad15_019	Madera	2015	197	197	184	188	128	128	148	160	184	184	115	121	143	145	178	178	158	162	182	194	107	113	148	166
Mad15_020	Madera	2015	197	197	184	188	128	128	158	160	184	184	127	127	115	115	178	178	158	168	182	182	113	113	148	166
Mad15_021	Madera	2015	197	209	184	188	-9	-9	148	158	184	188	127	127	115	115	178	178	158	162	-9	-9	113	113	175	175
Mad15_022	Madera	2015	197	201	184	188	-9	-9	148	154	184	188	117	127	115	143	178	178	158	168	-9	-9	107	113	148	166
Mad15_023	Madera	2015	197	197	188	188	128	128	160	160	184	184	121	121	115	143	168	178	162	162	182	182	113	113	166	175
Mad15_024	Madera	2015	197	197	188	188	128	128	159	159	184	184	115	115	115	133	166	178	162	162	188	194	113	113	148	166
Mad15_025	Madera	2015	197	197	188	188	128	128	156	160	184	188	117	121	143	145	178	178	158	158	182	194	113	113	166	172
Mad15_026	Madera	2015	197	209	188	188	128	128	158	160	188	188	117	121	115	143	168	178	162	162	182	182	107	113	166	172
Mad15_027	Madera	2015	197	197	188	188	-9	-9	154	158	184	188	117	117	145	145	178	178	158	158	-9	-9	113	113	148	175
Mad15_028	Madera	2015	201	209	184	188	128	128	159	159	184	184	127	127	143	145	172	176	158	162	191	194	113	113	172	175
Mad15_029	Madera	2015	197	197	184	188	128	130	158	159	184	188	117	121	115	137	178	178	158	162	182	182	113	113	175	175
Mad15_030	Madera	2015	197	209	184	188	130	130	158	159	184	184	121	127	115	137	178	178	162	162	182	191	113	113	175	175
Mad15_031	Madera	2015	197	197	188	188	128	128	148	160	184	184	121	127	115	115	168	178	158	162	191	191	113	113	148	166
Mad15_032	Madera	2015	197	197	188	188	130	130	156	160	184	184	121	127	115	143	168	172	158	162	191	194	107	113	148	148
Mad15_033	Madera	2015	197	209	184	188	128	128	157	159	184	184	115	121	115	133	172	176	158	162	182	182	113	113	148	166
Mad15_034	Madera	2015	197	201	188	188	128	128	159	160	184	184	121	121	115	137	178	178	158	168	182	194	113	113	148	166
Mad15_035	Madera	2015	197	209	184	188	130	130	159	160	184	184	117	127	115	145	166	176	162	168	182	191	113	113	148	166
Mad15_036	Madera	2015	209	209	184	188	128	128	158	158	184	184	127	127	115	115	176	178	162	168	182	194	113	113	172	175
Mad15_037	Madera	2015	197	209	184	188	128	128	148	158	184	184	117	121	143	143	172	178	158	162	182	182	113	113	166	166
Mad15_038	Madera	2015	197	209	188	188	128	128	157	159	184	184	115	127	143	163	166	178	158	162	-9	-9	113	113	166	175
Mad15_039	Madera	2015	197	197	188	188	128	128	148	148	184	188	117	121	115	137	178	178	158	162	182	182	113	113	172	172
Mad15_040	Madera	2015	197	197	188	188	130	130	156	159	184	184	115	121	143	145	166	178	162	162	182	191	113	113	175	175
SM14_001	San Mateo	2014	197	209	184	188	-9	-9	158	159	184	184	115	117	143	145	178	178	158	162	-9	-9	95	113	166	166
SM14_002	San Mateo	2014	197	209	188	190	112	112	156	160	184	184	117	127	115	143	168	178	158	162	-9	-9	113	113	166	175
SM14_003	San Mateo	2014	197	209	188	190	112	112	158	158	184	184	121	127	115	149	172	176	158	168	-9	-9	113	113	166	175
SM14_005	San Mateo	2014	197	209	184	190	112	112	148	158	184	188	115	127	115	145	172	178	158	168	-9	-9	113	113	148	172
SM14_006	San Mateo	2014	197	209	188	188	112	128	160	160	184	188	121	121	143	145	166	168	162	168	-9	-9	113	113	172	175
SM14_007	San Mateo	2014	209	209	184	188	112	112	148	158	184	188	115	121	115	143	172	178	158	168	-9	-9	113	113	166	172
SM14_008	San Mateo	2014	209	209	184	188	112	112	148	158	184	188	115	121	115	143	172	178	158	168	-9	-9	113	113	166	172
