# Supplementary material for: Multiple introductions of the dengue vector, Aedes aegypti, into California
Source: PLoS Negl Trop Dis. 2017 Aug 10;11(8):e0005718. doi: 10.1371/journal.pntd.0005718 (PMC5552028; doi:10.1371/journal.pntd.0005718)
Supplement: S2 Table — (XLSX) [file pntd.0005718.s010.xlsx]

## Sheet: Sheet1
Table S2. FST values between all populations included in analyses
Obs.	Fresno	Anaheim (1)	Anaheim (2)	Orange	Garden Grove	Santa Ana	Mission Viejo	San Diego (1)	San Diego (2)	Exeter	San Mateo 2013	Madera 2013 (1)	Madera 2013 (2)	Clovis (1)	Clovis (2)	Los Angeles	Madera 2015	San Mateo 2014	Maricopa County	Tucson	Las Cruces	Nogales	Tijuana	Houston	Cameron	Dallas	New Orleans (1)	New Orleans (2)	Musco (1)	Musco (2)	Rio	Vaca Key	Conch Key	Palm Beach County
Fresno	0	0.24671	0.261232	0.235645	0.363451	0.394611	0.19415	0.158087	0.140732	0.253731	0.027394	0.029326	0.034561	0.119381	0.062638	0.188028	0.039611	0.12042	0.127572	0.138069	0.13031	0.185877	0.178891	0.126698	0.101755	0.073596	0.067753	0.064593	0.108296	0.142563	0.079822	0.104199	0.10926	0.091257
Anaheim (1)	0.24671	0	0.264315	0.333977	0.380686	0.431986	0.337198	0.163791	0.192756	0.291751	0.297285	0.2606	0.277678	0.242528	0.246725	0.299602	0.246512	0.350004	0.145471	0.179715	0.215762	0.20697	0.210462	0.240292	0.229918	0.179236	0.17011	0.19054	0.170189	0.218666	0.166881	0.240353	0.236552	0.172863
Anaheim (2)	0.261232	0.264315	0	0.212101	0.282799	0.372772	0.307707	0.176238	0.164704	0.271442	0.322555	0.27874	0.285471	0.216868	0.224193	0.168079	0.250093	0.313829	0.130626	0.145746	0.184141	0.16537	0.230283	0.253202	0.214066	0.174374	0.144248	0.204475	0.182522	0.188176	0.180864	0.216373	0.180569	0.168129
Orange	0.235645	0.333977	0.212101	0	0.409363	0.443355	0.326215	0.173567	0.14565	0.31397	0.280242	0.234076	0.241548	0.205892	0.211994	0.239757	0.224748	0.312935	0.193093	0.209318	0.214701	0.242482	0.262117	0.297418	0.21229	0.186685	0.152221	0.201014	0.192307	0.216977	0.177083	0.218143	0.194058	0.207729
Garden Grove	0.363451	0.380686	0.282799	0.409363	0	0.39815	0.469069	0.297598	0.308766	0.411155	0.431177	0.343774	0.369157	0.371612	0.323627	0.296844	0.332851	0.368009	0.150288	0.198028	0.267693	0.14403	0.319837	0.301911	0.352305	0.277623	0.266708	0.27913	0.265635	0.379093	0.271889	0.290738	0.253684	0.260033
Santa Ana	0.394611	0.431986	0.372772	0.443355	0.39815	0	0.5264	0.373801	0.360601	0.464841	0.424621	0.371361	0.383069	0.392678	0.359909	0.420404	0.377355	0.472057	0.258961	0.255972	0.330657	0.27395	0.35379	0.431253	0.384435	0.328329	0.336664	0.31426	0.328756	0.434831	0.31863	0.356251	0.331419	0.344686
Mission Viejo	0.19415	0.337198	0.307707	0.326215	0.469069	0.5264	0	0.234426	0.213654	0.36429	0.292815	0.247961	0.259287	0.207553	0.207272	0.324766	0.231181	0.339014	0.230777	0.26288	0.222642	0.323822	0.329883	0.272429	0.170981	0.18459	0.172915	0.199893	0.232178	0.332199	0.197039	0.245336	0.239969	0.205854
San Diego (1)	0.158087	0.163791	0.176238	0.173567	0.297598	0.373801	0.234426	0	0.024893	0.239219	0.193927	0.166977	0.186105	0.102211	0.113989	0.129399	0.126143	0.217957	0.092197	0.112858	0.145457	0.120507	0.114546	0.120781	0.121959	0.100342	0.105182	0.137806	0.118939	0.125776	0.124042	0.153283	0.133893	0.090146
San Diego (2)	0.140732	0.192756	0.164704	0.14565	0.308766	0.360601	0.213654	0.024893	0	0.227859	0.178656	0.159031	0.173972	0.085756	0.120309	0.122901	0.131456	0.217636	0.090136	0.106433	0.136105	0.130877	0.110244	0.123296	0.108371	0.087076	0.084048	0.125676	0.125644	0.149496	0.101569	0.135457	0.129141	0.100735
Exeter	0.253731	0.291751	0.271442	0.31397	0.411155	0.464841	0.36429	0.239219	0.227859	0	0.294975	0.254601	0.258231	0.260727	0.246096	0.26796	0.255169	0.301186	0.21262	0.250494	0.246316	0.243382	0.22481	0.252608	0.251955	0.204317	0.159878	0.21272	0.202658	0.24119	0.1715	0.196129	0.189082	0.177492
San Mateo 2013	0.027394	0.297285	0.322555	0.280242	0.431177	0.424621	0.292815	0.193927	0.178656	0.294975	0	0.023414	0.029688	0.177632	0.111624	0.260229	0.048327	0.159176	0.174402	0.182466	0.173675	0.232712	0.202698	0.182372	0.133498	0.099882	0.104157	0.076088	0.145325	0.196297	0.117455	0.132658	0.123348	0.130586
Madera 2013 (1)	0.029326	0.2606	0.27874	0.234076	0.343774	0.371361	0.247961	0.166977	0.159031	0.254601	0.023414	0	0.007628	0.167105	0.09421	0.214297	0.010339	0.114038	0.128325	0.16103	0.133118	0.199463	0.179392	0.12955	0.11897	0.094836	0.092334	0.085913	0.134342	0.153768	0.104628	0.0988	0.088293	0.110712
Madera 2013 (2)	0.034561	0.277678	0.285471	0.241548	0.369157	0.383069	0.259287	0.186105	0.173972	0.258231	0.029688	0.007628	0	0.186234	0.101508	0.241189	0.047172	0.113547	0.141275	0.166808	0.163572	0.202157	0.188385	0.158378	0.136324	0.093164	0.089062	0.0699	0.115397	0.157977	0.09185	0.094926	0.079206	0.115662
Clovis (1)	0.119381	0.242528	0.216868	0.205892	0.371612	0.392678	0.207553	0.102211	0.085756	0.260727	0.177632	0.167105	0.186234	0	0.048442	0.171259	0.133182	0.242611	0.15475	0.150147	0.166927	0.20767	0.16388	0.142593	0.107622	0.109176	0.109331	0.142419	0.160705	0.195075	0.132537	0.151368	0.166347	0.125502
Clovis (2)	0.062638	0.246725	0.224193	0.211994	0.323627	0.359909	0.207272	0.113989	0.120309	0.246096	0.111624	0.09421	0.101508	0.048442	0	0.146613	0.074228	0.141284	0.117781	0.114515	0.135651	0.155946	0.13838	0.105845	0.08334	0.084387	0.083797	0.099121	0.117751	0.158647	0.083264	0.090587	0.096401	0.078426
Los Angeles	0.188028	0.299602	0.168079	0.239757	0.296844	0.420404	0.324766	0.129399	0.122901	0.26796	0.260229	0.214297	0.241189	0.171259	0.146613	0	0.178293	0.240113	0.122849	0.116539	0.152316	0.116009	0.14716	0.170164	0.18898	0.156605	0.118376	0.184717	0.146761	0.157676	0.152441	0.166058	0.147526	0.126865
Madera 2015	0.039611	0.246512	0.250093	0.224748	0.332851	0.377355	0.231181	0.126143	0.131456	0.255169	0.048327	0.010339	0.047172	0.133182	0.074228	0.178293	0	0.123656	0.111351	0.135176	0.113381	0.182248	0.167824	0.116416	0.104212	0.090585	0.098994	0.106886	0.143633	0.15067	0.118453	0.119718	0.099146	0.106304
San Mateo 2014	0.12042	0.350004	0.313829	0.312935	0.368009	0.472057	0.339014	0.217957	0.217636	0.301186	0.159176	0.114038	0.113547	0.242611	0.141284	0.240113	0.123656	0	0.163131	0.191548	0.221712	0.188434	0.183726	0.17683	0.208432	0.158569	0.139602	0.142708	0.142547	0.174065	0.122833	0.120099	0.115096	0.134405
Maricopa County	0.127572	0.145471	0.130626	0.193093	0.150288	0.258961	0.230777	0.092197	0.090136	0.21262	0.174402	0.128325	0.141275	0.15475	0.117781	0.122849	0.111351	0.163131	0	0.040325	0.078741	0.054975	0.135162	0.066236	0.115108	0.069752	0.07765	0.107835	0.107142	0.1389	0.079653	0.107594	0.098611	0.085783
Tucson	0.138069	0.179715	0.145746	0.209318	0.198028	0.255972	0.26288	0.112858	0.106433	0.250494	0.182466	0.16103	0.166808	0.150147	0.114515	0.116539	0.135176	0.191548	0.040325	0	0.130314	0.053657	0.159635	0.142057	0.147045	0.089921	0.097766	0.112307	0.111182	0.132857	0.098347	0.158137	0.122011	0.108471
Las Cruces	0.13031	0.215762	0.184141	0.214701	0.267693	0.330657	0.222642	0.145457	0.136105	0.246316	0.173675	0.133118	0.163572	0.166927	0.135651	0.152316	0.113381	0.221712	0.078741	0.130314	0	0.167963	0.190632	0.111578	0.093325	0.099359	0.10143	0.143842	0.167568	0.176979	0.133233	0.151793	0.142364	0.120665
Nogales	0.185877	0.20697	0.16537	0.242482	0.14403	0.27395	0.323822	0.120507	0.130877	0.243382	0.232712	0.199463	0.202157	0.20767	0.155946	0.116009	0.182248	0.188434	0.054975	0.053657	0.167963	0	0.11992	0.13954	0.205693	0.123701	0.123376	0.138295	0.111491	0.133698	0.121633	0.15849	0.139172	0.118949
Tijuana	0.178891	0.210462	0.230283	0.262117	0.319837	0.35379	0.329883	0.114546	0.110244	0.22481	0.202698	0.179392	0.188385	0.16388	0.13838	0.14716	0.167824	0.183726	0.135162	0.159635	0.190632	0.11992	0	0.152501	0.183801	0.140041	0.129959	0.152111	0.114868	0.156185	0.121119	0.129166	0.143054	0.098998
Houston	0.126698	0.240292	0.253202	0.297418	0.301911	0.431253	0.272429	0.120781	0.123296	0.252608	0.182372	0.12955	0.158378	0.142593	0.105845	0.170164	0.116416	0.17683	0.066236	0.142057	0.111578	0.13954	0.152501	0	0.098107	0.074195	0.106392	0.128832	0.163484	0.214602	0.114185	0.090419	0.120511	0.101441
Cameron	0.101755	0.229918	0.214066	0.21229	0.352305	0.384435	0.170981	0.121959	0.108371	0.251955	0.133498	0.11897	0.136324	0.107622	0.08334	0.18898	0.104212	0.208432	0.115108	0.147045	0.093325	0.205693	0.183801	0.098107	0	0.085062	0.079033	0.111943	0.160661	0.17761	0.097969	0.114612	0.104807	0.085592
Dallas	0.073596	0.179236	0.174374	0.186685	0.277623	0.328329	0.18459	0.100342	0.087076	0.204317	0.099882	0.094836	0.093164	0.109176	0.084387	0.156605	0.090585	0.158569	0.069752	0.089921	0.099359	0.123701	0.140041	0.074195	0.085062	0	0.045737	0.048006	0.076215	0.100296	0.057033	0.078219	0.091092	0.071942
New Orleans (1)	0.067753	0.17011	0.144248	0.152221	0.266708	0.336664	0.172915	0.105182	0.084048	0.159878	0.104157	0.092334	0.089062	0.109331	0.083797	0.118376	0.098994	0.139602	0.07765	0.097766	0.10143	0.123376	0.129959	0.106392	0.079033	0.045737	0	0.026185	0.05289	0.081252	0.029368	0.070668	0.059751	0.051635
New Orleans (2)	0.064593	0.19054	0.204475	0.201014	0.27913	0.31426	0.199893	0.137806	0.125676	0.21272	0.076088	0.085913	0.0699	0.142419	0.099121	0.184717	0.106886	0.142708	0.107835	0.112307	0.143842	0.138295	0.152111	0.128832	0.111943	0.048006	0.026185	0	0.056154	0.094241	0.045159	0.08685	0.074925	0.07649
Musco (1)	0.108296	0.170189	0.182522	0.192307	0.265635	0.328756	0.232178	0.118939	0.125644	0.202658	0.145325	0.134342	0.115397	0.160705	0.117751	0.146761	0.143633	0.142547	0.107142	0.111182	0.167568	0.111491	0.114868	0.163484	0.160661	0.076215	0.05289	0.056154	0	0.03566	0.050046	0.100573	0.08908	0.061509
Musco (2)	0.142563	0.218666	0.188176	0.216977	0.379093	0.434831	0.332199	0.125776	0.149496	0.24119	0.196297	0.153768	0.157977	0.195075	0.158647	0.157676	0.15067	0.174065	0.1389	0.132857	0.176979	0.133698	0.156185	0.214602	0.17761	0.100296	0.081252	0.094241	0.03566	0	0.090515	0.125981	0.105654	0.072781
Rio	0.079822	0.166881	0.180864	0.177083	0.271889	0.31863	0.197039	0.124042	0.101569	0.1715	0.117455	0.104628	0.09185	0.132537	0.083264	0.152441	0.118453	0.122833	0.079653	0.098347	0.133233	0.121633	0.121119	0.114185	0.097969	0.057033	0.029368	0.045159	0.050046	0.090515	0	0.040404	0.0571	0.049436
Vaca Key	0.104199	0.240353	0.216373	0.218143	0.290738	0.356251	0.245336	0.153283	0.135457	0.196129	0.132658	0.0988	0.094926	0.151368	0.090587	0.166058	0.119718	0.120099	0.107594	0.158137	0.151793	0.15849	0.129166	0.090419	0.114612	0.078219	0.070668	0.08685	0.100573	0.125981	0.040404	0	0.043007	0.060421
Conch Key	0.10926	0.236552	0.180569	0.194058	0.253684	0.331419	0.239969	0.133893	0.129141	0.189082	0.123348	0.088293	0.079206	0.166347	0.096401	0.147526	0.099146	0.115096	0.098611	0.122011	0.142364	0.139172	0.143054	0.120511	0.104807	0.091092	0.059751	0.074925	0.08908	0.105654	0.0571	0.043007	0	0.058016
Palm Beach County	0.091257	0.172863	0.168129	0.207729	0.260033	0.344686	0.205854	0.090146	0.100735	0.177492	0.130586	0.110712	0.115662	0.125502	0.078426	0.126865	0.106304	0.134405	0.085783	0.108471	0.120665	0.118949	0.098998	0.101441	0.085592	0.071942	0.051635	0.07649	0.061509	0.072781	0.049436	0.060421	0.058016	0
